# Supplementary material for: A Test of the Coordinated Expression Hypothesis for the Origin and Maintenance of the GAL Cluster in Yeast
Source: PubMed Central journal article supplement (PMC3178652; doi:10.1371/journal.pone.0025290), 2011-09-22
Supplement: pone.0025290.s001.pdf [file pone.0025290.s001.pdf]

8/27/08

## OPERON-LIKE ORGANIZATION OF THE GAL GENES

Although eukaryotes lack true operons, there are examples of operon-like gene clusters. Three examples are the galactose utilization genes in *S. cerevisiae* (*GAL1*, *GAL10*, *GAL7*), the allantoin degradation genes in *S.c.* (*DAL1*, *DAL2*, *DAL3*, *DAL4*, *DAL7*, *DCG1*), and the thalianol synthesis genes in *Arabidopsis* (*THAS*, *THAH*, *THAD*):

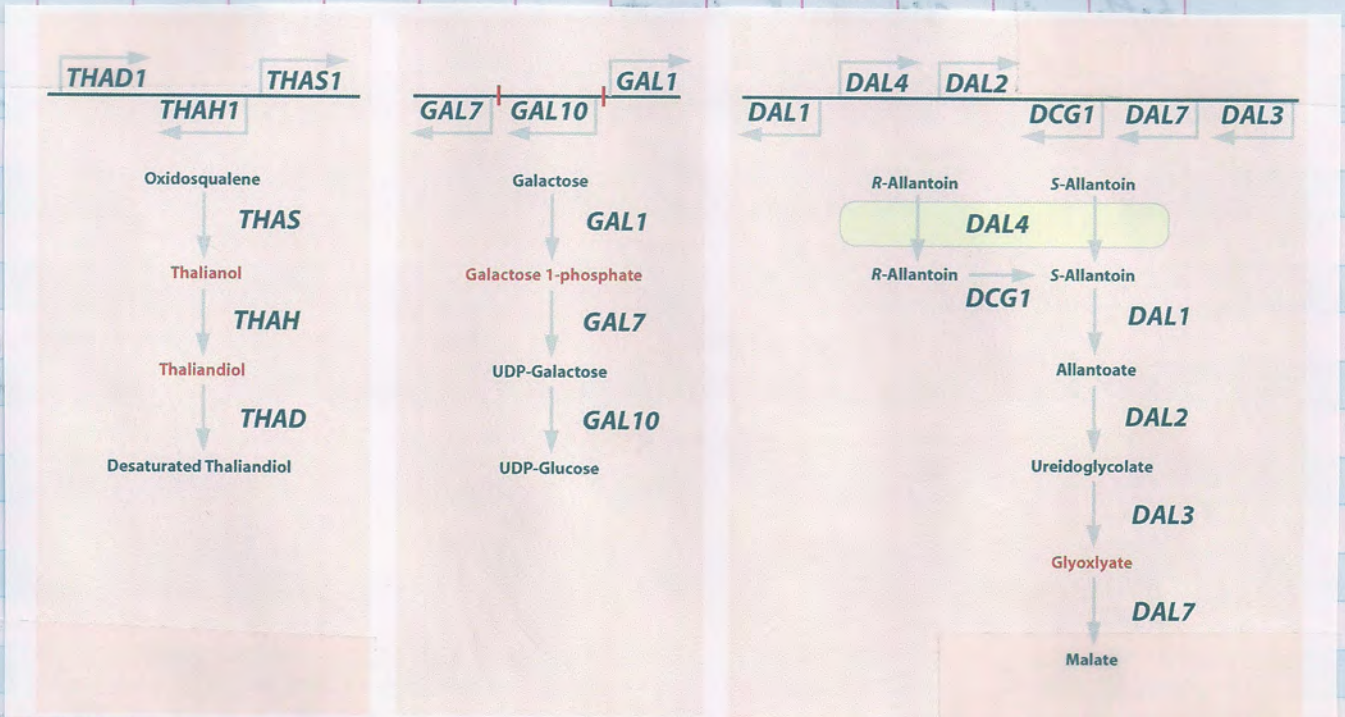

Two explanations have been given to account for this organization: genetic ~~clustering~~ linkage and metabolic channeling.

The genetic linkage hypothesis seems to be favoured in the literature. It is interesting to note, however, that all three pathways above have intermediates that are toxic to the organism (in red). Here I want to test the hypothesis that the operon-like organization allows for better co-regulation of the genes and helps channel maintain flux through the pathway thus prevent the accumulation of the toxic intermediate →



8/28/08

I want to show that disruption of the operon-like organization of the GAL genes:

- (1) leads to less co-ordinated expression
- (2) reduces fitness
- (3) leads to a buildup of pathway intermediates.

The strategy for (1) & (2) is to tag the GAL genes with fluorescent proteins or delete the GAL genes both in cis and in trans.

I have put a lot of thought into how to do the strain construction. Some of the issues:

- strain bkg: W303 or S288c
- auxotrophs or prototrophs
- HAP1+?
- delete all 3 genes (GAL1, 10, 7) in each strain? or just pairs (i.e. GAL1 & 10)
- leave drug markers in place or popout? (Popout req. gal induction of (re))
- Fitness assays: indirect (FACS) or direct (sequencing)

8/28/08

### NOTES ON STRAINS

I have decided upon a strain construction strategy. I will use prototrophic Hap1+ strains of S288c. FACS-based fitness assays will be more difficult since S288c has bkg fluorescence - also I can not use my standard (W303) reference. I would like to use quantitative sequencing to directly compare fitness of various strains. I am not going to popout the markers, rather I will use KanMX, NatMX, and HygMX for GAL1, 10, & 7. In addition, I will make sure that I delete all three genes in each strain. I will make the Mata & Mata $\alpha$  portions of the strains separately - prior to mating I will select for SFOAR in each of the Mata $\alpha$  strains - this will give each finished strain a unique SNP to be used for quantitative sequencing. This will require that the Mata portion have a deletion of ura3 to prevent amplification of the WT URA3.



8/28/08

8/28/08

STRAINS TO BE CONSTRUCTED - FOR GENE DELETION/FITNESS

L - GAL1 K - KanMX

7 - GAL7 H - HygMX

10 - GAL10 N - NatMX

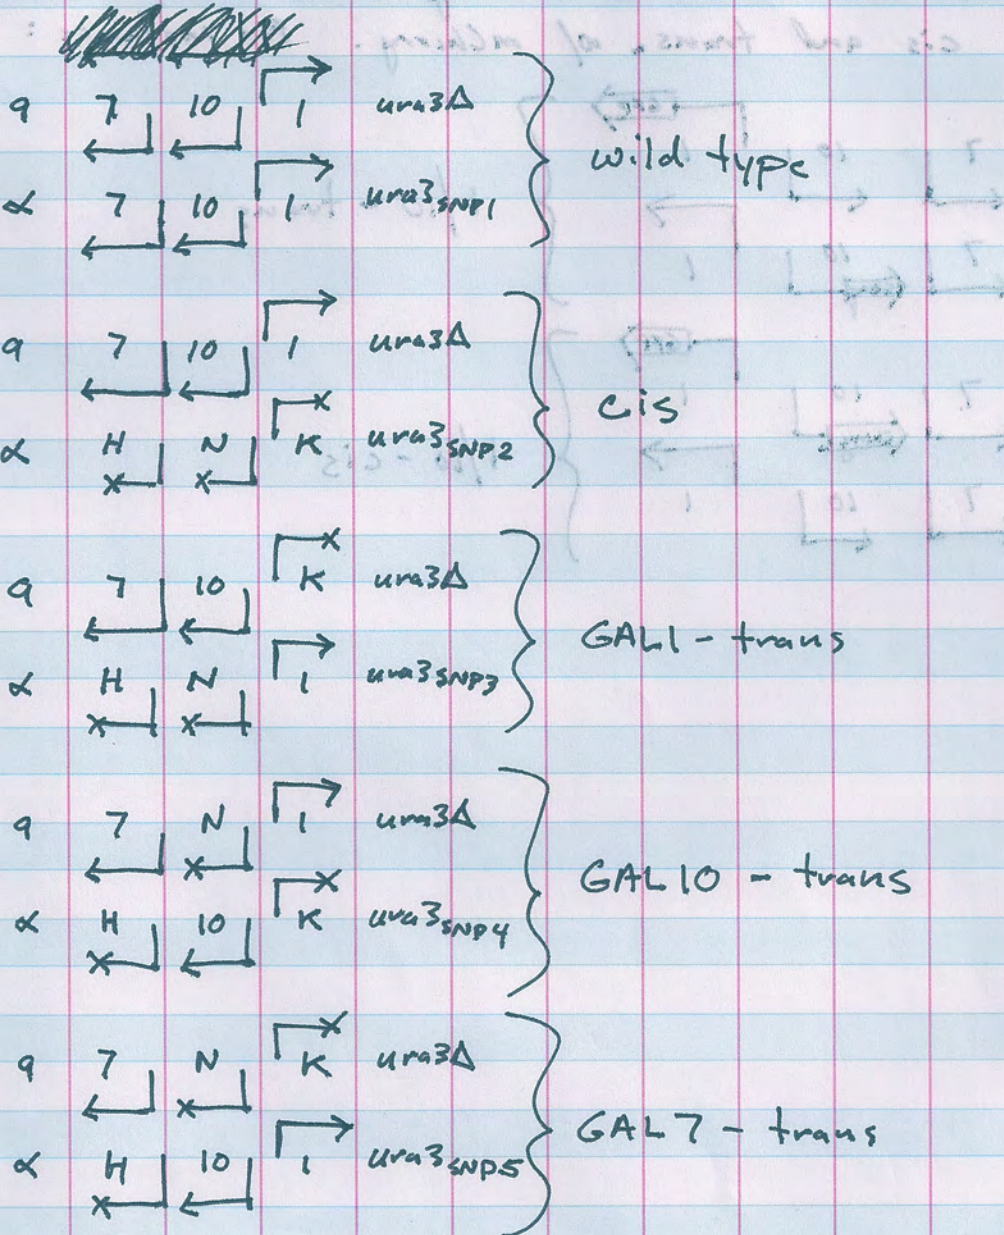



8/29/08

8/29/08

STRAINS TO BE CONSTRUCTED - CO-ORDINATED EXPRESSION

In addition to measuring fitness in the deletion strains, I will need to construct strains to measure the coordinated expression. For this, I will use a GAL1-GFP fusion from Max. I will tag either GAL7 or GAL10 in both cis and trans w/ mCherry. For instance:

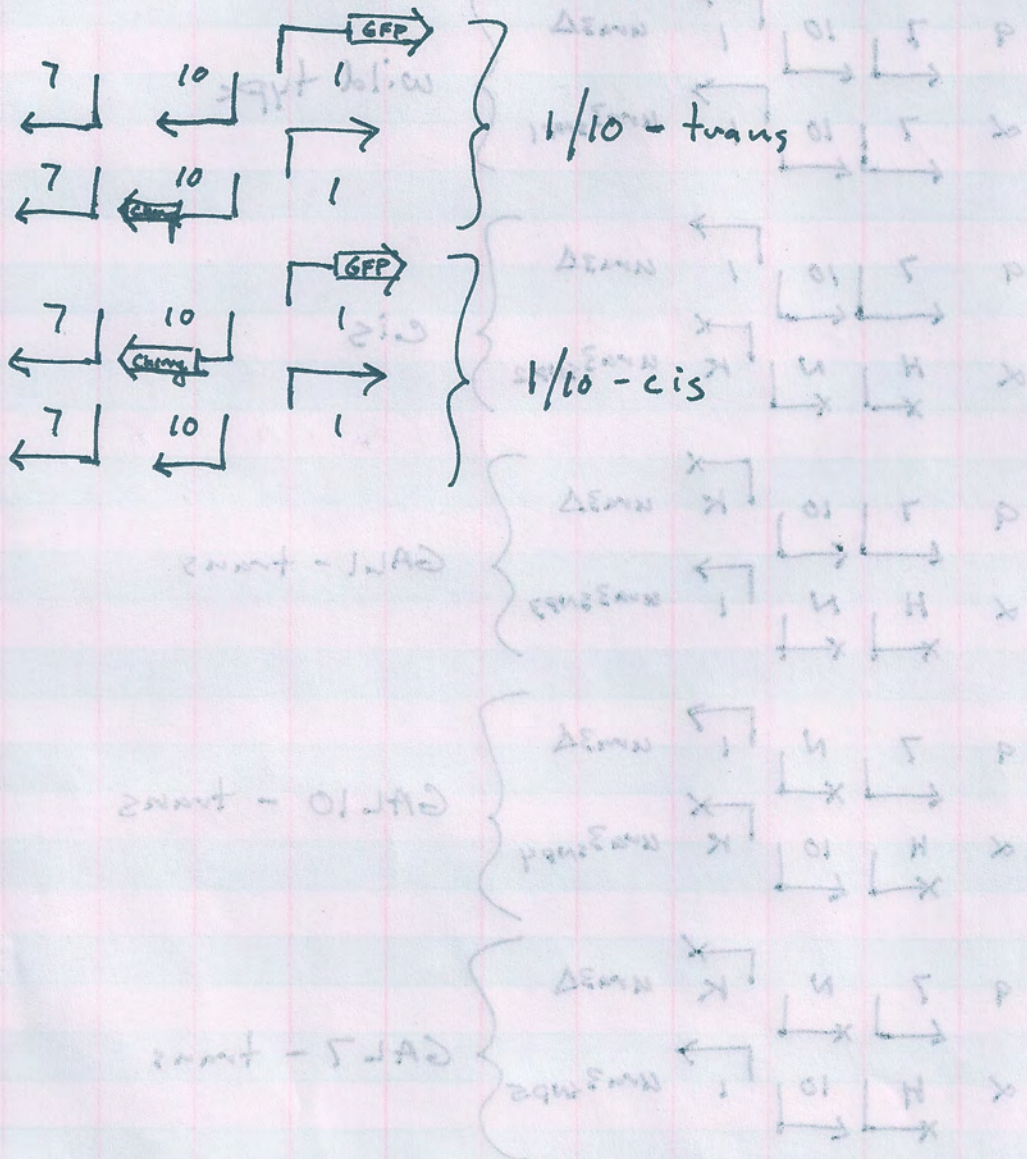



10/9/08

80/01/01

NOTES:

I've decided to construct the strains as URA prototrophs and I will plan to use the FACS-based fitness assay to measure growth rate against a common reference.

I have obtained primers to knock out GAL1, GAL10, & GAL7 using NatMX, KanMX, and HphMX, respectively.

```
oGIL103 GAL1_extF1 ATATACCTCTATACTTTAACGCTCAAGGAGAAAAAACTATAGATCCCCGGGTTAATTAAGG
for knocking out GAL1 with NatMX from pAG25

oGIL104 GAL1_extR1 TGAAGAAGTTGTTCTGAACAAAGTAAAAAAGAAGTATACTAATACGACTCACTATAGGG
for knocking out GAL1 with NatMX from pAG25

oGIL105 GAL10_extF1 CCATCCAAAAAAGTAAGAATTTTTGAAAATCAATATAACGCTACGCTGCAGGTCGAC
for knocking out GAL10 with KanMX from pFA6a

oGIL106 GAL10_extR1 TATAGAGTGCATATTTTCAAGAAGGATAGTAAGCTGGCAAATCGATGAATTCGAGCTCG
for knocking out GAL10 with KanMX from pFA6a

oGIL107 GAL7_extF1 TCAACATGATAAAAAAACAGTTGAATATCCCTCAAAGATCCCCGGGTTAATTAAGG
for knocking out GAL7 with HphMX from pAG32

oGIL108 GAL7_extR1 ATAGAAAAATATGATATGAATGAATATTCCTTTCTTTTAAATACGACTCACTATAGGG
for knocking out GAL7 with HphMX from pAG32

oGIL109 GAL10mCherry_forward ACGGTGAAACTTACGGGTCCAAGATTGTCTACAGATTTTCCATGGTGAGCAAGGGCGAGG
for tagging GAL10 with mCherry::KanMX from pAC77

oGIL110 GAL10mCherry_reverse ATAGAGTGCATATTTTCAAGAAGGATAGTAAGCTGGCAAATAATACGACTCACTATAGGG
for tagging GAL10 with mCherry::KanMX from pAC77

oGIL111 GAL7mCherry_forward TAAGAAATTTAGATGGTTCAGATTCTATCTACAAAGACTGATGGTGAGCAAGGGCGAGG
for tagging GAL7 with mCherry::KanMX from pAC77

oGIL112 GAL7mCherry_reverse ATAGAAAAATATGATATGAATGAATATTCCTTTCTTTTAAATACGACTCACTATAGGG
for tagging GAL7 with mCherry::KanMX from pAC77
```

Yesterday I struck from frozen stock bacteria carrying the plasmids pAG25, pFA6a, and pAG32.

This morning I inoculated a single colony off each plate into 2 mL 2xYT+Amp ~ 10:45

Miniprep plasmids → elute 30% EB

PCR cassettes:

TEMPLATE

pAG25  
pFA6a  
pAG32

PRIMERS

GAL1-extF1 / GAL1-extR1  
GAL10-extF1 / GAL10-extR1  
GAL7-extF1 / GAL7-extR1



10/10/08

TRANSFORMATION OF ~~HYPER~~ FY4 & FY5 w/ gal7Δ::HphMX

On Tuesday (10/7) I streaked FY4 & FY5 from frozen stock

Last night I inoculated 3ml YPD w/ single colony of FY4 & FY5

This morning I diluted each o/n 1:100 (100μl into 10ml) ~ 9:15

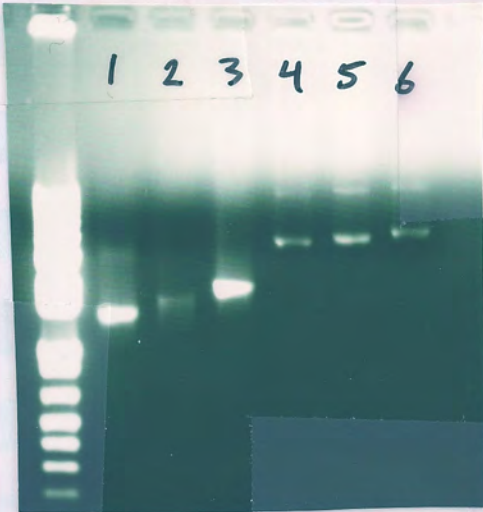

LANE

- 1 gal1Δ::Nat
  - 2 gal10Δ::Kan
  - 3 gal7Δ::Hph
  - 4 pAG25
  - 5 pFA6a
  - 6 pAG32
- } primers on p. 5

→ PCR prep → elute 30μl EB

Coulter count ~ 3:00 pm

|          |                      |                      |
|----------|----------------------|----------------------|
| Bkg      | 2.724 E <sup>6</sup> |                      |
| FY4      | 4.192 E <sup>7</sup> | 4.222 E <sup>7</sup> |
| FY5      | 3.947 E <sup>7</sup> | 3.968 E <sup>7</sup> |
| Post Bkg | 3.742 E <sup>6</sup> | 3.362 E <sup>6</sup> |

Transform FY4 & FY5 w/ 13μl of gal7Δ::Hph PCR product



10/13/08

NOTES ON gal7Δ::Hph TRANSFORMATION

- Transformation was done @ 30° → heat shock @ 42° w/ DMSO
- Plated on YPD. Incubated o/n then replica plated to YPD+hygromycin on Saturday (10/11).
- For the hygromycin plates I added 25  $\mu$ l of 383 mg/ml hygro stock  $\approx$  320  $\mu$ g/ml final conc. I read that  $\approx$  300  $\mu$ g/ml is recommended. The hygro was clearly not evenly distributed through the plate - I see lawns near the edges - next time I will add more volume to the plates to get a better spread of drug.
- Today I observed ~~20000~~  $\approx$  50 colonies on both of the transformation plates and no colonies on either of the control plates.
- Today I picked two single putative transformants off of each plate and inoculated 5 mL YPD. I also picked a single colony of FY4 & FY5 off of the plate from the fudge. Tomorrow I will transform these six strains with gal10Δ::KanMX  $\rightarrow$  today I will need to redo the PCR in order to get enough product for 6 transformations.
- I decided to do all strain constructions in <sup>both</sup> Mating-types. The strain construction strategy is quite lengthy; by doing it in both mating types I will have done the entire construction twice. If needed I can cross pairs of isogenic strains to make sure that there are no segregating differences in fitness.



10/14/08

10/15/08

TRANSFORMATION OF STRAINS w/ gal10Δ::KanMX

• Yesterday I started o/n cultures of

- FY4
- FY4 gal7A A
- FY4 " B
- FY5
- FY5 gal7A A
- FY5 " B

• ~ 9:15 - dilute cultures 1:100 (100 μ into 10 mL YPD)

• Yesterday I ran 2 200 μ PCR's of the gal10Δ::KanMX cassette using either the pFA6a-KanMX plasmid or the purified gal10Δ::KanMX PCR product (see p 6) as template

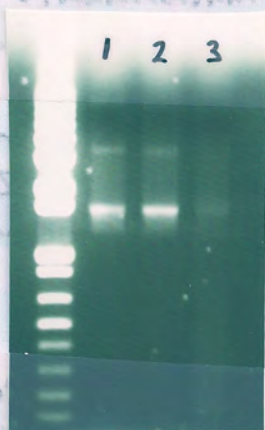

LANE

- 1 Purified PCR from p. 6
- 2 using pFA6a as template
- 3 using PCR as template

→ Purify lane 2 → dilute 60 μ and combine w/ lane 1 →

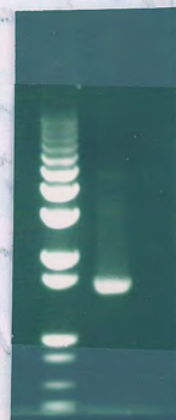

• 2:45 Coulter count

|             |                      |                      |
|-------------|----------------------|----------------------|
| Bkg         | 2.8 E <sup>6</sup>   | 2.482 E <sup>6</sup> |
| FY4 gal7A A | 4.174 E <sup>7</sup> | 4.334 E <sup>7</sup> |
| Post Bkg    | 4.474 E <sup>6</sup> | 4.8 E <sup>6</sup>   |

• 3:00 - Start transformation



10/15/08

NOTES ON gal10Δ::KanMX TRANSFORMATIONS

For the gal10Δ::KanMX transformations I did not do controls for no PCR product. This is partly because I am doing more transformations and I don't want to do twice the samples. It was only for the hygromycin plates where I was concerned about background. This way I can use more cells per transformation.

↳ At the end of the protocol I resuspended the cells using only 20% (instead of 70%) LiOAc mix.

Yesterday I added 75% H<sub>2</sub>O + 23% Hygromycin (383 mg/ml) to four G418 plates.

Today I replica plated the YPD plates from yesterday onto either YPD+G418 (for the FY4 & FY5 transformations) and YPD+G418+hyg (for the transformations in the gal10Δ::HphMX bkg).

10/16/08

I guess my G418 plates were too old ~2 Mo. I got a lawn on all plates. Today I poured a new batch of YPD plates. I will supplement those w/ G418 and hyg (as needed) and redo the replica plating. 2x

10/17/08

Replica plate the original YPD plates (from 10/14) onto the newly made drug plates.



10/15/08 10/16/08

10/15/08

## VERIFICATION AND PURIFICATION OF gal7::Hph TRANSFORMANTS

On 10/14, before I transformed the strains I streaked the o/n cultures of the putative transformants to YPD to get single colonies to freeze down.

↳ Today I will start o/n cultures and freeze down tomorrow. In addition I streaked onto YPD & YPGalactose:

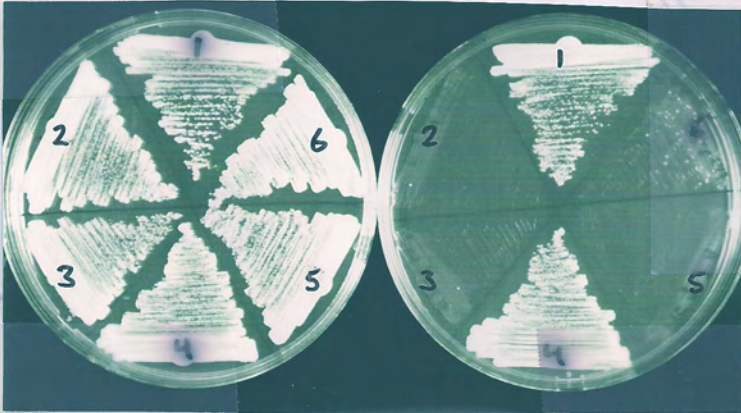

- 1 FY4
- 2 FY4 gal7Δ A
- 3 FY4 " B
- 4 FY5
- 5 FY5 gal7Δ A
- 6 FY5 " B

It appears that the transformations were successful. The few colonies on YPGal (especially in 6) could be due to not purifying the putative transformants.

10/15/08

I guess my G18 plates were too old. I got a new batch of YPD plates. Today I poured a new batch of YPD plates. I will re-plate those of G18 and Hph (as needed) and use the other plates.

10/15/08

Replate the original YPD plates (from 10/14) onto the newly made YPD plates.



10/16/08

10/15/08

PREP. OF pACT7 AND PCR OF mCHERRY CASSETTES AND galIA::Not

Yesterday I miniprep'd 2 clones carrying pACT7 off of the same LB Amp plate - A & B below

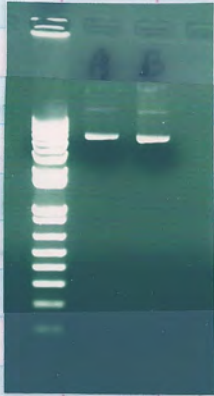

← It is hard to tell, but the purified plasmids may not be identical in size

I set up 5 PCRs (extension 3 m)

| <u>PRIMERS (see p 5)</u>     | <u>TEMPLATE</u> | <u>LANE</u> |
|------------------------------|-----------------|-------------|
| GAL1ertF1/GAL1ertR1          | pAG25 (p.6)     | 1           |
| GAL10mCherry Forward/Reverse | pACT7 A         | 2           |
| GAL7mCherry Forward/Reverse  | " A             | 4           |
| GAL10 <del>---</del>         | " B             | 3           |
| GAL7 <del>---</del>          | " B             | 5           |

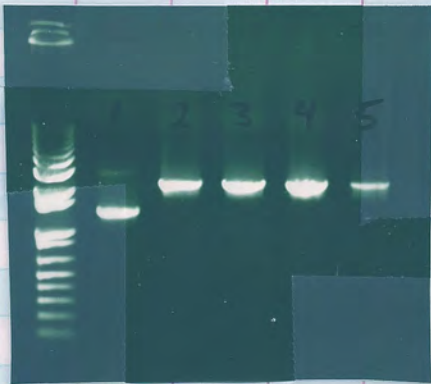

←

10/17/08

Purify lane 1 above

↳ elute ~~30~~<sup>60</sup> EB and combine

w/ lane 1 (p.6) → I now have ~90% of galIA::kanMX ⇒

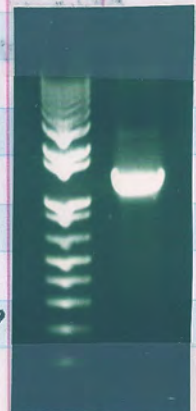



10/17/08

10/17/08

NOTE ON HAPI

I probably should have done this experiment in the HAPI+ background instead of the HAPI hypomorphic background of FY4/FY5.

I think if I have trouble getting these last round of transformations to grow properly on the selective media, I may start over with the HAPI+ bkg. If I see colonies on Sunday I will continue with the strain construction in the FY4/FY5 bkg. Later I may need to address the issue since Max's GFP strain is HAPI+.

Today I froze down the following strains:

|     |                |   |         |
|-----|----------------|---|---------|
| FY4 | gal7Δ::HphMX A | → | yGIL306 |
| FY4 | —————#————— B  |   | " 307   |
| FY5 | —————#————— A  |   | " 308   |
| FY5 | —————#————— B  |   | " 309   |

Today I streaked the following strains

|                                |                     |   |
|--------------------------------|---------------------|---|
| yGIL306                        | } from o/n          | → |
| " 307                          |                     |   |
| " 308                          |                     |   |
| " 309                          |                     |   |
| " 294 (GALI-GFP::Nat)          | } from frozen stock | } |
| " 201 (FY4)                    |                     |   |
| " 202 (FY5)                    |                     |   |
| <del>DBY 12000</del> DBY 12000 |                     |   |
| <del>DBY 12001</del> DBY 12001 |                     |   |

10/17/08

I will start over with the HAPI+ bkg. If I see colonies on Sunday I will continue with the strain construction in the FY4/FY5 bkg. Later I may need to address the issue since Max's GFP strain is HAPI+.



10/20/08

NOTES ON gal10Δ::KanMX TRANSFORMATIONS

There are a number of colonies on the G418 & the G418+Hygromycin plates from 10/17 (see p. 9). There are ~100 colonies per plate — the colonies near the edge are smaller and the bkg lawn is more apparent probably due to a gradient in drug concentration — I restricted pick to picking colonies near the center of the plate.

From some plates I picked a single colony and inoculated 5 ml YPD o/N for transformation today. Today I purified 2 putative transformants off of each plate for freeze-down and I streaked the o/Ns on YPD and YPGal

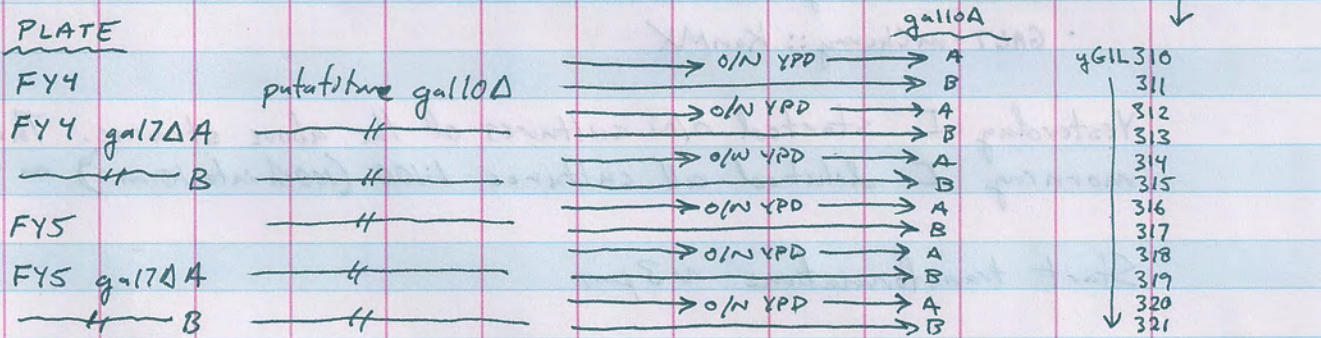

10/23/08

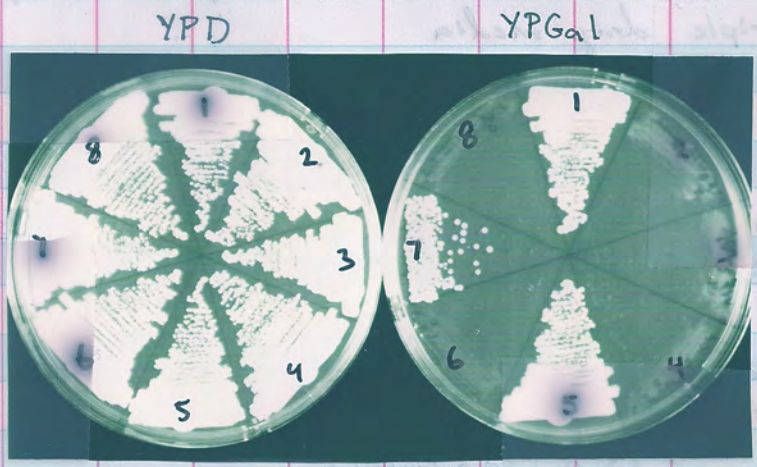

- |   |     |                  |
|---|-----|------------------|
| 1 | FY4 |                  |
| 2 | FY4 | gal10Δ A         |
| 3 | FY4 | gal17ΔA gal10Δ A |
| 4 | FY4 | gal17ΔB gal10Δ A |
| 5 | FY5 |                  |
| 6 | FY5 | gal10Δ A         |
| 7 | FY5 | gal17ΔA gal10Δ A |
| 8 | FY5 | gal17ΔB gal10Δ A |



10/20/08

TRANSFORMATIONS OF gal1Δ::NatMX AND mCherry FUSIONS

Today I am doing a large # of transformations

SET1: Transform the following strains w/ gal1Δ::NatMX cassette:

- FY4
- FY4 gal1Δ
- FY4 gal10Δ
- FY4 gal1Δ gal10Δ
- FY5
- FY5 gal1Δ
- FY5 gal10Δ
- FY5 gal1Δ gal10Δ

SET2: Transform yGIL294 (GAL1-GFP::NatMX) ~~XXXX~~ and DBY12001 with:

- GAL10-mCherry::KanMX
- GAL7-mCherry::KanMX

Yesterday I started o/N cultures of the above strains. This morning I diluted all cultures 1:100 (100  $\mu$ l into 10 ml) ~ 9:00am

Start transformations ~ 3pm

10/21/08

Today I replica plated the transformations from YPD to the proper single, double, or triple drug media

NOTES

• For the gal1Δ::NatMX transformations I used 20  $\mu$ l LiOAc mix; for the mCherry::KanMX transformations I used 70  $\mu$ l and split the cells into two transformations.

• Drug additions: 

|      | STOCK CONC.              |
|------|--------------------------|
| G418 | → 60 $\mu$ l (200 mg/ml) |
| Nat  | → 30 $\mu$ l (100 mg/ml) |
| Hyg  | → 23 $\mu$ l (383 mg/ml) |

• Prior to transformation I pooled the two GAL10-mCherry::KanMX and the two GAL7-mCherry::KanMX PCRs (see p. 11)



10/21/08

### SOME DISCUSSION

Soon I will have the strains I need to start doing experiments. First I will need to cross the strains to produce the diploids described on p. 334 (note that I ended up using Nat for GAL1 and Kan for GAL10).

↳ For the deletion strains I can build two indep. sets since I built everything in both mating types

- Possible control exp — since everything is in both mating types I can cross isogenic strains to make sure that there are no segregating fitness differences.

- The 1<sup>st</sup> expt. will probably be the GFP/mCherry expt so that I can get a good idea of what Glucose/Galactose concentrations to use

- I will do all expts in ~~mix~~ glucose, galactose, and a mixture of glucose & galactose

- It may be useful to do expression arrays on the heterozygous deletes to see if in fact the gene dosage is halved.

- If the fusions function properly I could look at co-localization of the GAL gene products — some evidence suggests that they may form a complex

- I could potentially propagate the trans-deletions for many transfers to see ~~the~~ if I can select for gene conversion.

↳ A similar experiment can be done in a haploid by moving one of the gal genes and seeing if I can select for restoration of the complex.



10/24/08

NOTES ON gal1Δ::NatMX and mCherry TRANSFORMATIONS

- I see many (~50) colonies on all plates except for the GALI-GFP::NatMX transformed w/ mCherry::KanMX where there are no colonies — possibly the cells are not Nat<sup>R</sup>.  
↳ today I replica plated these YPD plates to 2xG418

- On many of the <sup>multi-</sup>drug plates ~~it~~ it was difficult to distinguish the true transformants over the bky. Several things are probably contributing to this: drug gradients across the plate, different densities of cells due to replica plating, and drug interactions

- ↳ for each of the 10 successful transformations (see p. 14) I picked a single colony close to the center of the plate and restreaked to YPD (two colonies for the mCherry strains).

10/27/08

NOTES ON mCherry TRANSFORMATIONS

- Today I see lawns on these G418 plates → Could Max have marked GALI-GFP w/ KanMX? The strains he gave me are listed as Nat<sup>R</sup> but I have never checked these strains. → Rep. to Nat plates.

Today I noticed a single colony colony on the GAL10-mCherry GALI-GFP plate — this colony is near the edge where the drug concentration should be the lowest → Picked this colony; inoc. 5μL YPD <sup>10/27/08</sup> → Not used on Gal → discard

10/30/08

- Max did use KanMX — I checked in his thesis — also I grew streaked his strain (along w/ ~~an~~ known G418<sup>R</sup> and Nat<sup>R</sup> strains) onto YPD, YPD+G418 & YPD+Nat and verified that it is KanMX. Today I will redo these transformations

- ~~Y~~ Yesterday I checked the putative mCherry fusions for fluorescence. Both GAL7 and both GAL10 fusions (strains yG1C390-333, p 17) show strong fluorescence.



10/27/08

NOTES ON gal1Δ::NatMX TRANSFORMATIONS

• Today I picked a single colony off of each of the restreaked putative transformants → inoc. 5 mL YPD

~~XXXXXXXXXX~~  
STRAINS

yGIL201 (FY4) putative gal1Δ::NatMX  
 yGIL202 (FY5) \_\_\_\_\_ #  
 → 306 (FY4 gal7Δ::HphMX) \_\_\_\_\_ #  
 → 308 (FY5 gal7Δ::HphMX) \_\_\_\_\_ #  
 310 (FY4 gal10Δ::KanMX) \_\_\_\_\_ #  
 316 (FY5 gal10Δ::KanMX) \_\_\_\_\_ #  
 312 (FY4 gal7Δ::HphMX gal10Δ::KanMX) \_\_\_\_\_ #  
 ↓ 318 (FY5 gal7Δ::HphMX gal10Δ::KanMX) \_\_\_\_\_ #  
 DBY12000 putative GAL10-mCherry::~~KanMX~~ KanMX A  
 " \_\_\_\_\_ # B  
 " putative GAL7-mCherry::KanMX A  
 " \_\_\_\_\_ # B

10/28/08

FREEZEDOWN

→ yGIL322  
 → 323  
 → 324  
 → 325  
 → 326  
 → 327  
 → 328  
 → 329  
 → 330  
 → 331  
 → 332  
 → 333



10/30/08

PHENOTYPIC CHARACTERIZATION OF GAL MUTANT STRAINS

I wanted to phenotypically characterize the deletion and fusion strains that I have built thus far. Yesterday I spotted these strains onto YPD, YPD+hyg, YPD+Nat, YPD+G418, & YPGal. Some of the strains (7, 8, 11, 12, 13, 14, 15, 16, 19, 20, 21, & 22) I had as saturated cultures on the bench (see p. 17). The others I streaked from frozen stock on 10/27 - I picked a single 2 day old colony and resuspended it in 100 $\mu$ l YPD to do the spotting.

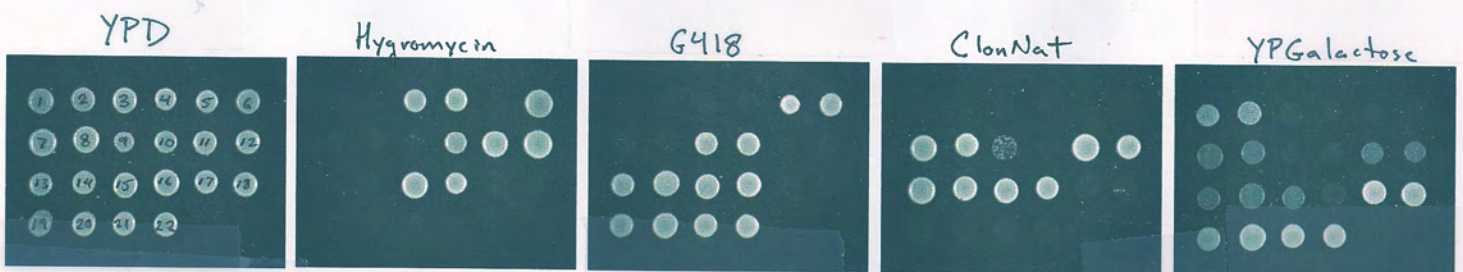

| Spot | Strain                   | YPD | Hyg | G418 | Nat | Gal |
|------|--------------------------|-----|-----|------|-----|-----|
| 1    | FY4                      | +   | -   | -    | -   | +   |
| 2    | FY5                      | +   | -   | -    | -   | +   |
| 3    | FY4 gal7                 | +   | +   | -    | -   | -   |
| 4    | FY5 gal7                 | +   | +   | -    | -   | -   |
| 5    | FY4 gal10                | +   | -   | +    | -   | -   |
| 6    | FY5 gal10                | +   | +   | +    | -   | -   |
| 7    | FY4 gal1                 | +   | -   | -    | +   | -   |
| 8    | FY5 gal1                 | +   | -   | -    | +   | -   |
| 9    | FY4 gal7 gal10           | +   | -   | +    | ?   | -   |
| 10   | FY5 gal7 gal10           | +   | +   | +    | -   | -   |
| 11   | FY4 gal7 gal1            | +   | +   | -    | +   | -   |
| 12   | FY5 gal7 gal1            | +   | +   | -    | +   | -   |
| 13   | FY4 gal10 gal1           | +   | -   | +    | +   | -   |
| 14   | FY5 gal10 gal1           | +   | -   | +    | +   | -   |
| 15   | FY4 gal7 gal10 gal1      | +   | +   | +    | +   | -   |
| 16   | FY5 gal7 gal10 gal1      | +   | +   | +    | +   | -   |
| 17   | DBY12000                 | +   | -   | -    | -   | +   |
| 18   | DBY12001                 | +   | -   | -    | -   | +   |
| 19   | DBY12001 GAL7-mCherry A  | +   | -   | +    | -   | +   |
| 20   | DBY12001 GAL7-mCherry B  | +   | -   | +    | -   | +   |
| 21   | DBY12001 GAL10-mCherry A | +   | -   | +    | -   | +   |
| 22   | DBY12001 GAL10-mCherry B | +   | -   | +    | -   | +   |

Incorrect Strains:

- # 6 - FY5 gal10 $\Delta$  should not grow on hyg
- # 9 - FY4 gal7 $\Delta$  gal10 $\Delta$  should grow on hyg but not on Nat



10/30/08

TRANSFORMATION OF yGIL294 AND DBY12001 w/ mCherry FUSIONS

I need to redo my fusions using the  $\beta$  NatMX marker

I miniprep'd ~~two~~ two colonies off of a freshly streaked plate of bacteria carrying pAC80. <sup>(A & B below)</sup> This plasmid is the same as pAC77 (see p. 11) except that it has the NatMX reporter instead of KanMX.

200  $\mu$ l PCRs as before (p. 11)

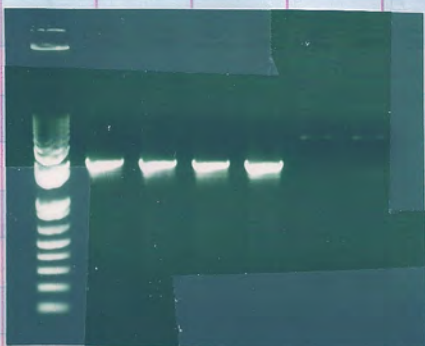

| LANE |                                |
|------|--------------------------------|
| 1    | GAL10-mCherry::Nat off pAC80 A |
| 2    | _____ B                        |
| 3    | GAL7-mCherry::Nat off pAC80 A  |
| 4    | _____ B                        |
| 5    | pAC80 A                        |
| 6    | pAC80 B                        |

PCR purity lanes 1 & 3  $\rightarrow$  elute 30  $\mu$ l EB

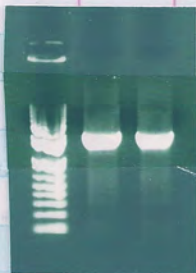

Stored o/n cultures last night  $\rightarrow$  this morning dilute 1:100 (100  $\mu$ l into 10 ml)  $\rightarrow$  9:15 am

3:00 pm - Counter count

|          |                     |                     |
|----------|---------------------|---------------------|
| Bkg      | $1.174 \times 10^6$ | $1.132 \times 10^6$ |
| yGIL294  | $4.199 \times 10^7$ | $4.338 \times 10^7$ |
| DBY12001 | $4.13 \times 10^7$  | $4.121 \times 10^7$ |
| Post Bkg | $2.248 \times 10^6$ | $1.692 \times 10^6$ |

Start transformation  $\sim$  3:15



10/31/08

NOTES ON TRANSFORMATIONS

- For y611294 & DBY12001 I resuspended the cells in 60  $\mu$  LiOAc + 10  $\mu$  carrier this gave me ~120  $\mu$  cells which I split into 2 60  $\mu$  aliquots and added 13  $\mu$  of PCR product to each.
- To 2 YPD plates I added 30  $\mu$  ClonNat and to 2 plates I added 30  $\mu$  ClonNat + 60  $\mu$  G418 (each 1000 $\times$ )
- Today I replica plated the YPD plates to the respective drug plates.

11/3/08

- Yesterday I picked two independent putative transformants of each of the 4 transformations and restreaked to YPD.
- This morning I picked <sup>another</sup> single colony off of each plate and patched it on YPGalactose.

11/4/08

- Yesterday afternoon I patched the 8 restreaked putative mCherry transformants onto YPGal. This morning I looked at the cells under the scope
- of the 4 that I patched off of the transformation plate onto YPGal only the y611294-gal7-mCherry was red - the other 3 were dark.
  - All 8 of the ones restreaked to YPD were red. I picked a single colony off of each of these plates and inoculated 5 mL YPD - I will freeze down these strains tomorrow.



11/5/08

FREEZE DOWN mCherry::NatMX FUSIONS

|          |                |   |   |         |     |
|----------|----------------|---|---|---------|-----|
| yGIL294  | GAL10-mCherry  | A | → | yGIL337 |     |
|          | <del>---</del> | B | → |         | 338 |
|          | GAL7-mCherry   | A | → |         | 339 |
|          | <del>---</del> | B | → |         | 340 |
| DBY12001 | GAL10-mCherry  | A | → |         | 341 |
|          | <del>---</del> | B | → |         | 342 |
|          | GAL7-mCherry   | A | → |         | 343 |
|          | <del>---</del> | B | → |         | 344 |

11/7/08

CONSTRUCTION OF DIPLOID STRAINS (GFP & mCherry FUSIONS)

- On 11/4 I streaked yGIL294, DBY12000, & DBY12001 from freezer
- On 11/5 I patched the above ~~strains~~ strains (yGIL337-344) on YPD
- Yesterday I picked 3 zygotes of the following crosses after 3h on YPD:

|     |                     |                                |   |         |
|-----|---------------------|--------------------------------|---|---------|
| (1) | yGIL337 × DBY12001  | (GAL1-GFP/GAL10-mCherry cis)   | ⇔ | yGIL345 |
| (2) | yGIL338 ×           | "                              |   | 346     |
| (3) | yGIL339 ×           | (GAL1-GFP/GAL7-mCherry cis)    |   | 347     |
| (4) | yGIL340 ×           | "                              |   | 348     |
| (5) | yGIL341 × yGIL294   | (GAL1-GFP/GAL10-mCherry trans) |   | 349     |
| (6) | yGIL342 ×           | "                              |   | 350     |
| (7) | yGIL343 ×           | (GAL1-GFP/GAL7-mCherry trans)  |   | 351     |
| (8) | yGIL344 ×           | "                              |   | 352     |
| (9) | DBY12001 × DBY12000 |                                |   | 353     |

11/10/08

- Yesterday I started o/n 3ml YPD cultures of the 9 strains above → inoculated off of the ~~plates~~ <sup>Zygote</sup> plates.
- Today I froze down the strains



11/7/08

11/2/11

EXPERIMENT: COORDINATED GENE EXPRESSION DURING GALACTOSE PULSE

I am setting up to test if the GAL gene organization coordinates expression of the GAL genes

PROTOCOL OUTLINE

- I will pulse in 0.25 g/L galactose into a steady state glucose limited chemostat (0.08 g/L glucose in feed)
- Samples will be taken every 20 min for 3 h. after pulse

Strains:

- 1/10 - cis
- 1/10 - trans
- 1/7 - cis
- 1/7 - trans

} all strains are GAL1-GFP and have mCherry fused to either GAL10 or GAL7 on either the same chromosome (cis) or homologous chromosome (trans) as GAL1-GFP

For crosses 1, 3, 5, & 7 ~~below~~ on p. 21, pick two colonies and inoculate 1 mL Glucose-limited chemostat media. Spot 5  $\mu$  onto YPD and YPGalactose. Add 4 additional mL of Gluc-limited media to each tube.  $\rightarrow$  roller drum 5:00pm

11/8/08

- Inoculated Chemostats (see "Chemostat Experiments" notebook, Exp #4)

11/12/08

Yesterday I patched onto YPD and YPGal the following:

- yGIL294
- ~~yGIL353~~ yGIL353 } from fridge
- yGIL341
- yGIL343
- yGIL349
- yGIL351 } from freezer

- pick large streak full of cells  $\rightarrow$  ~~wash~~ wash 1 mL H<sub>2</sub>O  $\rightarrow$  resuspend in 1 mL PBST

$\hookrightarrow$  these will be controls for FACS



11/12/08

### GALACTOSE PULSE EXPERIMENT

• Pulse in 375  $\lambda$  20% Galactose (200g/L) into each 300 ml chemostat  $\Rightarrow$  pulse = 0.25g/L

Sample (time following pulse) counts

| <u>t (min)</u>              | <u>1/10 cis</u>      | <u>1/10 trans</u>    | <u>1/7 cis</u>       | <u>1/7 trans</u>     |
|-----------------------------|----------------------|----------------------|----------------------|----------------------|
| <del>10</del>               |                      |                      |                      |                      |
| -10                         | 3.003 E <sup>7</sup> | 2.715 E <sup>7</sup> | 2.68 E <sup>7</sup>  | 2.75 E <sup>7</sup>  |
| 10                          | 2.812 E <sup>7</sup> | 2.721 E <sup>7</sup> | 2.762 E <sup>7</sup> | 2.737 E <sup>7</sup> |
| 20                          | 2.779 E <sup>7</sup> | 2.803 E <sup>7</sup> | 2.744 E <sup>7</sup> | 2.731 E <sup>7</sup> |
| 30                          | 2.705 E <sup>7</sup> | 2.793 E <sup>7</sup> | 2.751 E <sup>7</sup> | 2.701 E <sup>7</sup> |
| 40                          | 2.799 E <sup>7</sup> | 2.802 E <sup>7</sup> | 2.726 E <sup>7</sup> | 2.713 E <sup>7</sup> |
| 50                          | 2.708 E <sup>7</sup> | 2.763 E <sup>7</sup> | 2.688 E <sup>7</sup> | 2.734 E <sup>7</sup> |
| 60                          | 2.764 E <sup>7</sup> | 2.784 E <sup>7</sup> | 2.732 E <sup>7</sup> | 2.726 E <sup>7</sup> |
| 80                          | 2.87 E <sup>7</sup>  | 2.77 E <sup>7</sup>  | 2.719 E <sup>7</sup> | 2.669 E <sup>7</sup> |
| 100                         | 2.753 E <sup>7</sup> | 2.783 E <sup>7</sup> | 2.706 E <sup>7</sup> | 2.739 E <sup>7</sup> |
| 120                         | 2.811 E <sup>7</sup> | 2.774 E <sup>7</sup> | 2.731 E <sup>7</sup> | 2.7 E <sup>7</sup>   |
| 160                         | 2.922 E <sup>7</sup> | 2.852 E <sup>7</sup> | 2.825 E <sup>7</sup> | 2.841 E <sup>7</sup> |
| 200                         | 3.06 E <sup>7</sup>  | 3.043 E <sup>7</sup> | 2.983 E <sup>7</sup> | 2.987 E <sup>7</sup> |
| 11/13/08 $\rightarrow$ 1200 | 2.475 E <sup>7</sup> | 2.503 E <sup>7</sup> | 2.484 E <sup>7</sup> | 2.389 E <sup>7</sup> |

11/13/2008

### NOTES ON GALACTOSE PULSE EXPERIMENT

Sampling: at each time point I removed 500  $\lambda$  using the p1000. I took 10  $\lambda$  for coulter counting. I spun the remainder for 2 min, aspirated media and resuspended in 1ml of PBST (PBS + 0.1% tween) and put o/n in fridge

After the 200 min point I checked the fluorescence - I could see both GFP and mCherry in all strains (although the mCherry was faint)

Today I will run the samples through the FACS

From the counts above it appears that cell # increases only after 160 min - this is consistent w/ Max's data



11/14/08

## PRELIMINARY ANALYSIS OF FACS DATA

Yesterday I ran the Gal-pulse timecourse samples through the FACS. I looked at the data in FlowJo, but I have yet to do a careful analysis - that will probably wait until next week. It appears that GAL1 & GAL10 expression are better coordinated when in cis. However I do not see any difference in the coexpression of GAL & GAL7 between the cis and trans configurations.

Some possible confounding factors:

(1) Maturation of the fluorescent reporters - I always see Gal1-GFP first - this could mean that GAL1 is turned on before GAL10 & GAL7 or that GFP matures faster - if ~~this~~ ~~is~~ the latter is true this would be problematic because the mCherry readout would actually reflect transcription/translation from earlier time points.

(2) Lack of CR in glucose-limited chemostats - carbon limited chemostats are in a state of "non-induction" for the GAL genes as opposed to "repressed" when in the presence of glucose. This is a concern I had early on - I want to redo this experiment going from repressed to induced. There are several ways to achieve this both in batch and in chemostats.

- in chemostats (1) pulse in a mixture of glucose & galactose into a glucose-limited chemostat or (2) switch carbons from phosphate-limited glucose to phosphate-limited galactose

- in batch by (1) growing in a mixture of glucose and galactose or (2) by spinning down log-phase glucose cultures and resuspending in galactose.



12/20/08

## CONSTRUCTING DIPLOID DELETION STRAINS

- On Tuesday (12/16) I streaked the following strains from the freezer:

|         |           |
|---------|-----------|
| yGIL201 | WT        |
| 202     | WT        |
| 306     | 7Δ        |
| 308     | 7Δ        |
| 310     | 10Δ       |
| 316     | 10Δ       |
| 322     | 1Δ        |
| 323     | 1Δ        |
| 312     | 10Δ 7Δ    |
| 318     | 10Δ 7Δ    |
| 326     | 1Δ 10Δ    |
| 327     | 1Δ 10Δ    |
| 328     | 1Δ 10Δ 7Δ |
| 329     | 1Δ 10Δ 7Δ |

- On ~~Wednesday~~ Thursday (12/18) I started 5ml o/w YPD cultures with a single colony of each strain (except 201 & 202).
- Yesterday I made genomic preps of the 12 strains, and ran PCR using the following primers:

39923958 XX<sup>®</sup>IDT<sup>™</sup>  
G.LANG  
81510977 10/21/2008  
GAL1\_extF2  
5'-AGC GTC AAG GAG AAA AAA C-3'  
Tm= 48.3 °C, MW= 5,871.9  
5.8OD<sub>260</sub> 28.00nmol 0.16mg

39923959 XX<sup>®</sup>IDT<sup>™</sup>  
G.LANG  
81509760 10/21/2008  
GAL1\_extR2  
5'-ATT CAT ATA GAC AGC TGC CC-3'  
Tm= 51.9 °C, MW= 6,061.0  
6.6OD<sub>260</sub> 34.10nmol 0.21mg

39923960 XX<sup>®</sup>IDT<sup>™</sup>  
G.LANG  
81509761 10/21/2008  
GAL10\_extF2  
5'-AAT GAC AGC TCA GTT ACA AAG-3'  
Tm= 50.6 °C, MW= 6,447.3  
5.7OD<sub>260</sub> 26.40nmol 0.17mg

39923961 XX<sup>®</sup>IDT<sup>™</sup>  
G.LANG  
81509762 10/21/2008  
GAL10\_extR2  
5'-GTA AGC TGG CAA ATC AGG AA-3'  
Tm= 53.0 °C, MW= 6,199.1  
6.3OD<sub>260</sub> 30.20nmol 0.19mg

39923962 XX<sup>®</sup>IDT<sup>™</sup>  
G.LANG  
81509763 10/21/2008  
GAL7\_extF2  
5'-CCC TCA AAA ATG ACT GCT GA-3'  
Tm= 52.9 °C, MW= 6,070.0  
6.2OD<sub>260</sub> 32.50nmol 0.20mg

39923963 XX<sup>®</sup>IDT<sup>™</sup>  
G.LANG  
81509764 10/21/2008  
GAL7\_extR2  
5'-CCA CTT TCT TTT TAC AGT CTT-3'  
Tm= 48.4 °C, MW= 6,288.1  
6.4OD<sub>260</sub> 35.00nmol 0.22mg



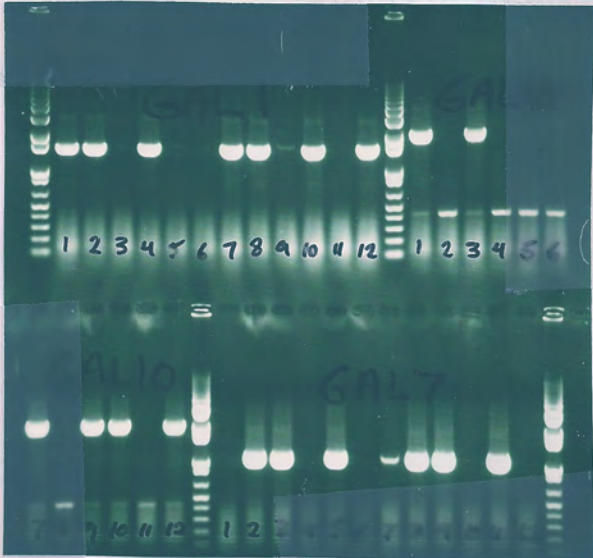

| LANE | Product Size |
|------|--------------|
| 1    | yGIL306      |
| 2    | 310          |
| 3    | 322          |
| 4    | 312          |
| 5    | 326          |
| 6    | 328          |
| 7    | 308          |
| 8    | 316          |
| 9    | 323          |
| 10   | 318          |
| 11   | 327          |
| 12   | 329          |

All primer pairs amplify the coding regions; therefore, no product will be formed in the  $\Delta$  strains.

PRODUCT SIZES

- GAL1 1.6 kb
- GAL10 2.1 kb
- GAL7 1.1 kb

Two of the lanes were ambiguous - I reran a few to make sure that the two light bands were not due to overloading adjacent wells

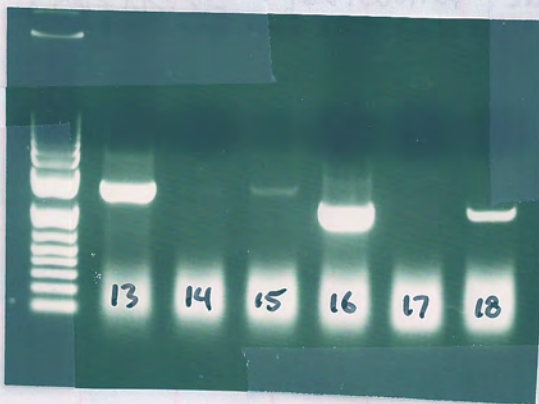

| LANE | PRIMERS | TEMPLATE |
|------|---------|----------|
| 13   | GAL1    | yGIL310  |
| 14   | "       | 322      |
| 15   | "       | 323      |
| 16   | GAL7    | 310      |
| 17   | "       | 306      |
| 18   | "       | 308      |



12/20/08

SUMMARY OF PCR PHENOTYPING

Four ~~strains~~ strains appear to be incorrect:

- (1) yGIL308 - should be 7Δ
- (2) yGIL323 - ~~WT~~ 1Δ
- (3) yGIL318 - ~~WT~~ 10Δ 7Δ
- (4) yGIL329 - ~~WT~~ 10Δ 7Δ 1Δ

interestingly these are all Mat $\alpha$  strains

I should redo these PCRs and get primers that are external to the coding sequence.

SETTING UP CROSSES

I wanted to make homozygous WT and deletion strains by crossing:

|                               |                               |                               |
|-------------------------------|-------------------------------|-------------------------------|
| <u>Mat<math>\alpha</math></u> | <u>Mat<math>\alpha</math></u> |                               |
| yGIL201                       | x yGIL202                     | WT/WT                         |
| yGIL328                       | x yGIL329                     | <del>WT</del> 7Δ10Δ1A/7Δ10Δ1A |

In addition I wanted to make various heterozygous strains using the following crosses:

|                               |                               |                          |
|-------------------------------|-------------------------------|--------------------------|
| <u>Mat<math>\alpha</math></u> | <u>Mat<math>\alpha</math></u> |                          |
| yGIL201                       | x yGIL329                     | WT/7Δ10Δ1A               |
| 306                           | x 327                         | 7Δ/10Δ1A                 |
| 310                           | x 325                         | 10Δ/7Δ1A                 |
| 322                           | x 318                         | 1A/10Δ7A                 |
| 312                           | x 323                         | 7Δ10A/1A                 |
| 324                           | x 316                         | 7Δ1A/10Δ                 |
| 326                           | x 308                         | 10Δ1A/7Δ                 |
| ↓ 328                         | x ↓ 202                       | <del>WT</del> 7Δ10Δ1A/WT |

likely to be wrong (see above)

Set up crosses (~9:30 am)  
@ 12:30 - pick 3 zygotes for each cross

12/23/08

Yesterday I picked a single colony from each cross and inoculated 5ml YPD.



12/23/08

12/23/08

I reran the PCR on the two strains that were ambiguous (see p. 13). Here it seems that both yGIL323 & yGIL308 are true gal1Δ and gal7Δ respectively.

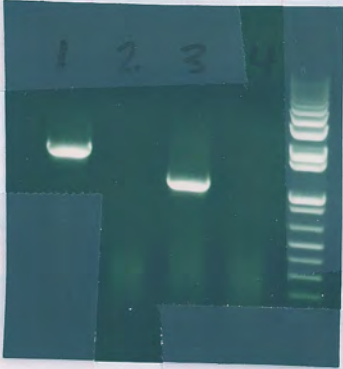

| LANE | PRIMERS | TEMPLATE |
|------|---------|----------|
| 1    | GAL1    | yGIL310  |
| 2    | "       | yGIL323  |
| 3    | GAL7    | yGIL310  |
| 4    | "       | yGIL308  |

#### NOTES ON STRAIN CONSTRUCTION

From the PCRs I suspect that two of my strains are incorrect: yGIL318 and yGIL329 (which was derived from yGIL318). I have 3 isogenic strains to yGIL318 (yGIL319-321, see p. 13). I have yet to do PCR on yGIL324 & 325 - I hope to do that today. Also, today I will phenotype these strains and the crosses.

I should have been wary of yGIL318 given the photograph on p. 13. showing some growth of this strain on Gal plates.

- Streak yGIL319-321 from freezer. Friday I plan to transform these strains w/ the ~~galla~~ gal1Δ::NatMX cassette to generate a Mata triple A to replace the incorrect ~~strains, yGIL365 and yGIL357~~ strain yGIL329.



12/24/08

• Yesterday I froze down the crosses from p. 27

| Mat a | Mat α | New Strain # |
|-------|-------|--------------|
| 201   | × 202 | → yGIL 356   |
| 201   | × 329 | → 357        |
| 328   | × 202 | → 358        |
| 306   | × 327 | → 359        |
| 326   | × 308 | → 360        |
| 310   | × 325 | → 361        |
| 324   | × 316 | → 362        |
| 312   | × 323 | → 363        |
| 322   | × 318 | → 364        |
| 328   | × 329 | → ↓ 365      |

• Yesterday I made gDNA preps from yGIL324 & yGIL325.  
Overnight, I ran PCRs to genotype these two strains

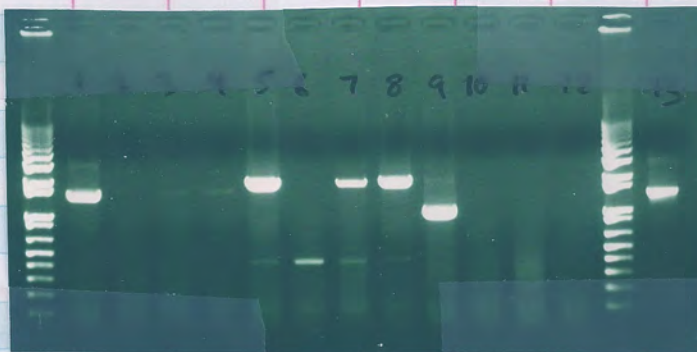

| LANE | PRIMERS | TEMPLATE | CONTROLS |
|------|---------|----------|----------|
| 1    | GAL1    | yGIL 306 | +        |
| 2    | "       | 328      | -        |
| 3    | "       | 324      |          |
| 4    | "       | 325      |          |
| 5    | GAL10   | 306      | +        |
| 6    | "       | 328      | -        |
| 7    | "       | 324      |          |
| 8    | "       | 325      |          |
| 9    | GAL7    | 310      | +        |
| 10   | "       | 328      | -        |
| 11   | "       | 324      |          |
| 12   | "       | ↓ 325    |          |

Both yGIL324 & 325 are gal1Δ/gal7Δ

• Yesterday I set up a 100% PCR to amplify the gal1Δ::NatMX cassette from pAG25 - 3m extension

→ this morning I ran the PCR on a gel (lane 13 above) and put the PCR in the freezer.



12/24/08

PHENOTYPIC CHARACTERIZATION OF GALΔ HAPLOIDS AND DIPLOIDS

Yesterday I pinned the haploid deletes and the diploids to YPD, YPGal, YPD+Hyg, YPD+G418, and YPD+ClonNat

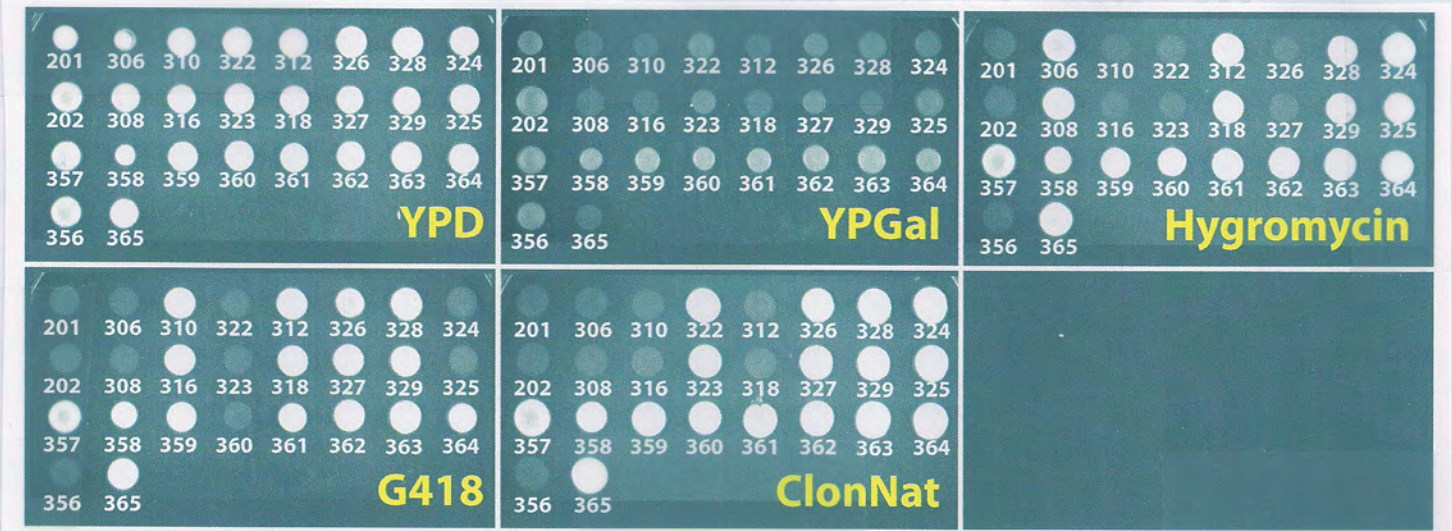

- the YPGal plate is slow growing since it is an old plate

Summary of Phenotypic assay

|          | YPD | YPGal | Hyg | G418 | Nat |
|----------|-----|-------|-----|------|-----|
| yGIL 201 | +   | +     |     |      |     |
| yGIL 306 | +   |       | +   |      |     |
| yGIL 310 | +   |       |     | +    |     |
| yGIL 322 | +   |       |     |      | +   |
| yGIL 312 | +   |       | +   | +    |     |
| yGIL 324 | +   |       | +   |      | +   |
| yGIL 326 | +   |       | +   | +    | +   |
| yGIL 328 | +   |       | +   | +    | +   |
| yGIL 202 | +   | +     |     |      |     |
| yGIL 308 | +   |       | +   |      |     |
| yGIL 316 | +   |       |     | +    |     |
| yGIL 323 | +   |       |     |      | +   |
| yGIL 318 | +   |       | +   | +    |     |
| yGIL 325 | +   |       | +   |      | +   |
| yGIL 327 | +   |       | +   | +    | +   |
| yGIL 329 | +   |       | +   | +    | +   |
| yGIL 356 | +   | +     |     |      |     |
| yGIL 357 | +   | +     | +   | +    | +   |
| yGIL 358 | +   | +     | +   | +    | +   |
| yGIL 359 | +   | +     | +   | +    | +   |
| yGIL 360 | +   | +     | +   | +    | +   |
| yGIL 361 | +   | +     | +   | +    | +   |
| yGIL 362 | +   | +     | +   | +    | +   |
| yGIL 363 | +   | +     | +   | +    | +   |
| yGIL 364 | +   | +     | +   | +    | +   |
| yGIL 365 | +   |       | +   | +    | +   |

WT }  
 Single Δs }  
 Double Δs } Mat a  
 Triple Δ }  
 WT }  
 Single Δs }  
 Double Δs } Mat α  
 Triple Δ }  
 Diploids }

12/26/08

Note: After 2 extra days of growth I have noticed a few strains growing where I did not expect to see growth:  
 On YPGal: Growth of 322, 324, 326, 328, 323, 325, & 327. Few small colonies on 306, 312 and 365.  
 On Hyg: What looks like a jackpot on 326 & 327  
 On Nat: ~~327~~ What looks like a jackpot on 312 & 316



12/24/08

SUMMARY OF INCORRECT STRAINS

yGIL318: did not genotype properly <sup>(p.26)</sup> - should be 10Δ7Δ but it only looks like 7Δ.

yGIL329: did not genotype properly <sup>(p.26)</sup> - should be 10Δ7Δ1Δ but it only looks like 7Δ. this strain was derived from yGIL318.

Both yGIL318 & yGIL329 have the correct drug markers <sup>(p. 30)</sup>  
↳ one possibility is that this strain duplicated the GAL1/10 region

yGIL357: derived from yGIL329

yGIL364: derived from yGIL318

yGIL365: derived from yGIL329

yGIL360: this is a bit of a puzzle. This strain is a cross between yGIL326 and yGIL308. Although I was, for a time, skeptical that yGIL308 is correct (see p. 26 & 27), I think that it is indeed (p. 28 & 30). The most plausible explanation is the spontaneous loss of KmMX.

12/27/09

MORE STRAIN PHENOTYPING

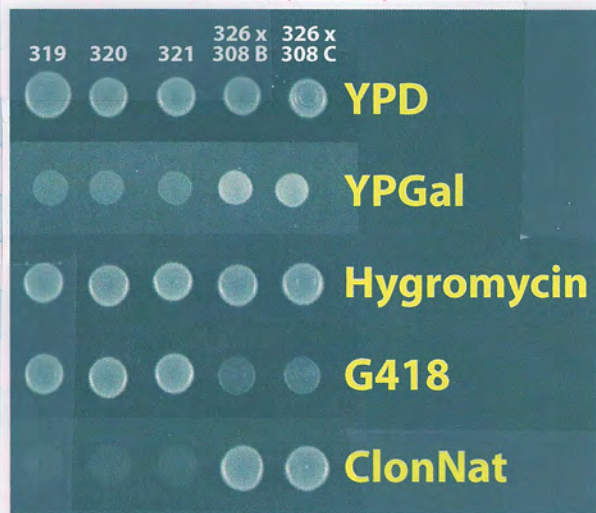

• I streaked from the freezer yGIL319-321 (supposedly isogenic to yGIL318; 10Δ7Δ) and transformed each w/ gal1A::NatMX (p.32) ↳ all 3 strains phenotype correctly

• I also phenotyped the two other <sup>326</sup><sub>308</sub> zygotes I picked on 12/20 (p. 27) ↳ neither ~~phen~~ phenotypes correctly (should be G418<sup>R</sup>) - I will need to redo this cross.



12/26/08

TRANSFORMATION OF yGIL319-321 w/ gal1A::NatMX

- Last night I started 5ml o/p cultures of yGIL319-321
- This morning I made 2 dilutions:
  - 1:100 - 100  $\lambda$  into 10 ml YPD
  - 1:50 - 200  $\lambda$  ----- "

10:45am

Preparation of gal1A::NatMX cassette

- On 12/23 I ran a 100  $\lambda$  PCR of gal1A::NatMX (p. 29)
- ↳ today I PCR purified the cassette → elute in 40  $\lambda$  H<sub>2</sub>O

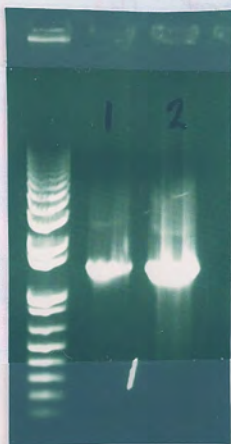

LANE

- 1 gal1A::NatMX new
- 2 ----- from 10/20 (p. 14) ~ I had ~ 21 of those remaining on my bench.

5:45

Coulter count 1:100 dilutions  $\frac{1}{2}$  start transformation

- ~~Bkg~~
- ~~yGIL319~~
- ~~yGIL320~~
- ~~yGIL321~~
- ~~Post Bkg~~

Coulter counter not working

12/27/08

- Last night I overlaid G418, Nat, and Hyg onto 3 YPD plates (p. 14 for conc.)
- Today I replica plated the YPD plates from yesterday.



12/29/08

TRANSFORMATION CONT.

I see a number of colonies on all 3 plates. Today I picked two putative *gal1Δ::NatMX* transformants of *yGIL319-321*. → restreak on YPD

GENOTYPING *yGIL319-321* — primers same as p. 25

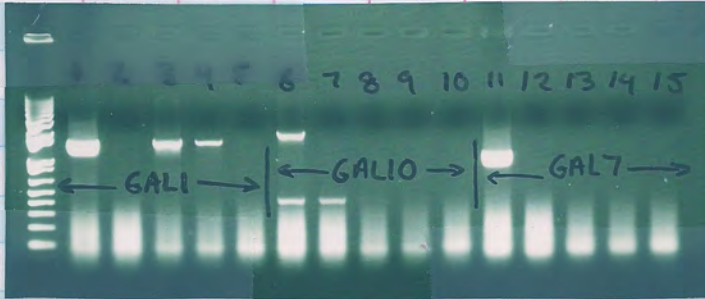

LANE

- 1, 6, 11 - positive control (*yGIL306* or *yGIL310*, secp. 29)
- 2, 7, 12 - negative control (*yGIL328*)
- 3, 8, 13 - *yGIL319*
- 4, 9, 14 - *yGIL320*
- 5, 10, 15 - *yGIL321*

→ *yGIL321* did not genotype properly — should be GAL1.

12/31/08

Last night I started 5 mL o/a cultures of the putative transformant. Today I made *yDNA* preps and genotyped @ GAL1;

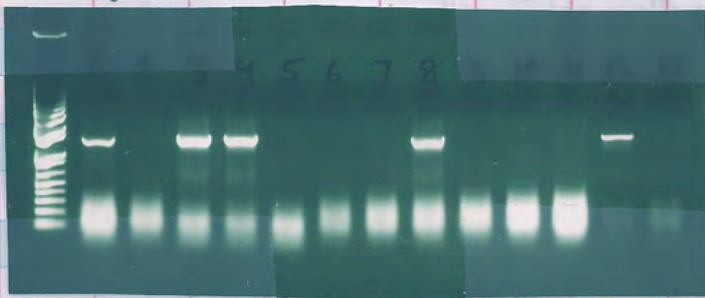

LANE

- 1 *yGIL306* - pos. control
- 2 328 - neg. control
- 3 319
- 4 320
- 5 321
- 6 319 putative transformant A
- 7 319 putative transformant B
- 8 326 putative transformant A
- 9 320 putative transformant B
- 10 321 putative transformant A
- 11 321 putative transformant B
- 12 306 putative *gal1* mutant
- 13 312 putative *gal1* mutant

Freezedown: *yGIL319* putative transformant A ⇒ *yGIL366*  
*yGIL320* putative transformant B ⇒ *yGIL367*

1/2/09

On 12/31 I streaked all 6 putative transformants onto YPD, YPGal, G418, Nat, and Hyg. All 6 phenotyped correctly (although not all genotyped correctly)



12/29/08

## NOTES ON PHENOTYPING

On 12/26 I noted that after <sup>2 days</sup> extra growth I could see strains growing on YPGal plates and drug plates where I didn't expect to see growth (p. 30)

On 12/27 I took pictures of the plates:

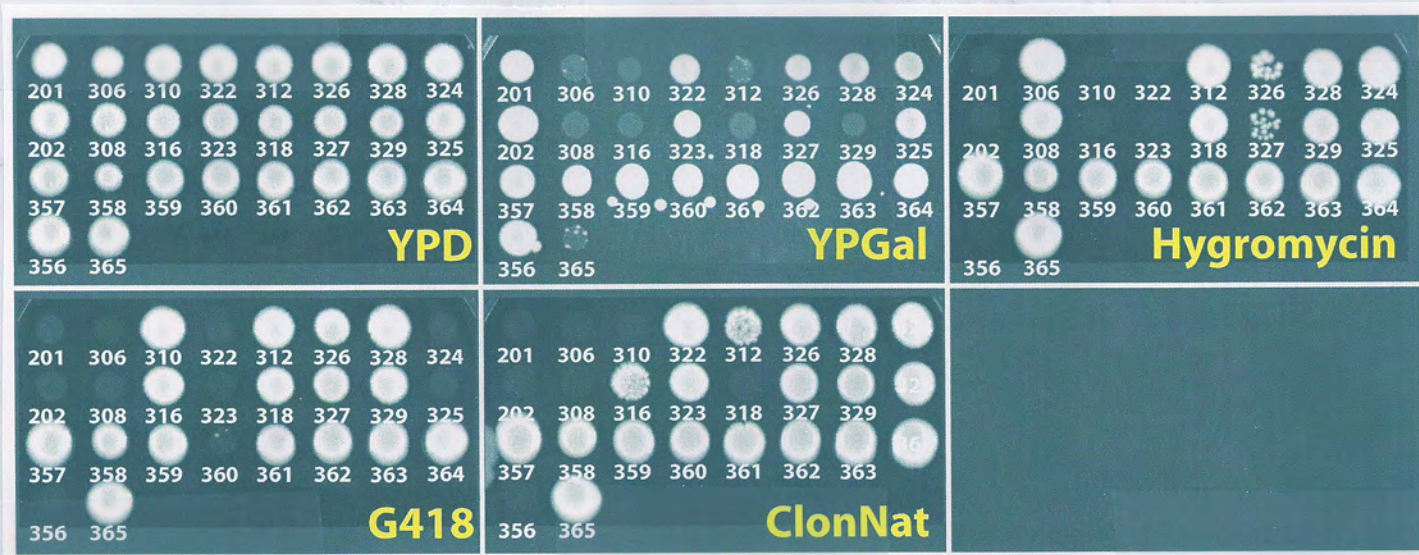

- I can explain the growth on YPGal:
  - After 1 day of growth, only the true Gal<sup>+</sup> strains grow (p. 30)
  - After 3 days of growth, gal<sup>-</sup> strains can grow — presumably using a.a.s or ethanol as a carbon source.
  - However strains that have GAL1 but lack either GAL10 and/or GAL7 will suffer from galactose toxicity.
  - The ~~mutants~~ <sup>colonies</sup> I see growing on the YPGal plates (on an otherwise dead bkg) are most likely GAL1 mutants

1/2/09

- On ~~12/29~~ 12/29, I picked a single colony from the yGIL306 & 312 spots on the YPGal plates and restreaked on YPD. On 12/30 I started a 5 ml o/p from a single colony and on 12/31 I made gDNA preps and amplified GAL1 (lanos 12/13 on p. 33)  
↳ I suspect that both of these are GAL1 mutants — this is supported by the observation that no product was amplified from the yGIL312 putative gal<sup>-</sup> mutant.



1/2/09

SECOND ROUND OF CROSSES

Today I set up a second round of crosses to generate strains that were incorrect in the 1<sup>st</sup> cross (p. 31). In addition I set up crosses to generate FACS reference strains for the fitness assays.

Mata Mata

|                  |                |
|------------------|----------------|
| yGIL322 x        | yGIL319        |
| 322 x            | 320            |
| 201 x            | 366            |
| 201 x            | 367            |
| 328 x            | 366            |
| 328 x            | 367            |
| 326 x            | 308            |
| 214 x            | 207            |
| <del>313</del> x | <del>230</del> |

• Strains yGIL366 & 367 were streaked on 12/31; strains yGIL319 & 320 were streaked on 12/23; all others were streaked on 12/29.

• For the yGIL214 x yGIL207 & yGIL220 x yGIL213, I set up two crosses using independent colonies of each — this is because I have had trouble with the fluorescent strains (particularly w/ GFP)

1/5/09

• This morning I inoculated 5 mL YPD w/ a single diploid colony off of eaches of the cross plates (except 326 x 308, 2 colonies; ~~213 x 220~~, 2 colonies; 214 x 207, 2 colonies per plate)

• This afternoon I spotted 5  $\mu$ l of the gal mutant crosses onto YPD, YPGal, G418, Nat, and Hyg.

• Streak from freezer:

|         |            |
|---------|------------|
| yGIL356 | (wt)       |
| 358     | (cis)      |
| 359     | (7-trans)  |
| 361     | (10-trans) |
| 362     | (10-trans) |
| 363     | (1-trans)  |



1/6/09

PHENOTYPING STRAINS FROM SECOND ROUND OF CROSSES

All 7 galΔ crosses phenotyped correctly - all are resistant ~~to~~ to all 3 drugs and all but the 322x319 and 322x320 are Gal<sup>+</sup>.

Freeze down crosses:

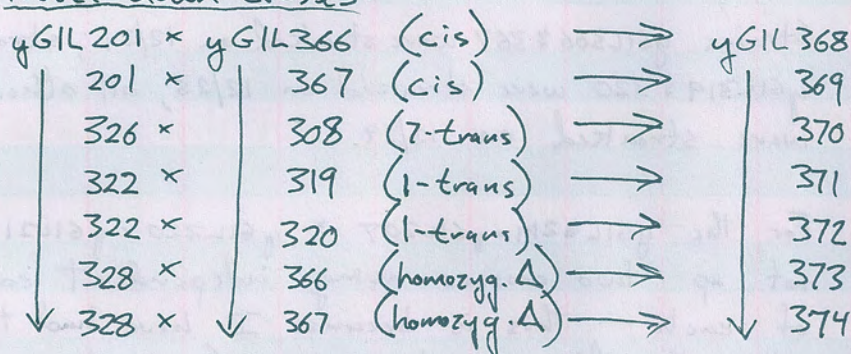

I examined all 6 of the fluorophore crosses under the scope last night and today (after overnight in the fridge in 2 vol. PBST). All appear to be equally fluorescent - previously the haploid GFP strains have appeared to lose fluorescence, but the diploids look fine under the scope - they may still not look great in the FACS - will see.

I froze down two GFP diploids & two ΔTomato diploids  
↪ because of a numbering mixup they are not sequential.

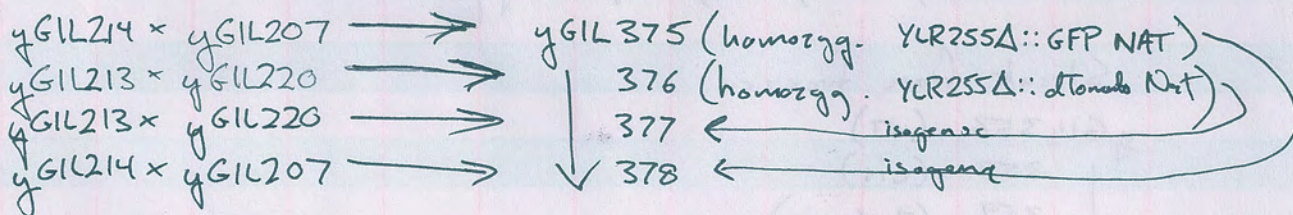



1/7/09

MORE GENOTYPING galΔ STRAINS

I have done PCR to verify the absence of GAL1, 10, & 7 in my Δ strains (p 25, 26, 29, & 33). Here I am using PCR to verify the presence/absence of the drug cassettes. I set up PCRs using the following primer pairs (standard PCR) 25x

43024155 **XX** IDT  
 G.LANG 12/31/2008  
 82587624  
 GAL1\_extF3 121  
 5'-AAA TGG AAA AGC TGC ATA ACC-3'  
 Tm= 51.8 °C, MW= 6,456.3  
 6.5OD<sub>200</sub> 30.00nmol 0.19mg

⊗ NatMX\_intR1 (oGIL006)

43024156 **XX** IDT  
 G.LANG 12/31/2008  
 82587625  
 GAL10\_extF3 122  
 5'-ATG GGG CTC TTT ACA TTT CC-3'  
 Tm= 52.6 °C, MW= 6,074.0  
 7.0OD<sub>200</sub> 38.60nmol 0.23mg

⊗ KanMX\_intR1 (oGIL005)

43024157 **XX** IDT  
 G.LANG 12/31/2008  
 82587626  
 GAL7\_extF3 123  
 5'-TAC AGT GTT CAC AAA ATA GCC-3'  
 Tm= 50.6 °C, MW= 6,398.2  
 7.1OD<sub>200</sub> 33.90nmol 0.22mg

⊗

43024158 **XX** IDT  
 G.LANG 12/31/2008  
 82587627  
 HphMX\_intR1 124  
 5'-GTG AGT TCA GGC TTT TTA CC-3'  
 Tm= 51.4 °C, MW= 6,114.0  
 7.4OD<sub>200</sub> 39.70nmol 0.24mg

MAT<sub>a</sub>

MAT<sub>α</sub>

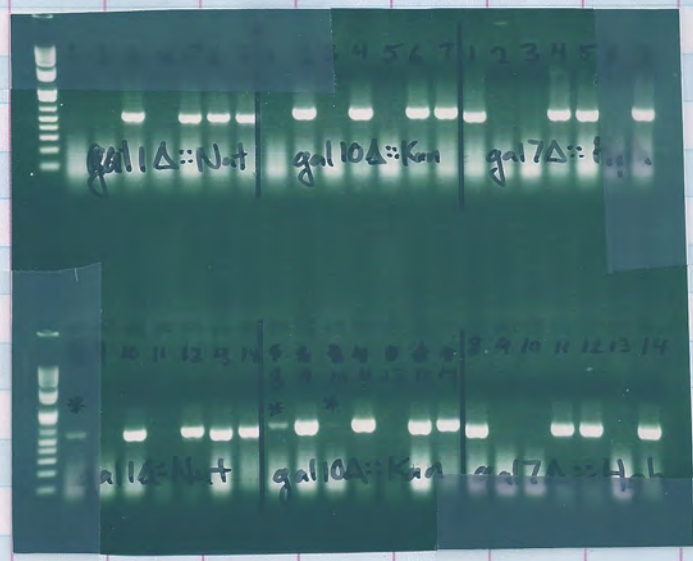

| LANE  |         |           |
|-------|---------|-----------|
| 1     | yGIL306 | 7Δ        |
| 2     | 310     | 10Δ       |
| 3     | 322     | 1Δ        |
| 4     | 312     | 7Δ 10Δ    |
| 5     | 324     | 7Δ 1Δ     |
| 6     | 326     | 10Δ 1Δ    |
| 7     | ↓ 328   | 7Δ 10Δ 1Δ |
| <hr/> |         |           |
| 8     | yGIL308 | 7Δ        |
| 9     | 316     | 10Δ       |
| 10    | 323     | 1Δ        |
| 11    | 319     | 7Δ 10Δ    |
| 12    | 325     | 7Δ 1Δ     |
| 13    | 327     | 10Δ 1Δ    |
| 14    | ↓ 366   | 7Δ 10Δ 1Δ |

\* ambiguous bands - should not have a product if correct.



1/8/09

10/1/1

- from the genotyping yesterday, two strains (yGIL308 & yGIL323) produced ambiguous results (p.38, \*)
- Today I reran the PCRs and found the same result:

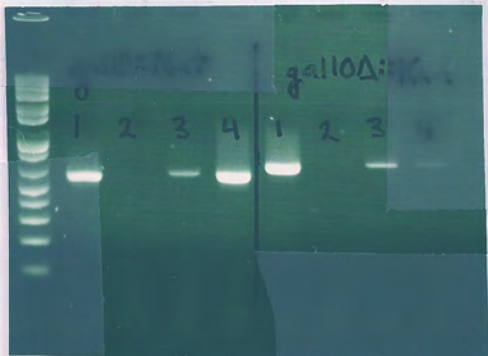

LANE

|   |         |                    |
|---|---------|--------------------|
| 1 | yGIL328 | (positive control) |
| 2 | 306     | (negative control) |
| 3 | 308     |                    |
| 4 | 323     |                    |

- again I see light bands (not true positives) in yGIL308 (gal1 & gal10) and yGIL323 (gal10). Perhaps I should redo the qDNA preps.

|          | GENOTYPE | LANE |
|----------|----------|------|
| Δ1       | 308      | 1    |
| Δ1       | 310      | 2    |
| Δ1       | 323      | 3    |
| Δ1 Δ1    | 312      | 4    |
| Δ1 Δ1    | 324      | 5    |
| Δ1 Δ1    | 326      | 6    |
| Δ1 Δ1 Δ1 | 328      | 7    |
| Δ1       | 308      | 8    |
| Δ1       | 310      | 9    |
| Δ1       | 323      | 10   |
| Δ1 Δ1    | 312      | 11   |
| Δ1 Δ1    | 324      | 12   |
| Δ1 Δ1    | 326      | 13   |
| Δ1 Δ1 Δ1 | 328      | 14   |

} MATα

} MATα

blots - should have done a control



1/7/09

### EXPERIMENTAL PLAN

Now that I have constructed and verified my diploid deletion strains, I want to do fitness assays on these strains in 3 media: Glucose, Galactose, and Glucose/Galactose. Before I do the actual experiment I need to determine a few things: (1) What ~~concentration~~ ratio of Glucose to Galactose should I use in the mixed sugar media? and (2) What dilutions should I do to keep the cells in exponential growth? I will run pilot experiments to address each of these questions.

### PILOT EXPERIMENT 1: GLUCOSE/GALACTOSE MIXTURE

Like previous fitness assays (see "Evolution 1" notebook) I will dilute each tube (a mixture of Exp. & Ref. strains) every 12 h. For the Gluc./Gal. mixed media I would like the switch in carbon source to occur near the 6 h. point. I don't think that the yeast exhaust the sugar by 12 h (I would guess that they use half of their sugar); therefore I would probably want Gluc:Gal  $\sim$  1:4.

- Yesterday I made 0.5L of YPD  $\approx$  YPGal
- Yesterday I streaked yGIL345 (#GALI-GFP, GAL10-mCherry, p 21) from freezer.
- Today I inoculated 5 ml of YPD  $\approx$  YPGal w/ an independent small colony of yGIL345  $\sim$  roller drum  $\sim$  5:00.

1/8/09

|          | Coulter count |            |                   | to get to $10^6$ cells (10 ml) |
|----------|---------------|------------|-------------------|--------------------------------|
| Bkg      | 88000         | 152000     |                   |                                |
| YPD      | $1.554E^8$    | $1.569E^8$ | $\longrightarrow$ | 20 $\lambda$ into 10 ml        |
| YPGal    | $4.945E^7$    | $4.983E^7$ | $\longrightarrow$ | 200 $\lambda$ into 10 ml       |
| Post Bkg | $4.28E^6$     | $2.202E^6$ |                   |                                |



1/8/09

I made 30 ml of each of the following:

- 50% Dextrose, 50% Galactose (15 ml YPD & 15 ml YPGal)
- 30% " , 70% " (9 " 21 " )
- 20% " , 80% " (6 " 24 " )
- 10% " , 90% " (3 " 27 " )

I inoculated 10 ml of the above media w/ either ~~w/~~  $10^6$  cells that were grown overnight in either YPD or YPGal.

→ 11:15 am

After I inoculated the cultures I examined the o/n cultures and found that all cells in YPD were dark and most of the cells in YPGal were expressing GFP & mCherry. Interestingly about ~~25%~~ 25% of the cells in YPGal were not expressing either GFP or mCherry.

Coulter Counts (2:15)

|          |           |                 |
|----------|-----------|-----------------|
| Bkg      | 82000     | 52000           |
| 50 Dex   | $5.002E6$ | 946000 $1.64E6$ |
| 50 YGal  | $3.818E6$ | $3.442E6$       |
| 30 Dex   | $1.148E6$ | $1.052E6$       |
| 30 YGal  | $8.828E6$ | $8.4E6$         |
| 20 Dex   | $4.856E6$ | $4.736E6$       |
| 20 Gal   | $8.838E6$ | $9.212E6$       |
| 10 Dex   | $4.814E6$ | $4.948E6$       |
| 10 Gal   | $8.726E6$ | $9.16E6$        |
| Post Bkg | 254000    | 94000           |

I reran these after I finished w/ the rest

$5.822E6$   $5.946E6$   
 $3.712E6$   
 $1.12E6$

These data seem a bit strange to me - I expected (at this point) that all the "Dex" cultures would be the same and all the "Gal" cultures would be the same.

MICROSCOPY - I looked under the microscope - all "Gal" were still v. bright and all "Dex" dark.



1/8/09

Coulter Counts (5:00pm)

|          |            |            |
|----------|------------|------------|
| Bkg      | 38000      | 20000      |
| 50 Dex   | $1.948E^6$ | $1.786E^6$ |
| 50 Gal   | $1.296E^7$ | $1.289E^7$ |
| 30 Dex   | $2.608E^6$ | $2.562E^6$ |
| 30 Gal   | $1.244E^7$ | $1.262E^7$ |
| 20 Dex   | $2.29E^6$  | $2.2E^6$   |
| 20 Gal   | $1.277E^7$ | $1.334E^7$ |
| 10 Dex   | $1.958E^6$ | $1.604E^6$ |
| 10 Gal   | $1.513E^7$ | $1.49E^7$  |
| Post Bkg | 392000     | 260000     |

- Under the microscope, all of the cultures from the o/N YPD were dark and all from YPGal were still bright

1/9/09

This morning I examined the eight cultures from yesterday under the microscope — all eight were green.

I think that the purdurance of the ~~fast~~ fusion proteins is too high to reliably determine when the genes are turned on.

I am not sure that the mixed glucose/galactose is a good idea — instead I should keep them in the situation where only one sugar is present by alternating between YPD & YPGal.



1/9/09

PILOT EXPERIMENT 2 : DETERMINING DILUTIONS

Last night I inoculated 5 ml YPD and 5 ml YPGal w/ a single large colony of yGIL345 (GALI-GFP, GAL10-mCherry) and yGIL356 (WT)

Today I diluted the ~~glucose~~ YPD cultures 1:300 (30  $\mu$ l into 10 ml <sup>YPD</sup>) and the YPGal 1:300 (30  $\mu$ l into 10 ml YPGal) and 1:100 (100  $\mu$ l into 10 ml YPGal) ~ 11:30.

Coulter Counts (6:00)

|          |               |                     |                     |
|----------|---------------|---------------------|---------------------|
|          | Bkg           | 52000               | 32000               |
| yGIL 345 | YPD 1:300     | 1.119E <sup>7</sup> | 1.174E <sup>7</sup> |
|          | 356 YPD 1:300 | 1.181E <sup>7</sup> | 1.177E <sup>7</sup> |
|          | 345 YPG 1:300 | 2.209E <sup>7</sup> | 2.199E <sup>7</sup> |
|          | 356 YPG 1:300 | 1.797E <sup>7</sup> | 1.754E <sup>7</sup> |
|          | 345 YPG 1:100 | 3.033E <sup>7</sup> | 3.068E <sup>7</sup> |
|          | 356 YPG 1:100 | 3.931E <sup>7</sup> | 3.963E <sup>7</sup> |
|          | Post Bkg      | 1.21E <sup>6</sup>  | 718000              |

I examined the cultures of yGIL345 under the microscope - in the YPD cultures all cells were dark. In YPG almost all cells were bright - there were still a few dark cells but not the ~25% I saw before (p 40)

1:670

Using the ~~1:300~~ dilutions, I set up 16 cultures:

| TUBE  | CURRENT MEDIA | STRAIN   | DILUTED INTO |
|-------|---------------|----------|--------------|
| 1, 9  | YPD           | yGIL 345 | YPD          |
| 2, 10 | ↓             | "        | YPG          |
| 3, 11 |               | 356      | YPD          |
| 4, 12 | ↓             | "        | YPG          |
| 5, 13 |               | 345      | YPD          |
| 6, 14 | ↓             | "        | YPG          |
| 7, 15 |               | 356      | YPD          |
| 8, 16 | ↓             | "        | YPG          |

1:670  
• tubes 1-8: ~~1:300~~ dilution (15  $\mu$ l into 10 ml)

• tubes 9-16: 1:100 dilution (100  $\mu$ l into 10 ml)

→ dilutions @ 6:45 pm



1/10/09

Coulter Counts (6:45 am)

| Bkg      | 72000               | 66000               | Dilution     | Strain        | Previous Media | Current Media | Dilute into |     |     |   |
|----------|---------------------|---------------------|--------------|---------------|----------------|---------------|-------------|-----|-----|---|
| Tube 1   | $2.122 \times 10^7$ | $2.128 \times 10^7$ | 15 $\lambda$ | yGIL345       | YPD            | YPD           | YPD         |     |     |   |
| 2        | $1.78 \times 10^7$  | $1.837 \times 10^7$ | ↓            | "             | ↓              | G             | ↓           |     |     |   |
| 3        | $2.764 \times 10^7$ | $2.738 \times 10^7$ |              | 356           |                | D             |             |     |     |   |
| 4        | $2.178 \times 10^7$ | $2.192 \times 10^7$ |              | "             |                | G             |             |     |     |   |
| 5        | $2.006 \times 10^7$ | $2.014 \times 10^7$ |              | 345           |                | YPGal         |             | D   | YPG |   |
| 6        | $2.194 \times 10^7$ | $2.216 \times 10^7$ |              | "             |                | G             |             |     |     |   |
| 7        | $3.024 \times 10^7$ | $3.036 \times 10^7$ |              | 356           |                | D             |             |     |     |   |
| 8        | $2.107 \times 10^7$ | $2.078 \times 10^7$ |              | ↓             |                | "             |             | ↓   | G   | ↓ |
| 9        | $1.165 \times 10^8$ |                     |              | 100 $\lambda$ |                | 345           |             | YPD | D   |   |
| 10       | $4.427 \times 10^7$ |                     | ↓            | "             | ↓              | G             |             |     |     |   |
| 11       | $1.231 \times 10^8$ |                     |              | 356           |                | D             |             |     |     |   |
| 12       | $4.34 \times 10^7$  |                     |              | "             |                | G             |             |     |     |   |
| 13       | $1.066 \times 10^8$ |                     |              | 345           |                | YPGal         |             | D   |     |   |
| 14       | $6.043 \times 10^7$ |                     |              | "             |                | G             |             |     |     |   |
| 15       | $1.364 \times 10^8$ |                     |              | 356           |                | D             |             |     |     |   |
| 16       | $8.127 \times 10^7$ |                     |              | ↓             |                | "             |             | ↓   | G   |   |
| Post Bkg | $2.194 \times 10^6$ | $1.632 \times 10^6$ |              |               |                |               |             |     |     |   |

- The 1:100 dilutions were too dense so I only counted each once.
- I decided to do a second transfer of tubes 1-8 back into their original media (YPD for 1-4 and YPG for 5-8)
- ↳ dilutions @ 7:30 - the delay is from coulter counting and setting up the next set of tubes

I examined the cells under the microscope. All cultures currently growing in YPD are dark regardless of prior Gal exposure. The YPG → YPG cultures are 100% bright. There were some issues w/ the YPD → YPG cultures; In the ~~1:300~~ 1:670 dilution only about 5% of cells were v. bright - some others appeared to have dim fluorescence. In the more saturated 1:100 dilution about half were bright.

↳ What is going on? It has long been known that even small amounts of glucose w/ will inhibit gal, but they must be using the galactose.



1/10/09

In order to determine if the cells diluted from 2% Glucose could be growing on Y<sub>PG</sub>, at most  $\frac{15\%}{100000} \cdot 2 = 0.003\%$  Glucose, I diluted both y611345 and y611356 from the YPD cultures (i.e. cultures 1 & 3 p. 43) into YP (15  $\mu$ l into 10 ml) — 9:00am rollerdrum

8:15<sup>pm</sup>: No growth in either YP tube

Coulter Count (8:15 pm)

| Blky      | 68000   | 56000   |
|-----------|---------|---------|
| 1         | 3.955E7 | 4.035E7 |
| 2         | 2.803E7 | 2.735E7 |
| 3         | 4.677E7 | 4.637E7 |
| 4         | 3.221E7 | 3.226E7 |
| 5         | 2.438E7 | 2.463E7 |
| 6         | 2.302E7 | 2.304E7 |
| 7         | 2.804E7 | 2.759E7 |
| 8         | 3.184E7 | 3.238E7 |
| Post Blky | 1.248E6 | 634000  |

| STRAIN  | TRANSFERS       |
|---------|-----------------|
| y611345 | YPD → YPD → YPD |
| "       | YPD → YPG → YPD |
| 356     | YPD → YPD → YPD |
| "       | YPD → YPG → YPD |
| 345     | YPG → YPD → YPG |
| "       | YPG → YPG → YPG |
| 356     | YPG → YPD → YPG |
| "       | YPG → YPG → YPG |

MICROSCOPY (8:30 pm)

I kept the YPD → YPG cultures (tubes 2 & 10) in the rollerdrum. Now both tubes look saturated

| TUBE  | % Bright @ 6:45 am, p. 43 | % Bright @ 8:30 pm |
|-------|---------------------------|--------------------|
| dd 2  | ~5%                       | ~90%               |
| dd 10 | ~50%                      | ~90%               |

| TUBE | TRANSFERS       | % Bright @ 8:30 pm     |
|------|-----------------|------------------------|
| 1    | YPD → YPD → YPD | 0 (All dark)           |
| 2    | YPD → YPG → YPD | 0 (All dark)           |
| 5    | YPG → YPD → YPG | many faint, few bright |
| 6    | YPG → YPG → YPG | ~100%                  |



1/12/09

## FITNESS ASSAYS ON GAL MUTANT STRAINS

I have decided to do the fitness assays under 3 conditions (YPD, YPG, and alternating between YPD & YPG)

Streak the following strains onto YPD from freezer:

y61L 356 (WT)  
368 (cis)  
358 (cis)  
359 (7-trans)  
370 (7-trans)  
361 (10-trans)  
362 (10-trans)  
363 (1-trans)  
371 (1-trans)  
373 ( $\Delta$ )  
375 GFP Ref.  
✓ 376 dTomato Ref.

1/13/09

Today I made YPD and YPG media

15g Yeast Extract  
30g Peptone  
30g Dextrose (or Galactose)  
1.5 L H<sub>2</sub>O

→ I used the bulk dispenser to dispense ~10.6 ml in each tube and autoclaved the racks. I made 134 tubes each of YPD (blue caps) and YPG (green caps)



1/14/09

1/12/11

NOTES ON FITNESS ASSAYS

I have decided to do 6 time points instead of the usual 4 — this way I will grow the mixed lines in YPG twice ( $\therefore$  2 YPD  $\rightarrow$  YPG shifts & 2 YPG  $\rightarrow$  YPD shifts)

|      |                  |                 |                 |                 |                 |                 |
|------|------------------|-----------------|-----------------|-----------------|-----------------|-----------------|
|      | (1)              | (2)             | (3)             | (4)             | (5)             | (6)             |
| YPD: | <del>YPD</del> D | $\rightarrow$ D | $\rightarrow$ D | $\rightarrow$ D | $\rightarrow$ D | $\rightarrow$ D |
| ALT: | <del>YPD</del> D | $\rightarrow$ D | $\rightarrow$ G | $\rightarrow$ D | $\rightarrow$ G | $\rightarrow$ D |
| YPG: | <del>YPD</del> G | $\rightarrow$ G | $\rightarrow$ G | $\rightarrow$ G | $\rightarrow$ G | $\rightarrow$ G |

$\uparrow$   
this is the 1:300 following original o/N; max point

Schedule:

I am aiming for 9:30 dilutions

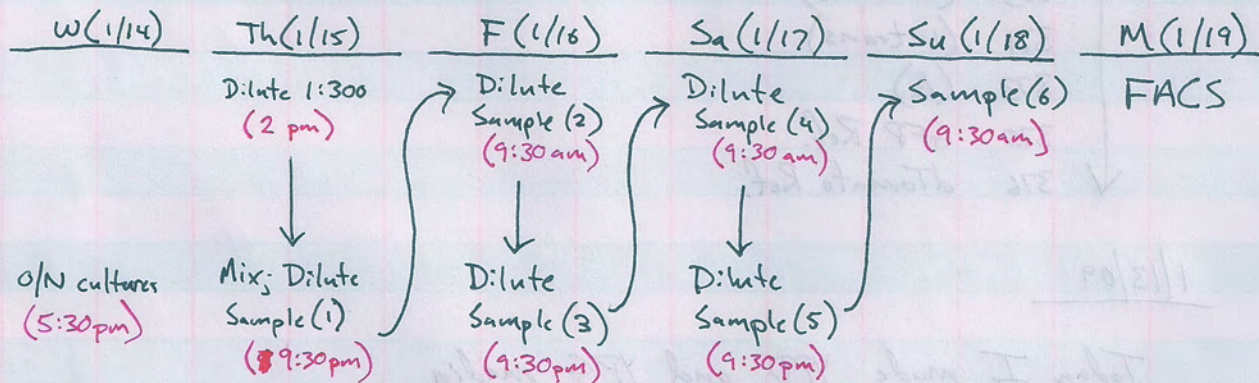

Inoculate 5 ml of YPD and YPG with single colony of the 12 strains on p. 45.

$\rightarrow$  roller drum 5:30



1/15/09

NOTES

- This morning I looked at the cultures — all are fairly dense, except the  $\Delta$  strain in YPG, as expected.

↳ However, I am a bit surprised by how dense this culture is — I will need to watch the culture after the 1:300 dilution — I expect this strain to drop out completely from the YPG fitness assay. There is a clear difference in the density between this and all other cultures → so they are undoubtedly using the galactose.

- I looked at the GFP &  $\Delta$ Tomato cultures under the scope — ~~I~~ I could clearly see fluorescence in all cultures, but it was a little more dim in the YPG cultures, possibly because the cells were at lower density.

→ ~~the~~ Duplicates for  $\Delta$ Tomato Ref.

- 2:00pm - dilute all o/n cultures 1:300 (30  $\mu$ l into 10 mL)
- 3:30pm - I made new 1xPBS (w/ 0.1% Tween) for this experiment.
- I have decided to count each culture once at each dilution — I set aside 33 cuvettes
- Looking by eye at the o/n cultures on my bench, the GFP and  $\Delta$ Tomato are growing more slowly in both YPD & YPG — I will aim for 2:1 ref:exp



1/15/09

Coulter Counts (8:15 pm)

|           |                     |                     |
|-----------|---------------------|---------------------|
| Bkg       | 68000               | 46000               |
| WT-YPD    | 1.411E <sup>7</sup> | 1.462E <sup>7</sup> |
| CIS.1-YPD | 1.035E <sup>7</sup> | 1.036E <sup>7</sup> |
| Ref.1-YPD | 9.958E <sup>6</sup> | 9.842E <sup>6</sup> |
| WT-YPG    | 7.498E <sup>6</sup> | 7.738E <sup>6</sup> |
| CIS.1-YPG | 9.88E <sup>6</sup>  | 1.028E <sup>7</sup> |
| Ref.1-YPG | 7.256E <sup>6</sup> | 7.214E <sup>6</sup> |
| Post Bkg  | 1.41E <sup>6</sup>  | 236 <sup>000</sup>  |

- I should let the cells go through about one more doubling — I will start ~10.
- In ~~the~~ YPD, the fluorescent strains have a disadvantage — it is not clear if that holds true in YPG. I may want the Ref:Exp more like 60:40
- The lack of growth of the  $\Delta$  strain in YPG is very apparent in the 1:300 dilutions.

Coulter Counts (9:30 pm)

|           |                     |                     |
|-----------|---------------------|---------------------|
| Bkg       | 18000               | 38000               |
| WT-YPD    | 1.895E <sup>7</sup> | 1.909E <sup>7</sup> |
| CIS.1-YPD | 1.944E <sup>7</sup> | 1.945E <sup>7</sup> |
| Ref.1-YPD | 1.914E <sup>7</sup> | 1.922E <sup>7</sup> |
| WT-YPG    | 1.234E <sup>7</sup> | 1.24E <sup>7</sup>  |
| CIS.1-YPG | 1.259E <sup>7</sup> | 1.273E <sup>7</sup> |
| Ref.1-YPG | 1.152E <sup>7</sup> | 1.13E <sup>7</sup>  |
| Post Bkg  | 732 <sup>000</sup>  | 260 <sup>000</sup>  |

200  
~~300~~ Exp: 300 Ref

Dilutions @ 10:00 pm

↪ Since the density is a bit low, I did a 1:500 dilution (20  $\mu$  into 10 ml)



1/15/09

Coulter Count (11:30pm)

(1)

|                 | Bkg   | 28000 | 158000               | 22000                |                      |
|-----------------|-------|-------|----------------------|----------------------|----------------------|
| YPD             | WT    | 1     | 2.734 E <sup>7</sup> | 2.698 E <sup>7</sup> |                      |
|                 | CIS.1 | 2     | 2.68 E <sup>7</sup>  | 2.648 E <sup>7</sup> |                      |
|                 | CIS.2 | 3     | 2.707 E <sup>7</sup> | 2.719 E <sup>7</sup> |                      |
|                 | 7.1   | 4     | 2.518 E <sup>7</sup> | 2.455 E <sup>7</sup> |                      |
|                 | 7.2   | 5     | 2.569 E <sup>7</sup> | 2.544 E <sup>7</sup> |                      |
|                 | 10.1  | 6     | 2.975 E <sup>7</sup> | 3.048 E <sup>7</sup> |                      |
|                 | 10.2  | 7     | 2.665 E <sup>7</sup> | 2.625 E <sup>7</sup> |                      |
|                 | 1.1   | 8     | 2.421 E <sup>7</sup> | 2.462 E <sup>7</sup> |                      |
|                 | 1.2   | 9     | 2.572 E <sup>7</sup> | 2.548 E <sup>7</sup> |                      |
|                 | Δ     | 10    | 2.463 E <sup>7</sup> | 2.454 E <sup>7</sup> |                      |
|                 | GFP   | 11    | 2.508 E <sup>7</sup> | 2.505 E <sup>7</sup> |                      |
| YPG             | WT    | 12    | 1.542 E <sup>7</sup> | 1.542 E <sup>7</sup> |                      |
|                 | CIS.1 | 13    | 1.49 E <sup>7</sup>  | 1.49 E <sup>7</sup>  |                      |
|                 | CIS.2 | 14    | 1.436 E <sup>7</sup> | 1.455 E <sup>7</sup> |                      |
|                 | 7.1   | 15    | 1.413 E <sup>7</sup> | 1.437 E <sup>7</sup> |                      |
|                 | 7.2   | 16    | 1.563 E <sup>7</sup> | 1.539 E <sup>7</sup> |                      |
|                 | 10.1  | 17    | 1.55 E <sup>7</sup>  | 1.513 E <sup>7</sup> |                      |
|                 | 10.2  | 18    | 1.536 E <sup>7</sup> | 1.508 E <sup>7</sup> |                      |
|                 | 1.1   | 19    | 1.527 E <sup>7</sup> | 1.462 E <sup>7</sup> | 1.528 E <sup>7</sup> |
|                 | 1.2   | 20    | 1.443 E <sup>7</sup> | 1.432 E <sup>7</sup> |                      |
|                 | Δ     | 21    | 9.672 E <sup>6</sup> | 9.684 E <sup>6</sup> |                      |
|                 | GFP   | 22    | 1.647 E <sup>7</sup> | 1.301 E <sup>7</sup> | 1.269 E <sup>7</sup> |
| ALT<br>(in YPD) | WT    | 23    | 2.75 E <sup>7</sup>  | 2.838 E <sup>7</sup> |                      |
|                 | CIS.1 | 24    | 3.216 E <sup>7</sup> | 3.221 E <sup>7</sup> |                      |
|                 | CIS.2 | 25    | 2.922 E <sup>7</sup> | 2.882 E <sup>7</sup> |                      |
|                 | 7.1   | 26    | 2.523 E <sup>7</sup> | 2.54 E <sup>7</sup>  |                      |
|                 | 7.2   | 27    | 2.516 E <sup>7</sup> | 2.476 E <sup>7</sup> |                      |
|                 | 10.1  | 28    | 2.804 E <sup>7</sup> | 2.866 E <sup>7</sup> |                      |
|                 | 10.2  | 29    | 2.368 E <sup>7</sup> | 2.336 E <sup>7</sup> |                      |
|                 | 1.1   | 30    | 2.548 E <sup>7</sup> | 2.531 E <sup>7</sup> |                      |
|                 | 1.2   | 31    | 2.717 E <sup>7</sup> | 2.721 E <sup>7</sup> |                      |
|                 | Δ     | 32    | 2.618 E <sup>7</sup> | 2.602 E <sup>7</sup> |                      |
|                 | GFP   | 33    | 2.221 E <sup>7</sup> | 2.263 E <sup>7</sup> |                      |

Post Bkg 666000 558000



1/16/09

Gal cultures look dilute

Test Count (9:40 am)

|          |            |            |
|----------|------------|------------|
| Bkg      | 254000     | 190000     |
| WT-YPD   | $3.284E^7$ | $3.406E^7$ |
| WT-GAL   | $4.656E^6$ | $4.308E^6$ |
| Post Bkg | 510000     | 214000     |

I will dilute 15 $\lambda$  from YPD cultures (into either YPD or YPG - for alternating culture) and 100 $\lambda$  from YPG.

Dilutions 10:00 am

sample 500 $\lambda$  from YPD & 1ml from YPG

Counter Count (11:00 am)

(2)

Bkg 62000 66000

|              |             |            |            |            |
|--------------|-------------|------------|------------|------------|
| YPD          | WT 1        | $3.775E^7$ | $3.785E^7$ |            |
|              | CIS.1 2     | $3.893E^7$ | $3.844E^7$ |            |
|              | CIS.2 3     | $4.041E^7$ | $4.011E^7$ |            |
|              | 7.1 4       | $3.669E^7$ | $3.669E^7$ |            |
|              | 7.2 5       | $3.83E^7$  | $3.755E^7$ |            |
|              | 10.1 6      | $3.611E^7$ | $3.557E^7$ |            |
|              | 10.2 7      | $3.744E^7$ | $3.755E^7$ |            |
|              | 1.1 8       | $3.662E^7$ | $3.644E^7$ |            |
|              | 1.2 9       | $3.736E^7$ | $3.753E^7$ |            |
|              | $\Delta$ 10 | $3.441E^7$ | $3.445E^7$ |            |
| GFP 11       | $3.66E^7$   | $3.612E^7$ |            |            |
| YPG          | WT 12       | $5.448E^6$ | $4.64E^6$  | $4.766E^6$ |
|              | CIS.1 13    | $4.23E^6$  | $4.374E^6$ |            |
|              | CIS.2 14    | $4.428E^6$ | $4.332E^6$ |            |
|              | 7.1 15      | $4.398E^6$ | $4.348E^6$ |            |
|              | 7.2 16      | $4.416E^6$ | $4.324E^6$ |            |
|              | 10.1 17     | $4.376E^6$ | $5.192E^6$ | $4.614E^6$ |
|              | 10.2 18     | $4.576E^6$ | $4.588E^6$ |            |
|              | 1.1 19      | $4.538E^6$ | $4.406E^6$ |            |
|              | 1.2 20      | $4.432E^6$ | $4.424E^6$ |            |
|              | $\Delta$ 21 | $2.588E^6$ | $2.424E^6$ |            |
| GFP 22       | $3.792E^6$  | $3.908E^6$ |            |            |
| ALT (in YPD) | WT 23       | $3.622E^7$ | $3.633E^7$ |            |
|              | CIS.1 24    | $3.679E^7$ | $3.653E^7$ |            |
|              | CIS.2 25    | $3.452E^7$ | $3.53E^7$  |            |

CONT. ON p 51



1/16/09

Coulter Counts continued

|                 |          |    |            |            |
|-----------------|----------|----|------------|------------|
| ALT<br>(in YPD) | 7.1      | 26 | $3.564E^7$ | $3.554E^7$ |
|                 | 7.2      | 27 | $3.547E^7$ | $3.55E^7$  |
|                 | 10.1     | 28 | $3.624E^7$ | $3.634E^7$ |
|                 | 10.2     | 29 | $3.814E^7$ | $3.823E^7$ |
|                 | 1.1      | 30 | $3.287E^7$ | $3.413E^7$ |
|                 | 1.2      | 31 | $3.576E^7$ | $3.527E^7$ |
|                 | $\Delta$ | 32 | $3.427E^7$ | $3.455E^7$ |
|                 | GFP      | 33 | $3.455E^7$ | $3.402E^7$ |
|                 | Post Blg |    | $1.108E^6$ | 718000     |

NOTES

I have been following the general practices of fitness assays that I used previously (see "Evolution I" notebook):

- I am keeping all of the media in the 30° room (prewarmed)
- I have been keeping several racks in the 30° room as well

⇒

I have been taking ~ 1.5 h to complete diluting, sampling, and counting — this is about twice as long as I recall it taking before — this is because I am doing much more sonicating and counting. The dilutions themselves only take ~ 10 min.

I have been doing the dilutions, sampling and counting in this order:

- Dilutions (put back on roller drum as soon as possible)
- Sample 10 $\mu$ l for Coulter Counter
- Sample 0.5-1 ml for FACS
- Spin down; aspirate; resus. in 1 ml PBST; vortex; 4°
- sonicate
- count

1/17/09

(p. 46)

Because of the way I started the expt, the YPD  $\Delta$  ALT started from the same colony (initially inoculated into YPD for o/n) and the YPG culture from another colony (inoculated into YPG for o/n)



1/16/09

Test Counts (9:30 pm)

| Bkg      | 462000              | 682000              | Dilution                                                       |
|----------|---------------------|---------------------|----------------------------------------------------------------|
| WT-YPD   | $3.115 \times 10^7$ | $3.152 \times 10^7$ | → 15 $\lambda$ (into YPD); expect $3-3.5 \times 10^7$ in 12 h  |
| WT-YPG   | $4.258 \times 10^6$ | $4.188 \times 10^6$ | → 200 $\lambda$ (into YPG); expect $0.8-1 \times 10^7$ in 12 h |
| WT-ALT   | $3.178 \times 10^6$ | $3.202 \times 10^6$ | → 100 $\lambda$ (into YPD); expect $3-3.5 \times 10^7$ in 12 h |
| Post Bkg | $1.21 \times 10^6$  | 932000              |                                                                |

- Agam I will sample 500  $\lambda$  from YPD and 1 mL from YPG
- Dilutions — 10 pm

Coulter Count (11 pm)

(3)

|     | Bkg | 24000               | 42000               |                           |
|-----|-----|---------------------|---------------------|---------------------------|
| YPD | 1   | $3.656 \times 10^7$ | $3.719 \times 10^7$ | WT                        |
|     | 2   | $3.657 \times 10^7$ | $3.587 \times 10^7$ | CIS.1                     |
|     | 3   | $3.856 \times 10^7$ | $3.864 \times 10^7$ | CIS.2                     |
|     | 4   | $3.619 \times 10^7$ | $3.594 \times 10^7$ | 7.1                       |
|     | 5   | $3.747 \times 10^7$ | $3.788 \times 10^7$ | 7.2                       |
|     | 6   | $3.603 \times 10^7$ | $3.658 \times 10^7$ | 10.1                      |
|     | 7   | $3.736 \times 10^7$ | $3.701 \times 10^7$ | 10.2                      |
|     | 8   | $3.814 \times 10^7$ | $3.815 \times 10^7$ | 1.1                       |
|     | 9   | $3.521 \times 10^7$ | $3.543 \times 10^7$ | 1.2                       |
|     | 10  | $3.59 \times 10^7$  | $3.553 \times 10^7$ | $\Delta$                  |
|     | 11  | $3.644 \times 10^7$ | $3.599 \times 10^7$ | GFP                       |
| YPG | 12  | $5.856 \times 10^6$ | $5.732 \times 10^6$ | WT                        |
|     | 13  | $5.104 \times 10^6$ | $4.716 \times 10^6$ | $4.458 \times 10^6$ CIS.1 |
|     | 14  | $4.85 \times 10^6$  | $4.528 \times 10^6$ | CIS.2                     |
|     | 15  | $5.082 \times 10^6$ | $4.958 \times 10^6$ | 7.1                       |
|     | 16  | $5.82 \times 10^6$  | $5.406 \times 10^6$ | 7.2                       |
|     | 17  | $5.354 \times 10^6$ | $5.206 \times 10^6$ | 10.1                      |
|     | 18  | $4.91 \times 10^6$  | $4.84 \times 10^6$  | 10.2                      |
|     | 19  | $4.912 \times 10^6$ | $4.776 \times 10^6$ | 1.1                       |
|     | 20  | $4.394 \times 10^6$ | $4.616 \times 10^6$ | 1.2                       |
|     | 21  | $2.622 \times 10^6$ | $2.466 \times 10^6$ | $\Delta$                  |
|     | 22  | $4.35 \times 10^6$  | $4.45 \times 10^6$  | GFP                       |

CONTINUED ON P. 53 →



1/16/09

Coulter Counts Continued

|                 |          |                     |                     |                         |
|-----------------|----------|---------------------|---------------------|-------------------------|
| ALT<br>(in YPG) | 23       | $3.554 \times 10^6$ | $3.296 \times 10^6$ | WT                      |
|                 | 24       | $3.122 \times 10^6$ | $3.034 \times 10^6$ | CIS.1                   |
|                 | 25       | $2.954 \times 10^6$ | $3.004 \times 10^6$ | CIS.2                   |
|                 | 26       | $2.89 \times 10^6$  | $2.896 \times 10^6$ | 7.1                     |
|                 | 27       | $3.054 \times 10^6$ | $2.862 \times 10^6$ | 7.2                     |
|                 | 28       | $2.994 \times 10^6$ | $2.876 \times 10^6$ | 10.1                    |
|                 | 29       | $2.97 \times 10^6$  | $3.092 \times 10^6$ | 10.2                    |
|                 | 30       | $3.116 \times 10^6$ | $2.762 \times 10^6$ | $2.768 \times 10^6$ 1.1 |
|                 | 31       | $3.016 \times 10^6$ | $3.074 \times 10^6$ | 1.2                     |
|                 | 32       | $2.528 \times 10^6$ | $2.398 \times 10^6$ | $\Delta$                |
|                 | 33       | $2.8 \times 10^6$   | $3.066 \times 10^6$ | $2.952 \times 10^6$ GFP |
|                 | Post Bkg | 82000               | 104000              |                         |

1/17/09

Test Counts (9:30 am)

DILUTIONS (10 am)

|          |                     |                     |                                                                     |
|----------|---------------------|---------------------|---------------------------------------------------------------------|
| Bkg      | 50000               | 56000               |                                                                     |
| WT-YPD   | $2.721 \times 10^7$ | $2.734 \times 10^7$ | $\rightarrow 15 \lambda$ (into YPD); expect $3 \times 10^7$ in 12h  |
| WT-YPG   | $7.274 \times 10^6$ | $7.29 \times 10^6$  | $\rightarrow 100 \lambda$ (into YPG); expect $1 \times 10^7$ in 12h |
| WT-ACT   | $1.09 \times 10^7$  | $1.093 \times 10^7$ | $\rightarrow 100 \lambda$ (into YPG); expect $1 \times 10^7$ in 12h |
| Post Bkg | 374000              | 192000              |                                                                     |

Coulter Counts (11 am)

(4)

|     |                     |                     |                     |          |
|-----|---------------------|---------------------|---------------------|----------|
| YPD | Bkg                 | 36000               | 44000               |          |
|     | 1                   | $3.495 \times 10^7$ | $3.482 \times 10^7$ | WT       |
|     | 2                   | $3.318 \times 10^7$ | $3.365 \times 10^7$ | CIS.1    |
|     | 3                   | $3.442 \times 10^7$ | $3.459 \times 10^7$ | CIS.2    |
|     | 4                   | $3.347 \times 10^7$ | $3.303 \times 10^7$ | 7.1      |
|     | 5                   | $3.419 \times 10^7$ | $3.305 \times 10^7$ | 7.2      |
|     | 6                   | $3.251 \times 10^7$ | $3.197 \times 10^7$ | 10.1     |
|     | 7                   | $3.23 \times 10^7$  | $3.175 \times 10^7$ | 10.2     |
|     | 8                   | $3.105 \times 10^7$ | $3.083 \times 10^7$ | 1.1      |
|     | 9                   | $3.14 \times 10^7$  | $3.14 \times 10^7$  | 1.2      |
|     | 10                  | $2.868 \times 10^7$ | $2.836 \times 10^7$ | $\Delta$ |
| 11  | $3.295 \times 10^7$ | $3.287 \times 10^7$ | GFP                 |          |

CONTINUED ON p. 54



1/17/09

1/17/09

Coulter Count cont.

|                 |                     |                     |                     |                     |       |
|-----------------|---------------------|---------------------|---------------------|---------------------|-------|
| YPG             | 12                  | 8.552E <sup>6</sup> | 1.146E <sup>7</sup> | 9.154E <sup>6</sup> | WT    |
|                 | 13                  | 8.2E <sup>6</sup>   | 8.016E <sup>6</sup> |                     | CIS.1 |
|                 | 14                  | 6.866E <sup>6</sup> | 6.74E <sup>6</sup>  |                     | CIS.2 |
|                 | 15                  | 7.598E <sup>6</sup> | 7.646E <sup>6</sup> |                     | 7.1   |
|                 | 16                  | 8.564E <sup>6</sup> | 8.37E <sup>6</sup>  |                     | 7.2   |
|                 | 17                  | 7.968E <sup>6</sup> | 7.802E <sup>6</sup> |                     | 10.1  |
|                 | 18                  | 7.764E <sup>6</sup> | 6.884E <sup>6</sup> | 7.06E <sup>6</sup>  | 10.2  |
|                 | 19                  | 7.028E <sup>6</sup> | 7.276E <sup>6</sup> |                     | 1.1   |
|                 | 20                  | 7.036E <sup>6</sup> | 7.04E <sup>6</sup>  |                     | 1.2   |
|                 | 21                  | 3.76E <sup>6</sup>  | 3.898E <sup>6</sup> |                     | Δ     |
| 22              | 6.952E <sup>6</sup> | 6.28E <sup>6</sup>  |                     | GFP                 |       |
| ALT<br>(in YPD) | 23                  | 1.414E <sup>7</sup> | 1.38E <sup>7</sup>  |                     | WT    |
|                 | 24                  | 1.321E <sup>7</sup> | 1.315E <sup>7</sup> |                     | CIS.1 |
|                 | 25                  | 1.168E <sup>7</sup> | 1.142E <sup>7</sup> |                     | CIS.2 |
|                 | 26                  | 1.219E <sup>7</sup> | 1.226E <sup>7</sup> |                     | 7.1   |
|                 | 27                  | 1.283E <sup>7</sup> | 1.288E <sup>7</sup> |                     | 7.2   |
|                 | 28                  | 1.175E <sup>7</sup> | 1.188E <sup>7</sup> |                     | 10.1  |
|                 | 29                  | 1.233E <sup>7</sup> | 1.264E <sup>7</sup> |                     | 10.2  |
|                 | 30                  | 1.07E <sup>7</sup>  | 1.061E <sup>7</sup> |                     | 1.1   |
|                 | 31                  | 1.228E <sup>7</sup> | 1.187E <sup>7</sup> |                     | 1.2   |
|                 | 32                  | 9.574E <sup>6</sup> | 9.938E <sup>6</sup> |                     | Δ     |
|                 | 33                  | 1.315E <sup>7</sup> | 1.278E <sup>7</sup> |                     | GFP   |

Port Bkg 290000 282000

Coulter Count cont.

|    |                     |                     |  |  |
|----|---------------------|---------------------|--|--|
| 23 | 3.221E <sup>6</sup> | 3.122E <sup>6</sup> |  |  |
| 24 | 3.133E <sup>6</sup> | 3.133E <sup>6</sup> |  |  |
| 25 | 3.041E <sup>6</sup> | 3.121E <sup>6</sup> |  |  |
| 26 | 3.246E <sup>6</sup> | 3.28E <sup>6</sup>  |  |  |
| 27 | 3.021E <sup>6</sup> | 3.020E <sup>6</sup> |  |  |
| 28 | 3.141E <sup>6</sup> | 3.141E <sup>6</sup> |  |  |
| 29 | 3.043E <sup>6</sup> | 3.043E <sup>6</sup> |  |  |
| 30 | 3.112E <sup>6</sup> | 3.112E <sup>6</sup> |  |  |
| 31 | 3.014E <sup>6</sup> | 3.010E <sup>6</sup> |  |  |
| 32 | 3.238E <sup>6</sup> | 3.238E <sup>6</sup> |  |  |
| 33 | 3.011E <sup>6</sup> | 3.011E <sup>6</sup> |  |  |

ALT  
(in YPD)

Test Counts (1-30 min)

|    |       |       |  |  |
|----|-------|-------|--|--|
| 23 | 20000 | 20000 |  |  |
| 24 | 20000 | 20000 |  |  |
| 25 | 20000 | 20000 |  |  |
| 26 | 20000 | 20000 |  |  |
| 27 | 20000 | 20000 |  |  |
| 28 | 20000 | 20000 |  |  |
| 29 | 20000 | 20000 |  |  |
| 30 | 20000 | 20000 |  |  |
| 31 | 20000 | 20000 |  |  |
| 32 | 20000 | 20000 |  |  |
| 33 | 20000 | 20000 |  |  |

Coulter Count (11 min)

|    |                     |                     |  |  |
|----|---------------------|---------------------|--|--|
| 1  | 3.142E <sup>7</sup> | 3.182E <sup>7</sup> |  |  |
| 2  | 3.38E <sup>7</sup>  | 3.38E <sup>7</sup>  |  |  |
| 3  | 3.412E <sup>7</sup> | 3.412E <sup>7</sup> |  |  |
| 4  | 3.311E <sup>7</sup> | 3.303E <sup>7</sup> |  |  |
| 5  | 3.41E <sup>7</sup>  | 3.35E <sup>7</sup>  |  |  |
| 6  | 3.251E <sup>7</sup> | 3.412E <sup>7</sup> |  |  |
| 7  | 3.23E <sup>7</sup>  | 3.12E <sup>7</sup>  |  |  |
| 8  | 3.102E <sup>7</sup> | 3.083E <sup>7</sup> |  |  |
| 9  | 3.11E <sup>7</sup>  | 3.11E <sup>7</sup>  |  |  |
| 10 | 3.283E <sup>7</sup> | 3.283E <sup>7</sup> |  |  |
| 11 | 3.22E <sup>7</sup>  | 3.281E <sup>7</sup> |  |  |

YPD

CONTINUED ON p. 24



1/17/09

→ As usual @ 10pm

| Test Counts (9:30 pm) |                     |                     | DILUTIONS                                 | Sample |
|-----------------------|---------------------|---------------------|-------------------------------------------|--------|
| Bkg                   | 342000              | 166000              |                                           |        |
| WT-YPD                | $2.323 \times 10^7$ | $2.298 \times 10^7$ | 15 $\lambda$ (into YPD)                   | 0.5 mL |
| WT-YPG                | $5.742 \times 10^6$ | $5.26 \times 10^6$  | <del>150</del><br>15 $\lambda$ (into YPG) | 1 mL   |
| WT-ALT                | $9.738 \times 10^6$ | $1.007 \times 10^7$ | 15 $\lambda$ (into YPD)                   | 0.5 mL |
| Post Bkg              | $1.258 \times 10^6$ | 256000              |                                           |        |

Coulter Counts (11 pm) (5)

|                 | Bkg | 286000              | 230000              |                           |
|-----------------|-----|---------------------|---------------------|---------------------------|
| YPD             | 1   | $2.83 \times 10^7$  | $2.861 \times 10^7$ | WT                        |
|                 | 2   | $2.882 \times 10^7$ | $2.875 \times 10^7$ | CIS.1                     |
|                 | 3   | $2.833 \times 10^7$ | $2.884 \times 10^7$ | CIS.2                     |
|                 | 4   | $2.817 \times 10^7$ | $2.773 \times 10^7$ | 7.1                       |
|                 | 5   | $2.907 \times 10^7$ | $2.906 \times 10^7$ | 7.2                       |
|                 | 6   | $2.746 \times 10^7$ | $2.707 \times 10^7$ | 10.1                      |
|                 | 7   | $2.794 \times 10^7$ | $2.805 \times 10^7$ | 10.2                      |
|                 | 8   | $2.615 \times 10^7$ | $2.626 \times 10^7$ | 1.1                       |
|                 | 9   | $2.633 \times 10^7$ | $2.635 \times 10^7$ | 1.2                       |
|                 | 10  | $2.549 \times 10^7$ | $2.507 \times 10^7$ | $\Delta$                  |
|                 | 11  | $2.724 \times 10^7$ | $2.737 \times 10^7$ | GFP                       |
| YPG             | 12  | $6.738 \times 10^6$ | $6.472 \times 10^6$ | $6.318 \times 10^6$ WT    |
|                 | 13  | $6.84 \times 10^6$  | $6.414 \times 10^6$ | $6.294 \times 10^6$ CIS.1 |
|                 | 14  | $4.966 \times 10^6$ | $4.99 \times 10^6$  | CIS.2                     |
|                 | 15  | $6.142 \times 10^6$ | $5.782 \times 10^6$ | 7.1                       |
|                 | 16  | $6.502 \times 10^6$ | $6.284 \times 10^6$ | 7.2                       |
|                 | 17  | $5.394 \times 10^6$ | $5.502 \times 10^6$ | 10.1                      |
|                 | 18  | $4.924 \times 10^6$ | $5.456 \times 10^6$ | $5.094 \times 10^6$ 10.2  |
|                 | 19  | $5.25 \times 10^6$  | $5.22 \times 10^6$  | 1.1                       |
|                 | 20  | $5.09 \times 10^6$  | $5.134 \times 10^6$ | 1.2                       |
|                 | 21  | $2.8 \times 10^6$   | $2.848 \times 10^6$ | $\Delta$                  |
|                 | 22  | $4.718 \times 10^6$ | $4.532 \times 10^6$ | GFP                       |
| ALT<br>(in YPG) | 23  | $1.189 \times 10^7$ | $1.121 \times 10^7$ | WT                        |
|                 | 24  | $1.04 \times 10^7$  | $1.026 \times 10^7$ | CIS.1                     |
|                 | 25  | $9.55 \times 10^6$  | $9.29 \times 10^6$  | CIS.2                     |
|                 | 26  | $9.81 \times 10^6$  | $9.64 \times 10^6$  | 7.1                       |
|                 | 27  | $9.858 \times 10^6$ | $1.046 \times 10^7$ | 7.2                       |
|                 | 28  | $9.674 \times 10^6$ | $1.007 \times 10^7$ | 10.1                      |



1/17/09

Coulter Counts CONT.

|                 |          |                     |                     |      |
|-----------------|----------|---------------------|---------------------|------|
| ALT<br>(in YPG) | 29       | 1.066E <sup>7</sup> | 1.098E <sup>7</sup> | 10.2 |
|                 | 30       | 8.644E <sup>6</sup> | 8.588E <sup>6</sup> | 1.1  |
|                 | 31       | 9.888E <sup>6</sup> | 9.614E <sup>6</sup> | 1.2  |
|                 | 32       | 8.218E <sup>6</sup> | 8.122E <sup>6</sup> | Δ    |
|                 | 33       | 1.045E <sup>7</sup> | 1.044E <sup>7</sup> | GFP  |
|                 | Post Bkg | 326000              | 268000              |      |

1/18/09

Sample 0.5 ml from YPD ~~ALT~~ 3 ml from YPG  $\approx$  ALT

Coulter Counts (10:45 am) (6)

|     | Bkg | 104000              | 218000              |                                         |
|-----|-----|---------------------|---------------------|-----------------------------------------|
| YPD | 1   | 2.381E <sup>7</sup> | 2.456E <sup>7</sup> | WT                                      |
|     | 2   | 2.347E <sup>7</sup> | 2.336E <sup>7</sup> | CIS.1                                   |
|     | 3   | 2.356E <sup>7</sup> | 2.357E <sup>7</sup> | CIS.2                                   |
|     | 4   | 2.279E <sup>7</sup> | 2.278E <sup>7</sup> | 7.1                                     |
|     | 5   | 2.165E <sup>7</sup> | 2.254E <sup>7</sup> | 7.2                                     |
|     | 6   | 2.102E <sup>7</sup> | 2.094E <sup>7</sup> | 10.1                                    |
|     | 7   | 2.23E <sup>7</sup>  | 2.212E <sup>7</sup> | 10.2                                    |
|     | 8   | 2.102E <sup>7</sup> | 2.139E <sup>7</sup> | 1.1                                     |
|     | 9   | 2.12E <sup>7</sup>  | 2.094E <sup>7</sup> | 1.2                                     |
|     | 10  | 1.902E <sup>7</sup> | 1.945E <sup>7</sup> | Δ                                       |
|     | 11  | 2.146E <sup>7</sup> | 2.142E <sup>7</sup> | GFP                                     |
| YPG | 12  | 6.982E <sup>6</sup> | 6.814E <sup>6</sup> | WT                                      |
|     | 13  | 6.3E <sup>6</sup>   | 6.01E <sup>6</sup>  | 5.916E <sup>6</sup> <del>WT</del> CIS.1 |
|     | 14  | 5.282E <sup>6</sup> | 4.986E <sup>6</sup> | <del>WT</del> CIS.2                     |
|     | 15  | 5.572E <sup>6</sup> | 5.25E <sup>6</sup>  | <del>WT</del> 7.1                       |
|     | 16  | 6.996E <sup>6</sup> | 7.128E <sup>6</sup> | <del>WT</del> 7.2 Δ                     |
|     | 17  | 5.432E <sup>6</sup> | 5.54E <sup>6</sup>  | <del>WT</del> 10.1                      |
|     | 18  | 5.496E <sup>6</sup> | 5.37E <sup>6</sup>  | <del>WT</del> 10.2                      |
|     | 19  | 5.148E <sup>6</sup> | 5.146E <sup>6</sup> | <del>WT</del> 1.1                       |
|     | 20  | 5.514E <sup>6</sup> | 5.23E <sup>6</sup>  | <del>WT</del> 1.2                       |
|     | 21  | 3.3E <sup>6</sup>   | 3.574E <sup>6</sup> | <del>WT</del> Δ                         |
|     | 22  | 5.274E <sup>6</sup> | 5.362E <sup>6</sup> | GFP                                     |



1/18/09

Coulter Counts Continued

ALT  
(in YPD)

|          |         |         |            |
|----------|---------|---------|------------|
| 23       | 6.892E6 | 6.98E6  | WT         |
| 24       | 5.98E6  | 5.654E6 | CIS.1      |
| 25       | 5.176E6 | 4.91E6  | CIS.2      |
| 26       | 5.196E6 | 4.876E6 | 4.93E6 7.1 |
| 27       | 5.04E6  | 5.006E6 | 7.2        |
| 28       | 5.03E6  | 4.886E6 | 10.1       |
| 29       | 5.656E6 | 5.714E6 | 10.2       |
| 30       | 4.91E6  | 4.82E6  | 1.1        |
| 31       | 5.352E6 | 5.308E6 | 1.2        |
| 32       | 4.466E6 | 4.402E6 | Δ          |
| 33       | 6.022E6 | 5.902E6 | GFP        |
| Post Bkg | 264000  | 196000  |            |

1/20/09

NOTES

Yesterday I transferred all of the samples to polystyrene 5ml FACS tubes and sourecuted — 242 tubes, prep ~ 3.5h.

↳ Unfortunately the LSR II was not keeping pressure properly. There were times when I could distinguish the dark cells & the dTomato cells, but then the two distributions would merge back into one. The GFP however looked great: glaringly bright in the postive control and little autofluorescence in the WT. We are going to try running the samples again tomorrow on the LSR II and possibly on the sorter.

It seems like I will need to redo the expt. using GFP as a ~~con~~ Ref. I am toying w/ the idea of switching to minimal media — perhaps tonight I should start a pilot expt. to figure out what dilutions I will need to do it using minimal media.

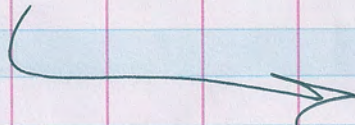



1/20/08

NOTES

Pros & Cons of YP vs. Minimal media:

- I have been thus for long all fitness assays in YP and I have a reasonable expectation for dilutions, timing, and cell densities
- YP is well buffered and is less likely to be conditioned  
↳ I could always buffer minimal media
- Using minimal strongly constrains the carbon source, whereas gal mutants can grow (v. slightly) in YP.



1/26/09

ANALYSIS OF COULTER COUNTS

GENERATIONS PER 12h. INTERVAL

CELL # VS. TIME

→ this is for each 10 ml culture tube - cells/ml is order of mag. less.

YPD

|       | 1    | 2    | 3    | 4    | 5    |
|-------|------|------|------|------|------|
| WT    | 6.55 | 6.48 | 6.45 | 6.30 | 6.34 |
| cis.1 | 6.59 | 6.44 | 6.42 | 6.35 | 6.30 |
| cis.2 | 6.61 | 6.46 | 6.39 | 6.31 | 6.31 |
| 7.1   | 6.60 | 6.49 | 6.42 | 6.33 | 6.30 |
| 7.2   | 6.61 | 6.50 | 6.39 | 6.36 | 6.23 |
| 10.1  | 6.39 | 6.52 | 6.38 | 6.33 | 5.97 |
| 10.2  | 6.56 | 6.49 | 6.35 | 6.37 | 6.27 |
| 1.1   | 6.62 | 6.55 | 6.29 | 6.34 | 6.29 |
| 1.2   | 6.59 | 6.44 | 6.38 | 6.33 | 6.28 |
| D     | 6.55 | 6.54 | 6.28 | 6.38 | 6.23 |
| GFP   | 6.59 | 6.50 | 6.41 | 6.32 | 6.26 |

Ave Gen. 6.41    Ideal Dil. 605.10    Dil. Volume 16.53

YPG

|       | 1    | 2    | 3    | 4    | 5    |
|-------|------|------|------|------|------|
| WT    | 5.04 | 4.80 | 4.59 | 4.03 | 4.25 |
| cis.1 | 4.97 | 4.70 | 4.45 | 4.37 | 4.18 |
| cis.2 | 5.02 | 4.67 | 4.28 | 4.29 | 4.23 |
| 7.1   | 5.03 | 4.74 | 4.33 | 4.36 | 4.10 |
| 7.2   | 4.95 | 4.86 | 4.32 | 4.32 | 4.30 |
| 10.1  | 5.01 | 4.74 | 4.31 | 4.24 | 4.21 |
| 10.2  | 5.01 | 4.67 | 4.28 | 4.28 | 4.25 |
| 1.1   | 4.99 | 4.69 | 4.30 | 4.29 | 4.18 |
| 1.2   | 5.04 | 4.62 | 4.36 | 4.29 | 4.25 |
| D     | 4.86 | 4.62 | 4.32 | 4.30 | 4.40 |
| GFP   | 5.00 | 4.74 | 4.32 | 4.25 | 4.34 |

Ave Gen. 4.52    Ideal Dil. 91.44    Dil. Volume 109.36

ALT

|       | YPD  | YPG  | YPD  | YPG  | YPD  |
|-------|------|------|------|------|------|
| WT    | 6.48 | 4.14 | 6.01 | 4.41 | 5.99 |
| cis.1 | 6.35 | 4.02 | 6.06 | 4.39 | 5.90 |
| cis.2 | 6.40 | 4.04 | 5.96 | 4.40 | 5.88 |
| 7.1   | 6.56 | 3.99 | 6.05 | 4.38 | 5.84 |
| 7.2   | 6.57 | 4.02 | 6.07 | 4.37 | 5.80 |
| 10.1  | 6.46 | 3.99 | 6.00 | 4.43 | 5.81 |
| 10.2  | 6.70 | 3.97 | 6.02 | 4.48 | 5.84 |
| 1.1   | 6.49 | 4.01 | 5.95 | 4.39 | 5.93 |
| 1.2   | 6.48 | 4.05 | 5.98 | 4.39 | 5.90 |
| D     | 6.49 | 3.87 | 5.98 | 4.43 | 5.89 |
| GFP   | 6.64 | 4.05 | 6.08 | 4.39 | 5.94 |

Ave Gen. 6.14    Ideal Dil. 462.42    Dil. Volume 21.63  
 YPD 4.21    YPG 67.31    148.56

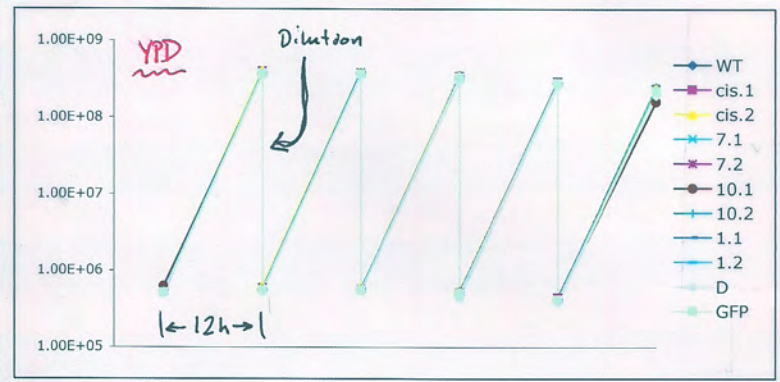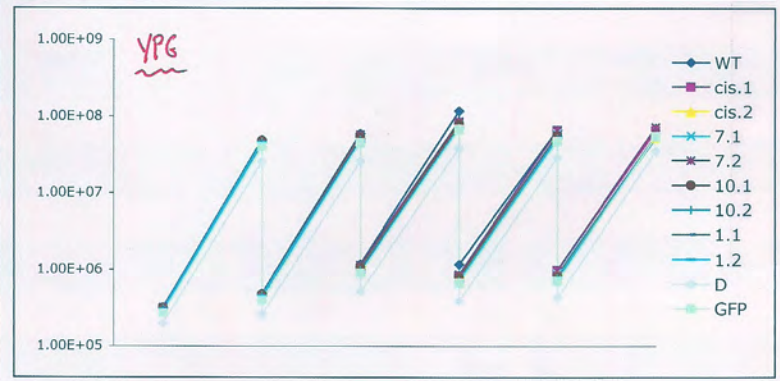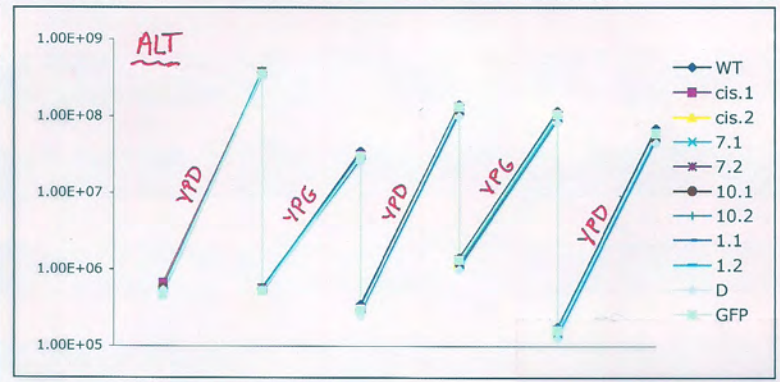

NOTES ON PROPAGATIONS

- I did a good job keeping the cultures in a reasonable range: no bottleneck was less than  $10^5$  and no culture reached  $10^8$  cells/ml.
- I was at the ideal dilution for YPD (each 12h period was more or less the same)
- I was hitting around the ideal dilution for YPG (110x) - I did 20x, 100x, 200x, 100x, & 150x
- I was off a bit w/ the ALT cultures - the dilutions and average culture densities were quite different



1/26/09 - FACS ANALYSIS

YPD

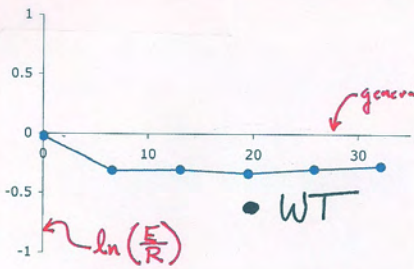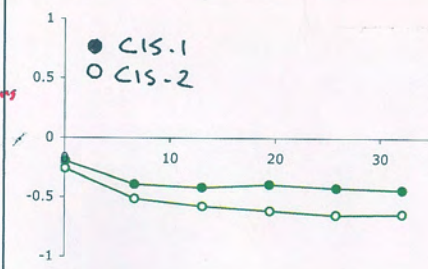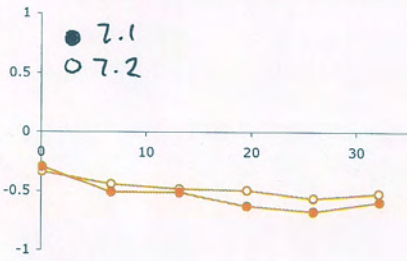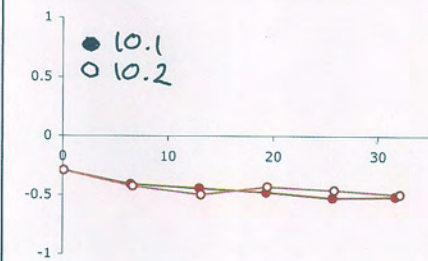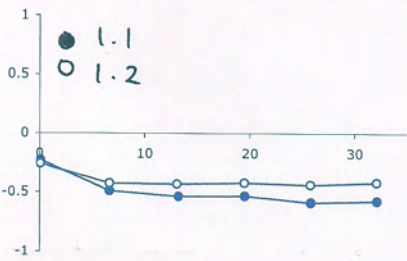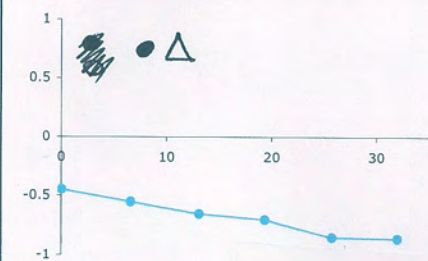

YPG

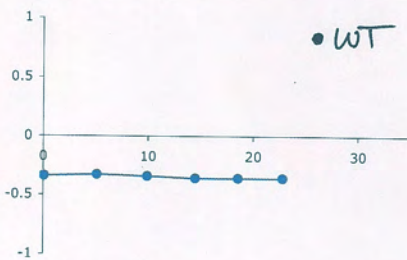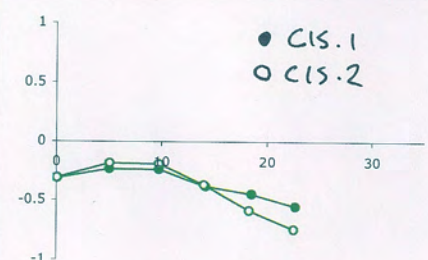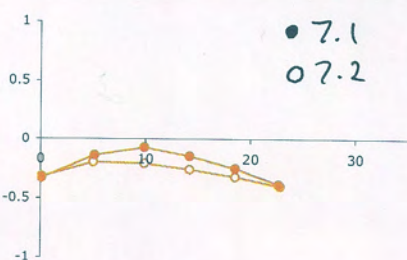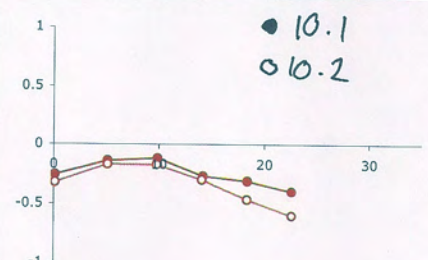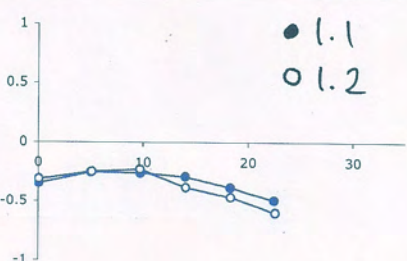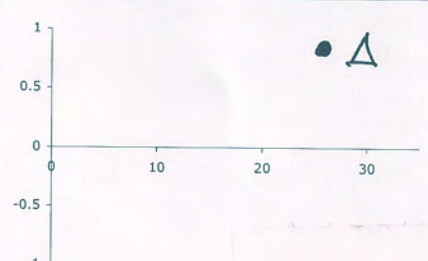

1/26/09  
ANALYSIS OF CON...  
GENERATIONS PER DIV...

NOTES ON PROPORTIONS  
I did a good job  
no difference in  
10<sup>8</sup> cells/ml  
I was at the  
I was at the



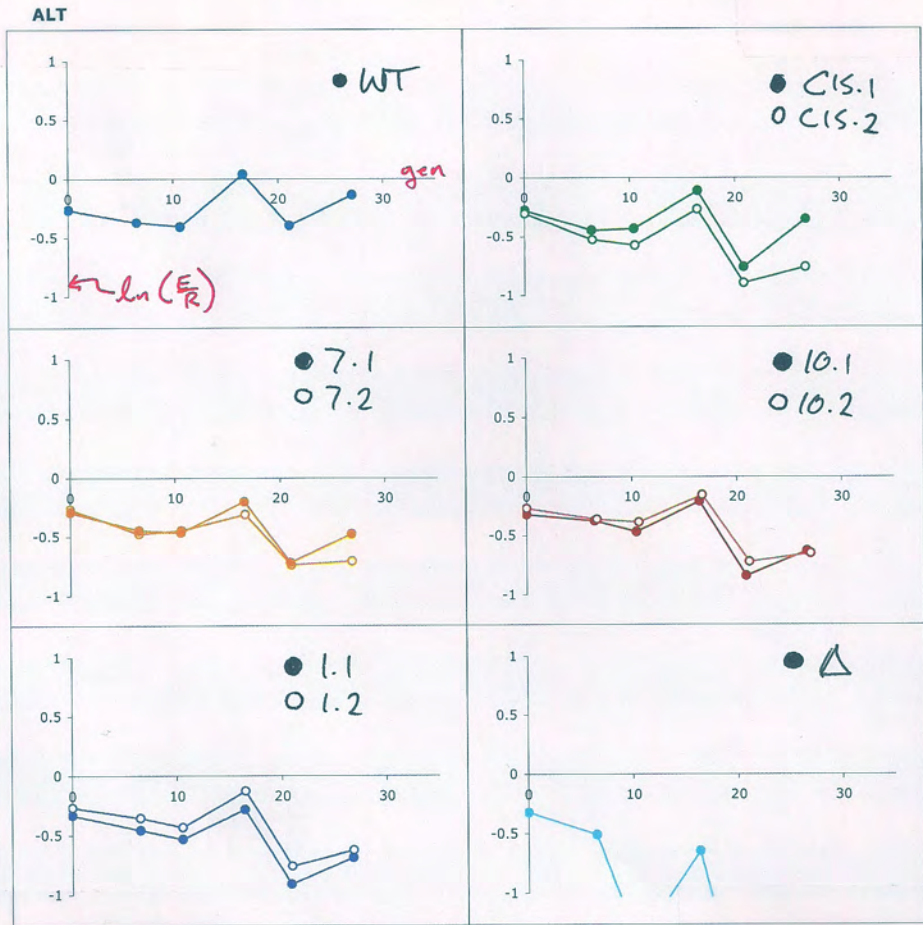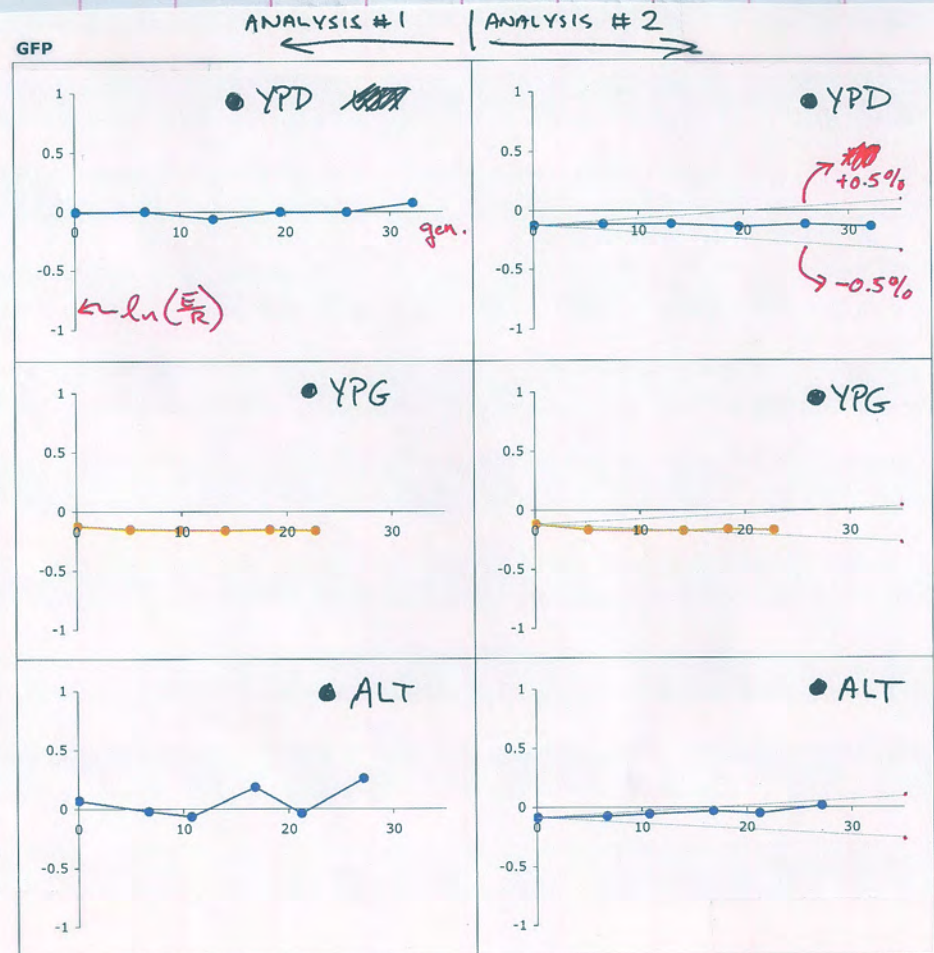

ANALYSIS #1 (left panels)  
 Here I distinguished the populations using only  $\Delta$ Tomato - from plot of FSC  $\Delta$  Tomato

ANALYSIS #2 (right panels)  
 Here I used both fluorophores to distinguish the populations - from a plot of GFP  $\Delta$  Tomato



1/26/09

## NOTES AND ANALYSIS OF FITNESS ASSAYS

I was not able to run the samples last Monday <sup>(1/19)</sup> as I had hoped due to a problem w/ the LSR II not keeping pressure. I stored my sonicated samples in the fridge until Wednesday and ran all of the samples at that time after the issue was fixed.

- The YPD cultures look fine (save for a "first 12h issue" like what I have seen before (see "Evolution 1" notebook).
- I am terribly confused by the YPG cultures. The WT and GFP are both fine, but the heterozygous strains all show a strange trajectory. If I saw the opposite concavity I could explain it by adaptation. Other possible (but not equally plausible explanations) include:
  - Drug marker artefacts
  - Freq. dependent selection
  - Adaptation of the reference
  - Loss of reporter in YPG (but why not in WT & GFP)

The Alternating cultures are also difficult to interpret. In fact even though I think I know what is going on I don't think I can interpret these data. I see a zig-zag appearance to the ALT cultures. Some of this may be due to the presence of the fluorophore in the Ref strain since the zig-zag pattern is not as prominent in the GFP v.  $\Delta$ Tomato competition. The primary reason for this pattern ~~is~~ the axes from differences in the FACS data for YPD  $\approx$  YPG cultures — this results in differences in the overlap btw the dark  $\approx$   $\Delta$ Tomato distributions when viewed in FSC v.  $\Delta$ Tomato. I was able to correct for this in the GFP v.  $\Delta$ Tomato competition by distinguishing the ~~data~~ populations using both fluorophores.



1/27/09

FITNESS IN YPD AND YPG

**Analysis of fitness in YPD and YPG**

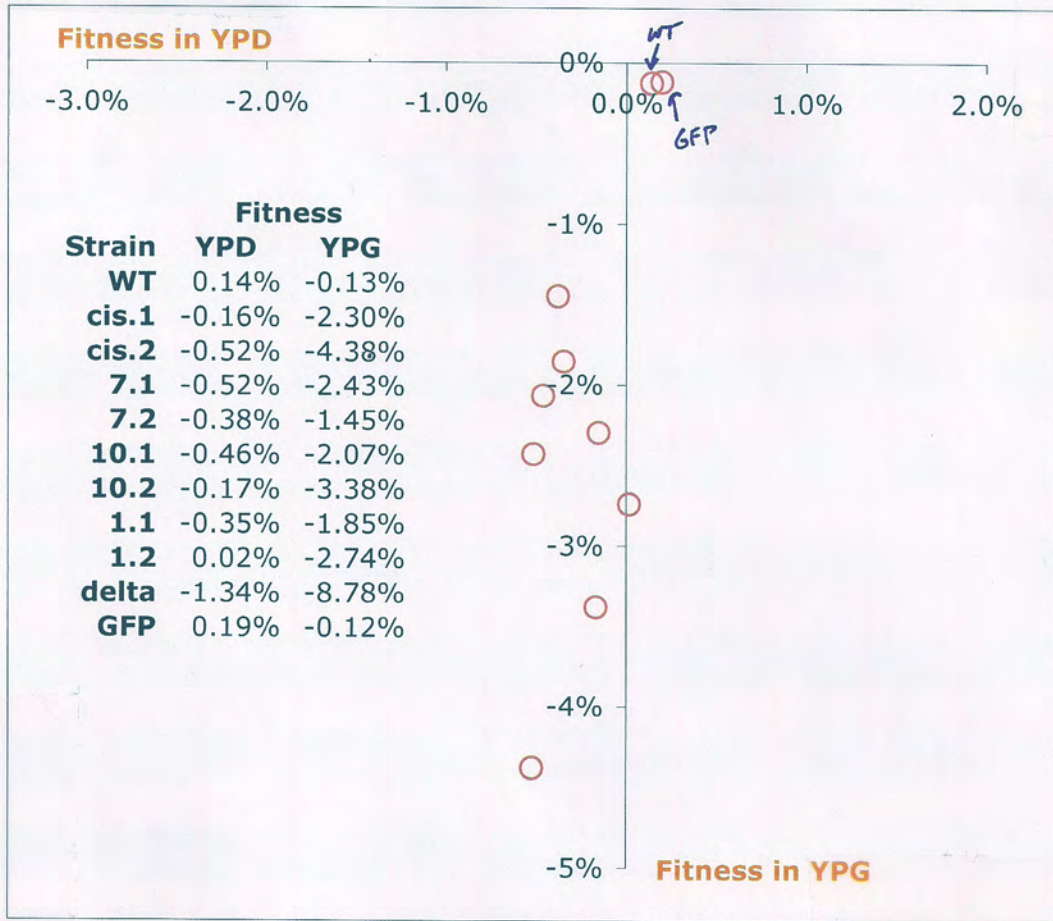

Fitness in YPD

I estimated the slopes from top panels on p. 60. and 61 (for GFP, left panels)

- I used all 6 points for  $\Delta$  and GFP.
- I used points 2-6 for all others

Fitness in YPG

- I used all 6 points for WT and GFP
- I used points 3-6 for the rest.



1/27/09

## SPORULATION AND DISSECTION OF GAL MUTANT STRAINS

- On 1/16 or 1/17 I took the original overnight cultures of the 12 strains used in this experiment, spun down 1 ml of saturated culture washed once w/ H<sub>2</sub>O and resuspended in 4 ml of 2% KAc.
- On Saturday 1/24 I dissected 3 tetrads from each of the 12 cultures — today I picked all colonies off the plates and moved them to 96 well plates (w/ 100  $\mu$ l H<sub>2</sub>O) and pin transferred to YPD, YPGal, YPD+Nat, YPD+Hyg, YPD+Kan, YNB-Glucose, and YNB-Galactose.

### Viable spores (#)

| STRAIN          | TETRAD 1 | TETRAD 2 | TETRAD 3 |
|-----------------|----------|----------|----------|
| WT              | 4        | 4        | 4        |
| cis-1           | 4        | 4        | 4        |
| cis-2           | 4        | 4        | 2        |
| 7-1             | 3        | 4        | 4        |
| 7-2             | 4        | 4        | 4        |
| 10-1            | 4        | 4        | 3        |
| 10-2            | 4        | 4        | 4        |
| 1-1             | 4        | 4        | 4        |
| 1-2             | 4        | 3        | 2        |
| $\Delta$        | 3*       | 3        | 4        |
| GFP             | 4        | 4        | 4        |
| $\Delta$ Tomato | 4        | 4        | 4        |

\* 1 of 3 has fitness defect

I looked at the GFP  $\Delta$  Tomato segregants under the microscope  
C  $\rightarrow$  for GFP, I see 2:2 segregation of strong  $\Delta$  weak fluorescence

STRONGLY FLUORESCENT

1A, 1D, 2B, 2C, 3B, 3C

WEAKLY FLUORESCENT

1B, 1C, 2A, 2D, 3A, 3D

All  $\Delta$ Tomato strains look the same



1/29/09

PHENOTYPIC ANALYSIS OF GAL MUTANT SEGREGANTS

|              | Hyg | G418 | Nat  | Gal |
|--------------|-----|------|------|-----|
| <b>WT</b>    |     |      |      |     |
| 1A           |     |      |      | +   |
| 1B           |     |      |      | +   |
| 1C           |     |      |      | +   |
| 1D           |     |      |      | +   |
| 2A           |     |      |      | +   |
| 2B           |     |      |      | +   |
| 2C           |     |      |      | +   |
| 2D           |     |      |      | +   |
| 3A           |     |      |      | +   |
| 3B           |     |      |      | +   |
| 3C           |     |      |      | +   |
| 3D           |     |      |      | +   |
| <b>cis.1</b> |     |      |      |     |
| 1A           |     |      |      | +   |
| 1B           | +   | +    | +    |     |
| 1C           |     |      |      | +   |
| 1D           | +   | +    | +    |     |
| 2A           |     |      |      | +   |
| 2B           |     |      |      | +   |
| 2C           | +   | +    | +    |     |
| 2D           | +   | +    | +    |     |
| 3A           | +   | +    | +    |     |
| 3B           | +   | +    | +    |     |
| 3C           | +   | +    | +    |     |
| 3D           |     |      |      | +   |
| <b>cis.2</b> |     |      |      |     |
| 1A           |     |      | invi |     |
| 1B           |     |      |      | +   |
| 1C           |     |      | invi |     |
| 1D           | +   | +    | +    |     |
| 2A           |     |      |      | +   |
| 2B           | +   | +    | +    |     |
| 2C           |     |      |      | +   |
| 2D           | +   | +    | +    |     |
| 3A           | +   | +    | +    |     |
| 3B           | +   | +    | +    |     |
| 3C           |     |      |      | +   |
| 3D           |     |      |      | +   |
| <b>7.1</b>   |     |      |      |     |
| 1A           |     | +    | +    |     |
| 1B           | +   |      |      | 0   |
| 1C           | +   |      |      | 0   |
| 1D           |     | +    | +    |     |
| 2A           | +   |      |      | 0   |
| 2B           |     | +    | +    |     |
| 2C           |     | +    | +    |     |
| 2D           | +   |      |      | 0   |
| 3A           |     | +    | +    |     |
| 3B           |     | invi |      |     |
| 3C           | +   | +    | +    |     |
| 3D           | +   |      |      | 0   |
| <b>7.2</b>   |     |      |      |     |
| 1A           | +   |      |      | 0   |
| 1B           |     | +    | +    |     |
| 1C           |     | +    | +    |     |
| 1D           | +   |      |      | 0   |
| 2A           |     | +    | +    |     |
| 2B           | +   |      |      | 0   |
| 2C           |     | +    | +    |     |
| 2D           | +   |      |      | 0   |
| 3A           |     | +    | +    |     |
| 3B           |     | +    | +    |     |
| 3C           | +   |      |      | 0   |
| 3D           | +   |      |      | 0   |
| <b>10.1</b>  |     |      |      |     |
| 1A           |     |      | invi |     |
| 1B           |     | +    |      | 0   |
| 1C           | +   |      | +    |     |
| 1D           | +   |      | +    |     |
| 2A           | +   |      | +    |     |
| 2B           |     | +    |      | 0   |
| 2C           | +   |      | +    |     |
| 2D           |     | +    |      | 0   |
| 3A           |     | +    |      | 0   |
| 3B           | +   |      | +    |     |
| 3C           | +   |      | +    |     |
| 3D           |     | +    |      | 0   |

|                | Hyg | G418 | Nat  | Gal |
|----------------|-----|------|------|-----|
| <b>10.2</b>    |     |      |      |     |
| 1A             | +   |      | +    |     |
| 1B             |     | +    |      | 0   |
| 1C             | +   |      | +    |     |
| 1D             |     | +    |      | 0   |
| 2A             | +   |      | +    |     |
| 2B             | +   |      | +    |     |
| 2C             |     | +    |      | 0   |
| 2D             |     | +    |      | 0   |
| 3A             | +   |      | +    |     |
| 3B             | +   | +    | +    | 0   |
| 3C             | +   | +    | +    | 0   |
| 3D             |     | +    |      | 0   |
| <b>1.1</b>     |     |      |      |     |
| 1A             | +   | +    |      | 0   |
| 1B             |     |      | +    |     |
| 1C             |     |      | +    |     |
| 1D             | +   | +    |      | 0   |
| 2A             | +   | +    |      | 0   |
| 2B             |     |      | +    |     |
| 2C             |     |      | +    |     |
| 2D             | +   | +    |      | 0   |
| 3A             |     |      | +    |     |
| 3B             | +   | +    | +    | 0   |
| 3C             | +   | +    | +    | 0   |
| 3D             |     |      | +    |     |
| <b>1.2</b>     |     |      |      |     |
| 1A             |     |      | invi |     |
| 1B             | +   | +    |      | 0   |
| 1C             |     |      | invi |     |
| 1D             | +   | +    |      | 0   |
| 2A             |     |      | +    |     |
| 2B             |     |      | +    |     |
| 2C             |     |      | +    | 0   |
| 2D             | +   |      | invi |     |
| 3A             | +   | +    |      | 0   |
| 3B             | +   | +    |      | 0   |
| 3C             |     |      | +    |     |
| 3D             |     |      | +    |     |
| <b>delete</b>  |     |      |      |     |
| 1A             | +   | +    | +    |     |
| 1B             | +   | +    | +    |     |
| 1C             | +   | +    | +    |     |
| 1D             | +   | +    | +    |     |
| 2A             |     |      | invi |     |
| 2B             | +   | +    | +    |     |
| 2C             | +   | +    | +    |     |
| 2D             | +   | +    | +    |     |
| 3A             |     |      | invi |     |
| 3B             | +   | +    | +    |     |
| 3C             | +   | +    | +    |     |
| 3D             | +   | +    | +    |     |
| <b>GFP</b>     |     |      |      |     |
| 1A             |     |      | +    | +   |
| 1B             |     |      | +    | +   |
| 1C             |     |      | +    | +   |
| 1D             |     |      | +    | +   |
| 2A             |     |      | +    | +   |
| 2B             |     |      | +    | +   |
| 2C             |     |      | +    | +   |
| 2D             |     |      | +    | +   |
| 3A             |     |      | +    | +   |
| 3B             |     |      | +    | +   |
| 3C             |     |      | +    | +   |
| 3D             |     |      | +    | +   |
| <b>dTomato</b> |     |      |      |     |
| 1A             |     |      | +    | +   |
| 1B             |     |      | +    | +   |
| 1C             |     |      | +    | +   |
| 1D             |     |      | +    | +   |
| 2A             |     |      | +    | +   |
| 2B             |     |      | +    | +   |
| 2C             |     |      | +    | +   |
| 2D             |     |      | +    | +   |
| 3A             |     |      | +    | +   |
| 3B             |     |      | +    | +   |
| 3C             |     |      | +    | +   |
| 3D             |     |      | +    | +   |



1/28/09

1/28/09

## Backcrossing gal-mutant strains to fluorescent strains

- In future rounds of fitness assays, I want to do two-colors — this is preferable for two reasons: the presence of a fluorophore in only one strain can cause artefacts and two colors allows better discrimination of the populations.
- On Monday (1/26) I streaked the following strains from freezer:

yGIL201  
202  
207  
213  
214  
220  
306  
308  
310  
312  
316  
319  
322  
323  
324  
325  
326  
327  
328  
366

these are all of the haploids used to construct the diploid gal mutants and fluorescent strains used in the fitness assays.

- Yesterday I patched the 6 spore segregants of yGIL375 that showed good GFP fluorescence onto YPD

→ I want to make a new GFP reference from these strains ~~that will be later today~~

- I want to cross all gal-mutant strains to  $\Delta$ Tomato strains (yGIL213 - MAT $\alpha$  and yGIL220 - MAT $\alpha$ )
- I want to cross the ~~the~~ triple delete strains to GFP (the patched ones from yesterday) so that I can use the "cis" diploids as an alternative reference strain.

I looked under the microscope at the bright patched GFP strains and yGIL207 and yGIL214. yGIL214 is quite dim — this is the reason for the 2:2 segregation of bright fluorescence.



1/28/09

CROSSES

1/29/09  
# of viable zygotes

| single colony of yGIL220      | x | single colony of yGIL306      |      |
|-------------------------------|---|-------------------------------|------|
| _____                         | x | _____ 310                     | 1    |
| _____                         | x | _____ 312                     | 3    |
| _____                         | x | _____ 322                     | 3    |
| _____                         | x | _____ 324                     | 3    |
| _____                         | x | _____ 326                     | 3    |
| _____                         | x | _____ 328                     | 1    |
| _____ 213                     | x | _____ 308                     | 0    |
| _____                         | x | _____ 316                     | 2    |
| _____                         | x | _____ 319                     | 3    |
| _____                         | x | _____ 323                     | 2    |
| _____                         | x | _____ 325                     | 3    |
| _____                         | x | _____ 327                     | 2    |
| _____                         | x | _____ 366                     | 2    |
| _____ 328                     | x | patch of yGIL378 segregant 1A | 1A   |
| _____                         | x | _____ 1D                      | 1D   |
| _____                         | x | _____ 2B                      | 2B   |
| _____                         | x | _____ 2C                      | 2C   |
| _____                         | x | _____ 3B                      | 3B   |
| _____                         | x | _____ 3C                      | 3C   |
| _____ 366                     | x | _____ 1A                      | 1A   |
| _____                         | x | _____ 1D                      | 1D   |
| _____                         | x | _____ 2B                      | 2B   |
| _____                         | x | _____ 2C                      | 2C   |
| _____                         | x | _____ 3B                      | 3B   |
| _____                         | x | _____ 3C                      | 3C   |
| patch of yGIL378 segregant 1A | x | _____ 1D                      | 1D   |
| _____                         | x | _____ 2B                      | 2B   |
| _____                         | x | _____ 2C                      | 2C   |
| _____                         | x | _____ 3B                      | 3B 3 |
| _____                         | x | _____ 3C                      | 3C   |

30° incubator @ 11:15 am



1/28/09

@ 2:00 I looked at the 6 yGIL328/GFP crosses in order to determine the mating types of the yGIL328 segregants:

1A -  $\alpha$

1D - a

2B -  $\alpha$

2C -  $\alpha$

3B - a

3C -  $\alpha$

Streak 1A & ~~1D~~<sup>3B</sup> to singles so I can freeze them down

- I will pick zygotes from the following:

yGIL328 x 1A

yGIL366 x ~~1D~~<sup>3B</sup>

1A x ~~1D~~<sup>3B</sup>

→ 1D did not mate w/ either

1A or yGIL366; ∴ use 3B instead

1/30/09

Freeze down:

yGIL328 segregant 1A → yGIL389

3B → yGIL390

yGIL389 x yGIL390 → yGIL391

Sporulate strains - spm 1ml culture

- wash once w/ 1ml H<sub>2</sub>O

- resuspend in 1ml 2% KAc

- Add to tube of 3ml 2% KAc

- RT roller drum

2/9/09

Today I dissected 5 tetrads from each of the 15 strains that have been sporulating for 10 days.

| Strain       | Segregation of Viability |        |     |        |     |     |     |
|--------------|--------------------------|--------|-----|--------|-----|-----|-----|
|              | 4:0                      | 4(f):0 | 3:1 | 3:1(f) | 2:2 | 1:3 | 0:4 |
| 378-1B x 366 | 5                        |        |     |        |     |     |     |
| 378-1A x 328 | 3                        |        | 1   |        |     |     | 1   |
| 220 x 306    | 4                        |        | 1   |        |     |     |     |
| 220 x 310    | 5                        |        |     |        |     |     |     |
| 220 x 312    | 3                        |        | 2   |        |     |     |     |
| 220 x 322    | 2                        |        | 2   | 1      |     |     |     |
| 220 x 324    | 4                        |        | 1   |        |     |     |     |
| 220 x 326    | 5                        |        |     |        |     |     |     |
| 220 x 328    | 1                        |        |     |        | 3   | 1   |     |
| 213 x 316    | 5                        |        |     |        |     |     |     |
| 213 x 319    | 5                        |        |     |        |     |     |     |
| 213 x 323    | 5                        |        |     |        |     |     |     |
| 213 x 325    | 5                        |        |     |        |     |     |     |
| 213 x 327    | 4                        | 1      |     |        |     |     |     |
| 213 x 366    | 3                        |        | 1   |        | 1   |     |     |

(f) - small colony

→ From this backcross I suspect that there may be a translocation in yGIL328 (triple Δ)

TOTAL SPORE VIABILITY OF CROSSES INVOLVING 328 (here 3 p. 64)

|         | 4:0 | 3:1 | 2:2 | 1:3 | 0:4 |
|---------|-----|-----|-----|-----|-----|
| yGIL328 | 7   | 3*  | 4   | 1   | 1   |
| yGIL322 | 3   | 4*  | 1   |     |     |

↳ each segregated a fitness defect in one spore

2/15/09



2/18/09

### SCHEMATIC OF STRAIN CONSTRUCTION

Here is a concise figure showing the derivation of strains used in the 1st round of fitness assays

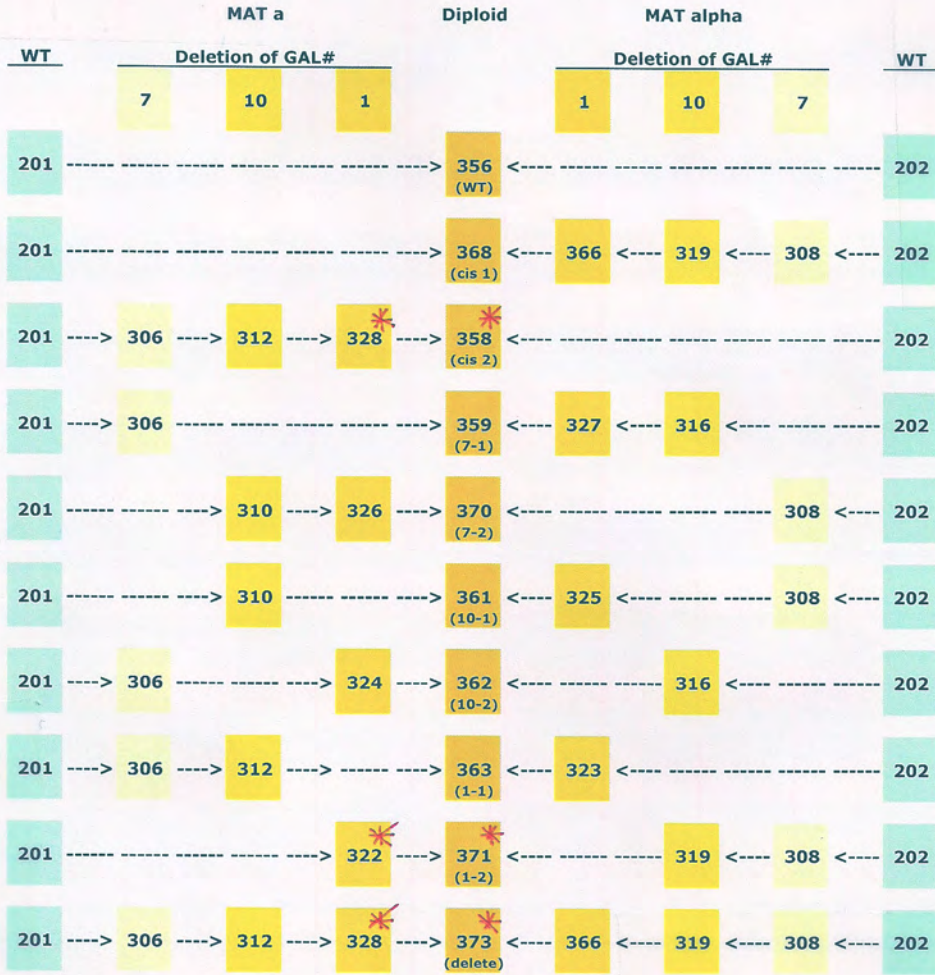

\* Possible translocation

2/18/09  
69



70 2/18/09

SUMMARY SHEETS FROM BACKCROSSES

| Strain | 378-1B x 366 | Nat. | G418 | YPG |
|--------|--------------|------|------|-----|
| 1A     | +            | +    | +    | +   |
| 1B     | +            | +    | +    | +   |
| 1C     | +            | +    | +    | +   |
| 1D     | +            | +    | +    | +   |
| 2A     | +            | +    | +    | +   |
| 2B     | +            | +    | +    | +   |
| 2C     | +            | +    | +    | +   |
| 2D     | +            | +    | +    | +   |
| 3A     | +            | +    | +    | +   |
| 3B     | +            | +    | +    | +   |
| 3C     | +            | +    | +    | +   |
| 3D     | +            | +    | +    | +   |
| 4A     | +            | +    | +    | +   |
| 4B     | +            | +    | +    | +   |
| 4C     | +            | +    | +    | +   |
| 4D     | +            | +    | +    | +   |
| 5A     | +            | +    | +    | +   |
| 5B     | +            | +    | +    | +   |
| 5C     | +            | +    | +    | +   |
| 5D     | +            | +    | +    | +   |

**A**  
1A, 10A, 7A

378-1A x ~~366~~ 328

| Strain | 378-1A x 328 | Nat. | G418 | YPG |
|--------|--------------|------|------|-----|
| 1A     | +            | +    | +    | +   |
| 1B     | +            | +    | +    | +   |
| 1C     | +            | +    | +    | +   |
| 1D     | +            | +    | +    | +   |
| 2A     | +            | +    | +    | +   |
| 2B     | +            | +    | +    | +   |
| 2C     | +            | +    | +    | +   |
| 2D     | +            | +    | +    | +   |
| 3A     | +            | +    | +    | +   |
| 3B     | +            | +    | +    | +   |
| 3C     | +            | +    | +    | +   |
| 3D     | +            | +    | +    | +   |
| 4A     | +            | +    | +    | +   |
| 4B     | +            | +    | +    | +   |
| 4C     | +            | +    | +    | +   |
| 4D     | +            | +    | +    | +   |

**B**  
1A, 10A, 7A

220 x 306

| Strain | 220 x 306 | Nat. | G418 | YPG |
|--------|-----------|------|------|-----|
| 1A     | +         | +    | +    | +   |
| 1B     | +         | +    | +    | +   |
| 1C     | +         | +    | +    | +   |
| 1D     | +         | +    | +    | +   |
| 2A     | +         | +    | +    | +   |
| 2B     | +         | +    | +    | +   |
| 2C     | +         | +    | +    | +   |
| 2D     | +         | +    | +    | +   |
| 3A     | +         | +    | +    | +   |
| 3B     | +         | +    | +    | +   |
| 3C     | +         | +    | +    | +   |
| 3D     | +         | +    | +    | +   |
| 4A     | +         | +    | +    | +   |
| 4B     | +         | +    | +    | +   |
| 4C     | +         | +    | +    | +   |
| 4D     | +         | +    | +    | +   |

**C**  
7A

220 x 310

| Strain | 220 x 310 | Nat. | G418 | YPG |
|--------|-----------|------|------|-----|
| 1A     | +         | +    | +    | +   |
| 1B     | +         | +    | +    | +   |
| 1C     | +         | +    | +    | +   |
| 1D     | +         | +    | +    | +   |
| 2A     | +         | +    | +    | +   |
| 2B     | +         | +    | +    | +   |
| 2C     | +         | +    | +    | +   |
| 2D     | +         | +    | +    | +   |
| 3A     | +         | +    | +    | +   |
| 3B     | +         | +    | +    | +   |
| 3C     | +         | +    | +    | +   |
| 3D     | +         | +    | +    | +   |
| 4A     | +         | +    | +    | +   |
| 4B     | +         | +    | +    | +   |
| 4C     | +         | +    | +    | +   |
| 4D     | +         | +    | +    | +   |

**D**  
10A

one of 2 will be green

one of 2 will be green

1 of 2

| Strain | 220 x 312 | Nat. | G418 | YPG |
|--------|-----------|------|------|-----|
| 1A     | +         | +    | +    | +   |
| 1B     | +         | +    | +    | +   |
| 1C     | +         | +    | +    | +   |
| 1D     | +         | +    | +    | +   |
| 2A     | +         | +    | +    | +   |
| 2B     | +         | +    | +    | +   |
| 2C     | +         | +    | +    | +   |
| 2D     | +         | +    | +    | +   |
| 3A     | +         | +    | +    | +   |
| 3B     | +         | +    | +    | +   |
| 3C     | +         | +    | +    | +   |
| 3D     | +         | +    | +    | +   |

**E**  
7A, 10A

220 x 322

| Strain | 220 x 322 | Nat. | G418 | YPG |
|--------|-----------|------|------|-----|
| 1A     | +         | +    | +    | +   |
| 1B     | +         | +    | +    | +   |
| 1C     | +         | +    | +    | +   |
| 1D     | +         | +    | +    | +   |
| 2A     | +         | +    | +    | +   |
| 2B     | +         | +    | +    | +   |
| 2C     | +         | +    | +    | +   |
| 2D     | +         | +    | +    | +   |
| 3A     | +         | +    | +    | +   |
| 3B     | +         | +    | +    | +   |
| 3C     | +         | +    | +    | +   |
| 3D     | +         | +    | +    | +   |

**F**  
1A

220 x 324

| Strain | 220 x 324 | Nat. | G418 | YPG |
|--------|-----------|------|------|-----|
| 1A     | +         | +    | +    | +   |
| 1B     | +         | +    | +    | +   |
| 1C     | +         | +    | +    | +   |
| 1D     | +         | +    | +    | +   |
| 2A     | +         | +    | +    | +   |
| 2B     | +         | +    | +    | +   |
| 2C     | +         | +    | +    | +   |
| 2D     | +         | +    | +    | +   |
| 3A     | +         | +    | +    | +   |
| 3B     | +         | +    | +    | +   |
| 3C     | +         | +    | +    | +   |
| 3D     | +         | +    | +    | +   |
| 4A     | +         | +    | +    | +   |
| 4B     | +         | +    | +    | +   |
| 4C     | +         | +    | +    | +   |
| 4D     | +         | +    | +    | +   |

**G**  
7A, 1A

220 x 326

| Strain | 220 x 326 | Nat. | G418 | YPG |
|--------|-----------|------|------|-----|
| 1A     | +         | +    | +    | +   |
| 1B     | +         | +    | +    | +   |
| 1C     | +         | +    | +    | +   |
| 1D     | +         | +    | +    | +   |
| 2A     | +         | +    | +    | +   |
| 2B     | +         | +    | +    | +   |
| 2C     | +         | +    | +    | +   |
| 2D     | +         | +    | +    | +   |
| 3A     | +         | +    | +    | +   |
| 3B     | +         | +    | +    | +   |
| 3C     | +         | +    | +    | +   |
| 3D     | +         | +    | +    | +   |
| 4A     | +         | +    | +    | +   |
| 4B     | +         | +    | +    | +   |
| 4C     | +         | +    | +    | +   |
| 4D     | +         | +    | +    | +   |

**H**  
10A, 1A

220 x 328

| Strain | 220 x 328 | Nat. | G418 | YPG |
|--------|-----------|------|------|-----|
| 1A     | +         | +    | +    | +   |
| 1B     | +         | +    | +    | +   |
| 1C     | +         | +    | +    | +   |
| 1D     | +         | +    | +    | +   |
| 2A     | +         | +    | +    | +   |
| 2B     | +         | +    | +    | +   |
| 2C     | +         | +    | +    | +   |
| 2D     | +         | +    | +    | +   |
| 3A     | +         | +    | +    | +   |
| 3B     | +         | +    | +    | +   |
| 3C     | +         | +    | +    | +   |
| 3D     | +         | +    | +    | +   |
| 4A     | +         | +    | +    | +   |
| 4B     | +         | +    | +    | +   |
| 4C     | +         | +    | +    | +   |
| 4D     | +         | +    | +    | +   |

**I**  
1A, 10A, 7A

5/18/04



213 x 325

M

7D 1A

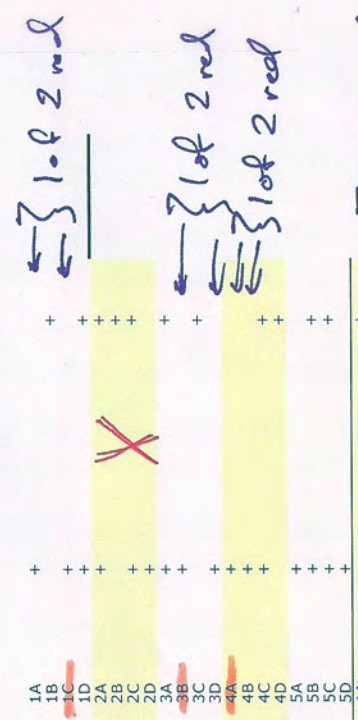

213 x 327

N

10D 1A

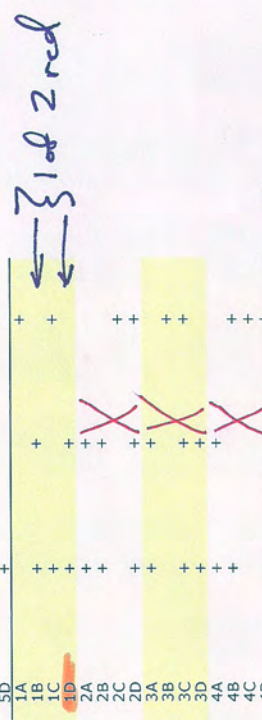

213 x 366

O

7D 10A 1A

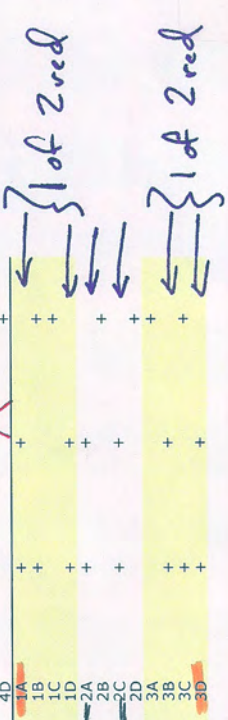

213 x 316

J

10D

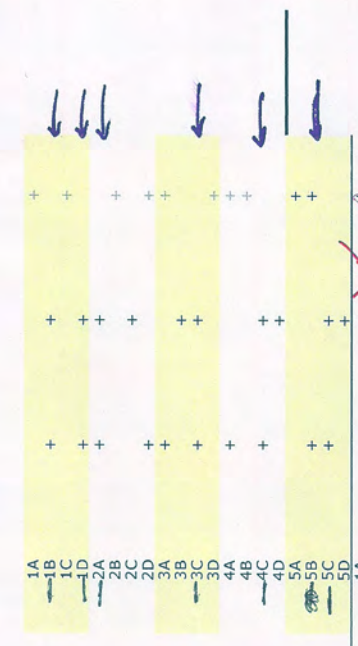

213 x 319

K

7D 10D

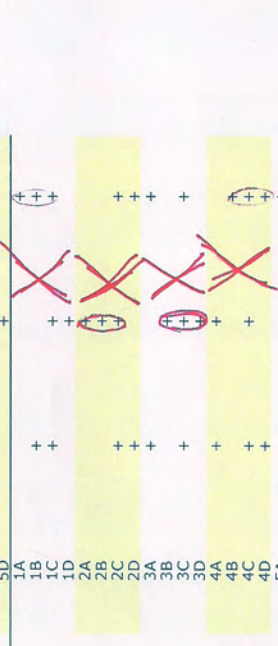

213 x 323

L

1A

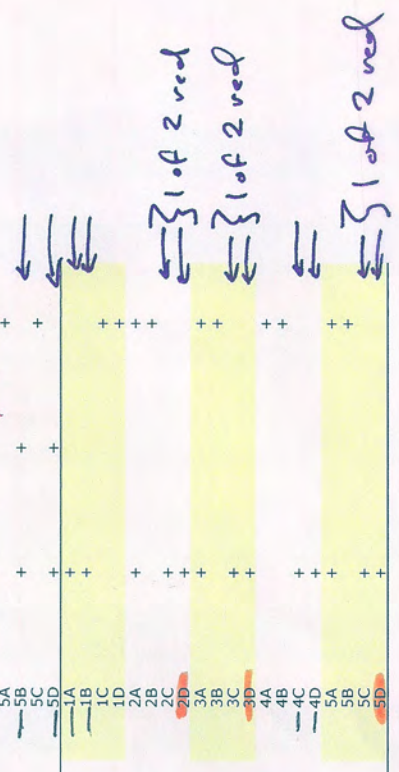



2/18/09

## DISCUSSION OF BACKCROSSES

- I picked all 236 viable ~~spores~~ segregants from the 59 4-spore tetrads (p. 68). I ~~put~~ picked each segregant and put into a well of a 96-well plate containing 100  $\mu$ l YPD.
- Segregants were pin transferred to YPD, YPD+G418, YPD+Nat, YPD+Hyg, & ~~YPD~~ YPGal.  $\rightarrow$  Phenotypes are on pages 70 & 71.
  - The Hyg plates did not work (I added too little volume and did not give the drug long enough to diffuse)
  - Some of the pin transfers did not work well & some of the gal plates are hard to discern (grey type).
  - I put an X through 4-spore viables, which did not segregate 2:2 G418<sup>R</sup> or Nat<sup>R</sup> (~~unless~~ unless Gal1 $\Delta$ ::Nat is in this strain)
- For strains w/ gal1 $\Delta$ ::Nat and GFP/atom::Nat where I could not ~~not~~ determine by segregation, I tested under the scope to find which gal<sup>-</sup> segregant had the fluorescent protein.  
 $\hookrightarrow$  Highlighted in orange is the fluorescent segregant.

~~From the 236 segregants~~

- From the 236 segregants I was left w/ 47 potentially correct strains. I mating type tested each of these strains by crossing to yGIL389(MATa) & yGIL390(MATa)  
 $\hookrightarrow$  3 strains were ambiguous:
    - H1A & H2D did not mate
    - LSD mated well w/ 389, but I could see a few zygotes in the other cross as well
  - I am left w/ 44 correct strains, of which I plan to freeze down 23
- NOTE:: I suspect that strains yGIL393~~113~~ and yGIL394 contain a translocation.



2/18/09

GENOTYPES FOR THE 44 CORRECT BACKCROSSED STRAINS

| GAL genotype | Fluorophore | MAT   | Spore | Strain # |
|--------------|-------------|-------|-------|----------|
| 1A 10A 7A    | GFP         | a     | A2C   | yGIL392  |
| 1A 10A 7A    | GFP         | a     | A5B   |          |
| 1A 10A 7A    | GFP         | a     | B1C   | yGIL393* |
| 1A 10A 7A    | GFP         | a     | B2D   |          |
| 1A 10A 7A    | GFP         | alpha | B1B   | yGIL394* |
| 1A           | dTomato     | a     | L1B   | yGIL395  |
| 1A           | dTomato     | a     | L2D   |          |
| 1A           | dTomato     | a     | L3D   |          |
| 1A           | dTomato     | a     | L4D   |          |
| 1A           | dTomato     | alpha | L1A   | yGIL396  |
| 1A           | dTomato     | alpha | L4C   |          |
| 10A          | dTomato     | a     | D2B   | yGIL397  |
| 10A          | dTomato     | a     | J4C   | yGIL398  |
| 10A          | dTomato     | alpha | D1D   | yGIL399  |
| 10A          | dTomato     | alpha | D3A   |          |
| 10A          | dTomato     | alpha | J1B   | yGIL400  |
| 10A          | dTomato     | alpha | J1D   |          |
| 10A          | dTomato     | alpha | J2A   |          |
| 10A          | dTomato     | alpha | J3C   |          |
| 10A          | dTomato     | alpha | J5C   |          |
| 7A           | dTomato     | a     | C1D   | yGIL401  |
| 7A           | dTomato     | a     | C3D   |          |
| 7A           | dTomato     | alpha | C1A   | yGIL402  |
| 1A 10A       | dTomato     | a     | H2A   |          |
| 1A 10A       | dTomato     | a     | H3B   | yGIL403  |
| 1A 10A       | dTomato     | a     | H3C   |          |
| 1A 10A       | dTomato     | alpha | N1D   | yGIL404  |
| 1A 7A        | dTomato     | a     | G2C   | yGIL405  |
| 1A 7A        | dTomato     | a     | G3D   |          |
| 1A 7A        | dTomato     | a     | M1C   | yGIL406  |
| 1A 7A        | dTomato     | a     | M4A   |          |
| 1A 7A        | dTomato     | alpha | G1C   | yGIL407  |
| 1A 7A        | dTomato     | alpha | G4C   |          |
| 1A 7A        | dTomato     | alpha | G4D   |          |
| 1A 7A        | dTomato     | alpha | M3B   | yGIL408  |
| 10A 7A       | dTomato     | a     | E1A   | yGIL409  |
| 10A 7A       | dTomato     | a     | K5D   | yGIL410  |
| 10A 7A       | dTomato     | alpha | E2D   | yGIL411  |
| 10A 7A       | dTomato     | alpha | E3A   |          |
| 10A 7A       | dTomato     | alpha | K5B   | yGIL412  |
| 1A 10A 7A    | dTomato     | a     | O2A   | yGIL413  |
| 1A 10A 7A    | dTomato     | alpha | O1A   |          |
| 1A 10A 7A    | dTomato     | alpha | O2C   | yGIL414  |
| 1A 10A 7A    | dTomato     | alpha | O3D   |          |

\* may contain translocation

set up the following crosses:

| Genotype | Color | Crosses |                  |
|----------|-------|---------|------------------|
|          |       | MATa    | MAT <del>a</del> |
| WT       | green | yGIL390 | yGIL389          |
| cis-1    | green | yGIL390 | B1B              |
| REF      | cis-2 | A2C     | yGIL389          |
| WT       | red   | yGIL213 | yGIL220          |
| cis-1    | red   | yGIL213 | O2C              |
| cis-2    | red   | O2A     | yGIL220          |
| 7-1      | red   | C1D     | N1D              |
| 7-2      | red   | H3B     | C1A              |
| 10-1     | red   | D2B     | G1C              |
| 10-2     | red   | M1C     | J1B              |
| 1-1      | red   | L1B     | K5B              |
| 1-2      | red   | E1A     | L1A              |
| Δ        | red   | O2A     | O2C              |

pick 5 zygotes for each cross

2/23/09

frozen down (as listed)

yGIL415

yGIL427

2/20/09

3-5 zygotes grew for each strain. On Sunday I will start cultures for freeze-down & fitness assays. For now, put plates in 4° fridge.



2/21/09

START OF SECOND ROUND OF GAL-MUTANT FITNESS ASSAYS

- Yesterday I prepared media for the fitness assay as before (p. 45). From the 1.5L I made 140 # tubes of each YPD & YPG.

→ I autoclaved the remaining media in 100 mL bottles (30-50 mL).

2/22/09

- Inoculate 5 mL of YPD & YPG w/ a single colony off of the pulled zygote plates from fridge (p. 73)

→ I took half of the colony and inoculated YPG, then took the other half to inoculate YPD.

→ 30° rollerdrum @ 5:15 pm

- I also inoculated 3 mL of YPD w/ a single colony from the restreaked haploids to be frozen down (yGIL392-414, p. 73)

2/23/09

- 2:00 pm: - Dilute o/N YPD cultures 1:333 (30  $\mu$  into 10 mL)
- Dilute o/N YPG cultures 1:222 (45  $\mu$  into 10 mL)

→ I kept the original  $\Delta$  YPG strain on the rollerdrum - I will probably use this one in the expt.

NOTE: In this run of the fitness assay, I am doing all of the dilutions (starting w/ the one above) # in the 30° room.



2/23/09

Test Counts (8:15 pm)

|           |                     |                     |
|-----------|---------------------|---------------------|
| Bkg       | 436000              | 582000              |
| WT-YPD    | ————                | spilled             |
| CIS-1-YPD | 1.081E <sup>7</sup> | 1.07E <sup>7</sup>  |
| REF-YPD   | 1.22E <sup>7</sup>  | 1.185E <sup>7</sup> |
| WT-YPG    | 1.352E <sup>7</sup> | 1.384E <sup>7</sup> |
| CIS-1-YPG | 1.641E <sup>7</sup> | 2.015E <sup>7</sup> |
| REF-YPG   | 1.283E <sup>7</sup> | 1.269E <sup>7</sup> |
| Post Bkg  | 536000              | 476000              |

They are a little ahead of what I expected — presumably because I did the dilutions in the warm room w/ prewarmed media — compare to p. 48 — plan for ~9:30 dilutions

I will mix all strains 250  $\mu$ l Exp. :: 250  $\mu$ l Ref.

Dilutions YPD: 17  $\mu$ l into YPD  
 ALT: 17  $\mu$ l into YPD } dilutions @ 9:15 pm  
 YPG: 109  $\mu$ l into YPG

Coulter counts (10 pm)

|           |             |                     |                     |                     |       |       |
|-----------|-------------|---------------------|---------------------|---------------------|-------|-------|
|           | Bkg         | 274000              | 274000              | 118000              | 54000 | 56000 |
| YPD       | WT 1        | 1.716E <sup>7</sup> | 2.015E <sup>7</sup> | 1.685E <sup>7</sup> |       |       |
|           | CIS-1 2     | 1.853E <sup>7</sup> | 1.869E <sup>7</sup> |                     |       |       |
|           | CIS-2 3     | 2.04E <sup>7</sup>  | 2.065E <sup>7</sup> |                     |       |       |
|           | 7-1 4       | 1.831E <sup>7</sup> | 1.717E <sup>7</sup> |                     |       |       |
|           | 7-2 5       | 1.817E <sup>7</sup> | 1.859E <sup>7</sup> |                     |       |       |
|           | 10-1 6      | 1.841E <sup>7</sup> | 1.882E <sup>7</sup> |                     |       |       |
|           | 10-2 7      | 1.848E <sup>7</sup> | 1.8E <sup>7</sup>   |                     |       |       |
|           | 1-1 8       | 1.719E <sup>7</sup> | 1.711E <sup>7</sup> |                     |       |       |
|           | 1-2 9       | 1.861E <sup>7</sup> | 1.796E <sup>7</sup> |                     |       |       |
|           | $\Delta$ 10 | 2.083E <sup>7</sup> | 2.032E <sup>7</sup> |                     |       |       |
| ALT (YPD) | WT 11       | 1.984E <sup>7</sup> | 1.916E <sup>7</sup> |                     |       |       |
|           | CIS-1 12    | 1.846E <sup>7</sup> | 1.792E <sup>7</sup> |                     |       |       |
|           | CIS-2 13    | 2.147E <sup>7</sup> | 2.123E <sup>7</sup> |                     |       |       |
|           | 7-1 14      | 1.991E <sup>7</sup> | 1.926E <sup>7</sup> |                     |       |       |

← CONTINUED ON p76 →



Counter Counts Continued

|              |          |                     |                     |                     |
|--------------|----------|---------------------|---------------------|---------------------|
| ALT<br>(YPD) | 7.2 15   | 1.903E <sup>7</sup> | 2.316E <sup>7</sup> | 1.84E <sup>7</sup>  |
|              | 10.1 16  | 1.819E <sup>7</sup> | 1.784E <sup>7</sup> |                     |
|              | 10.2 17  | 1.984E <sup>7</sup> | 1.997E <sup>7</sup> |                     |
|              | 1.1 18   | 1.743E <sup>7</sup> | 1.742E <sup>7</sup> |                     |
|              | 1.2 19   | 1.791E <sup>7</sup> | 1.792E <sup>7</sup> |                     |
|              | Δ 20     | 1.897E <sup>7</sup> | 1.864E <sup>7</sup> |                     |
| YPG          | WT 21    | 1.68E <sup>7</sup>  | 1.641E <sup>7</sup> |                     |
|              | CIS-1 22 | 1.6E <sup>7</sup>   | 1.63E <sup>7</sup>  |                     |
|              | CIS-2 23 | 1.805E <sup>7</sup> | 1.772E <sup>7</sup> |                     |
|              | 7.1 24   | 1.702E <sup>7</sup> | 1.678E <sup>7</sup> |                     |
|              | 7.2 25   | 1.678E <sup>7</sup> | 1.717E <sup>7</sup> |                     |
|              | 10.1 26  | 1.691E <sup>7</sup> | 1.678E <sup>7</sup> |                     |
|              | 10.2 27  | 1.675E <sup>7</sup> | 1.684E <sup>7</sup> |                     |
|              | 1.1 28   | 1.629E <sup>7</sup> | 2.016E <sup>7</sup> | 1.647E <sup>7</sup> |
|              | 1.2 29   | 1.568E <sup>7</sup> | 1.572E <sup>7</sup> |                     |
|              | Δ 30     | 1.8E <sup>7</sup>   | 1.781E <sup>7</sup> |                     |

Post Bkg 568000 350000

~~For the~~ For the YPG culture of Δ I used the original o/p (which I left on the roller drum) instead of the 1:222 dilution that was, expectedly, dilute.

2/24/09

TEST COUNTS (8:45 am)

|           |                     |                     |
|-----------|---------------------|---------------------|
| Bkg       | 56000               | 102000              |
| WT-YPD    | 1.739E <sup>7</sup> | 1.783E <sup>7</sup> |
| CIS-YPD   | 1.66E <sup>7</sup>  | 1.617E <sup>7</sup> |
| WT-YPG    | 1.927E <sup>7</sup> | 1.949E <sup>7</sup> |
| CIS-1-YPG | 2.095E <sup>7</sup> | 2.097E <sup>7</sup> |
| Post Bkg  | 630000              | 430000              |

Dilutions YPD: 15 λ into YPD  
 ALT: 148 λ into YPG  
 YPG: 100 λ into YPG } Dilutions 9am

← CONTINUED ON PAGE



2/24/09

COULTER COUNTS (10 am)

|           | Bkg      | 74000               | 86000                                  |
|-----------|----------|---------------------|----------------------------------------|
| YPD       | WT 1     | 2.475E <sup>7</sup> | 2.482E <sup>7</sup>                    |
|           | CIS-1 2  | 2.709E <sup>7</sup> | 2.367E <sup>7</sup> 2.38E <sup>7</sup> |
|           | CIS-2 3  | 2.369E <sup>7</sup> | 2.28E <sup>7</sup>                     |
|           | 7-1 4    | 2.466E <sup>7</sup> | 2.453E <sup>7</sup>                    |
|           | 7-2 5    | 2.483E <sup>7</sup> | 2.466E <sup>7</sup>                    |
|           | 10-1 6   | 2.417E <sup>7</sup> | 2.376E <sup>7</sup>                    |
|           | 10-2 7   | 2.44E <sup>7</sup>  | 2.409E <sup>7</sup>                    |
|           | 1-1 8    | 2.509E <sup>7</sup> | 2.483E <sup>7</sup>                    |
|           | 1-2 9    | 2.511E <sup>7</sup> | 2.539E <sup>7</sup>                    |
|           | Δ 10     | 2.317E <sup>7</sup> | 2.277E <sup>7</sup>                    |
| ALT (YPD) | WT 11    | 2.544E <sup>7</sup> | 2.501E <sup>7</sup>                    |
|           | CIS-1 12 | 2.317E <sup>7</sup> | 2.337E <sup>7</sup>                    |
|           | CIS-2 13 | 2.393E <sup>7</sup> | 2.368E <sup>7</sup>                    |
|           | 7-1 14   | 2.392E <sup>7</sup> | 2.35E <sup>7</sup>                     |
|           | 7-2 15   | 2.454E <sup>7</sup> | 2.447E <sup>7</sup>                    |
|           | 10-1 16  | 2.447E <sup>7</sup> | 2.508E <sup>7</sup>                    |
|           | 10-2 17  | 2.434E <sup>7</sup> | 2.378E <sup>7</sup>                    |
|           | 1-1 18   | 2.31E <sup>7</sup>  | 2.324E <sup>7</sup>                    |
|           | 1-2 19   | 2.424E <sup>7</sup> | 2.403E <sup>7</sup>                    |
|           | Δ 20     | 2.441E <sup>7</sup> | 2.394E <sup>7</sup>                    |
| YPG       | WT 21    | 2.347E <sup>7</sup> | 2.309E <sup>7</sup>                    |
|           | CIS-1 22 | 2.357E <sup>7</sup> | 2.316E <sup>7</sup>                    |
|           | CIS-2 23 | 2.424E <sup>7</sup> | 2.438E <sup>7</sup>                    |
|           | 7-1 24   | 2.559E <sup>7</sup> | 2.535E <sup>7</sup>                    |
|           | 7-2 25   | 2.37E <sup>7</sup>  | 2.351E <sup>7</sup>                    |
|           | 10-1 26  | 2.748E <sup>7</sup> | 2.682E <sup>7</sup>                    |
|           | 10-2 27  | 2.414E <sup>7</sup> | 2.405E <sup>7</sup>                    |
|           | 1-1 28   | 2.403E <sup>7</sup> | 2.327E <sup>7</sup>                    |
|           | 1-2 29   | 2.282E <sup>7</sup> | 2.283E <sup>7</sup>                    |
|           | Δ 30     | 1.535E <sup>7</sup> | 1.5E <sup>7</sup>                      |
|           | Post Bkg | 564000              | 324000                                 |

2



2/24/09

NOTES:

- While I was preparing the samples for FACS (after dilution), I broke the tube for 10:1-YPG. I pipetted 500  $\mu$ l off of the benchtop for FACS and 10  $\mu$ l for counter counting — the counts for this sample look high, possibly from aspirating junk off of the bench. (p. 77).
- Cells seem to be growing a little faster this round — possibly because I am doing all of the dilutions in the 30° room. Other possibilities are less vol. in the media tubes or media quality — although it should be quite similar to last time.
- I am following the same order as last time (p. 51) except I am sampling for FACS before sampling for counter.
- Sporulation — Today I sporulated the original o/w cultures which have sat o/w again on my bench.
  - spin ~ 1.5 ml → ~~wash~~ aspirate; wash w/ 1 ml H<sub>2</sub>O
  - resuspended in 1 ml 2% KAc; add to 3 ml tube of 2% KAc roller drum @ RT
- Since the cells were a little dense when I did the test counts, I moved the dilution time up to 9 — when I looked at the clock for the 1<sup>st</sup> dilution it was in-between 9 & 9:15 so I rounded up — But now I will stick to 9:00 dilutions.



2/24/09

TEST COUNTS (8:30 pm)

|           |            |            |
|-----------|------------|------------|
| Bkg       | 144000     | 146000     |
| WT-YPD    | $1.735E^7$ | $1.751E^7$ |
| CIS-1-YPD | $1.613E^7$ | $1.597E^7$ |
| WT-ALT    | $1.912E^7$ | $1.902E^7$ |
| CIS-1-ALT | $1.602E^7$ | $1.604E^7$ |
| WT-YPG    | $2.032E^7$ | $2.008E^7$ |
| CIS-1-YPG | $2.12E^7$  | 2.184      |
| Post Bkg  | 818000     | 568000     |

DILUTIONS @ 9pm {  
 YPD: 15  $\lambda$  into YPD  
 ALT: 20  $\lambda$  into YPD  
 YPG: 90  $\lambda$  into YPG

Coulter Counts (9:45 pm)

|           | Bkg         | 32000      | 38000      |
|-----------|-------------|------------|------------|
| YPD       | WT 1        | $2.409E^7$ | $2.381E^7$ |
|           | CIS-1 2     | $2.227E^7$ | $2.156E^7$ |
|           | CIS-2 3     | $2.192E^7$ | $2.213E^7$ |
|           | 7-1 4       | $2.327E^7$ | $2.345E^7$ |
|           | 7-2 5       | $2.332E^7$ | $2.353E^7$ |
|           | 10-1 6      | $2.059E^7$ | $2.039E^7$ |
|           | 10-2 7      | $2.303E^7$ | $2.272E^7$ |
|           | 1-1 8       | $2.11E^7$  | $2.104E^7$ |
|           | 1-2 9       | $2.242E^7$ | $2.251E^7$ |
|           | $\Delta$ 10 | $2.01E^7$  | $1.932E^7$ |
| ALT (YPG) | WT 11       | $2.318E^7$ | $2.273E^7$ |
|           | CIS-1 12    | $1.856E^7$ | $1.861E^7$ |
|           | CIS-2 13    | $1.889E^7$ | $1.837E^7$ |
|           | 7-1 14      | $1.797E^7$ | $1.809E^7$ |
|           | 7-2 15      | $1.859E^7$ | $1.839E^7$ |
|           | 10-1 16     | $1.928E^7$ | $1.935E^7$ |
|           | 10-2 17     | $1.872E^7$ | $1.89E^7$  |
|           | 1-1 18      | $1.762E^7$ | $1.724E^7$ |
|           | 1-2 19      | $1.767E^7$ | $1.736E^7$ |
|           | $\Delta$ 20 | $1.391E^7$ | $1.38E^7$  |

3

4



Coulter Counts continued

|     |       |          |                     |                     |
|-----|-------|----------|---------------------|---------------------|
| YPG | WT    | 21       | 2.251E <sup>7</sup> | 2.212E <sup>7</sup> |
|     | CIS-1 | 22       | 2.378E <sup>7</sup> | 2.338E <sup>7</sup> |
|     | CIS-2 | 23       | 2.435E <sup>7</sup> | 2.435E <sup>7</sup> |
|     | 7-1   | 24       | 2.463E <sup>7</sup> | 2.499E <sup>7</sup> |
|     | 7-2   | 25       | 2.297E <sup>7</sup> | 2.361E <sup>7</sup> |
|     | 10-1  | 26       | 2.328E <sup>7</sup> | 2.305E <sup>7</sup> |
|     | 10-2  | 27       | 2.45E <sup>7</sup>  | 2.392E <sup>7</sup> |
|     | 1-1   | 28       | 2.27E <sup>7</sup>  | 2.244E <sup>7</sup> |
|     | 1-2   | 29       | 2.319E <sup>7</sup> | 2.31E <sup>7</sup>  |
|     | Δ     | 30       | 1.303E <sup>7</sup> | 1.308E <sup>7</sup> |
|     |       | Post Bkg | 342000              | 312000              |

2/25/09

TEST COUNTS (8:30 am)

|             |                     |                     |
|-------------|---------------------|---------------------|
| Bkg         | 46000               | 44000               |
| WT - YPD    | 1.69E <sup>7</sup>  | 1.668E <sup>7</sup> |
| CIS-1 - YPD | 1.383E <sup>7</sup> | 1.465E <sup>7</sup> |
| WT - ALT    | 1.244E <sup>7</sup> | 1.212E <sup>7</sup> |
| CIS-1 - ALT | 9.09E <sup>6</sup>  | 8.972E <sup>6</sup> |
| WT - YPG    | 1.577E <sup>7</sup> | 1.562E <sup>7</sup> |
| CIS-1 - YPG | 1.82E <sup>7</sup>  | 1.8E <sup>7</sup>   |
| Post Bkg    | 672000              | 360000              |

DILUTIONS @ 9am

- YPD: 151 into YPD
- ALT: 1501 into YPG
- YPG: 1001 into YPG

Coulter Counts (~10am)

|     |       |    |                     |                     |
|-----|-------|----|---------------------|---------------------|
| YPD | WT    | 1  | 2.292E <sup>7</sup> | 2.315E <sup>7</sup> |
|     | CIS-1 | 2  | 1.952E <sup>7</sup> | 1.904E <sup>7</sup> |
|     | CIS-2 | 3  | 1.911E <sup>7</sup> | 1.905E <sup>7</sup> |
|     | 7-1   | 4  | 2.017E <sup>7</sup> | 2.019E <sup>7</sup> |
|     | 7-2   | 5  | 2.113E <sup>7</sup> | 2.129E <sup>7</sup> |
|     | 10-1  | 6  | 2.111E <sup>7</sup> | 2.076E <sup>7</sup> |
|     | 10-2  | 7  | 2.128E <sup>7</sup> | 2.111E <sup>7</sup> |
|     | 1-1   | 8  | 2.019E <sup>7</sup> | 1.986E <sup>7</sup> |
|     | 1-2   | 9  | 1.931E <sup>7</sup> | 1.888E <sup>7</sup> |
|     | Δ     | 10 | 1.801E <sup>7</sup> | 1.724E <sup>7</sup> |

4



2/25/09

Coulter Counts Continued

|              |       |    |                     |                     |                    |
|--------------|-------|----|---------------------|---------------------|--------------------|
| ALT<br>(YPD) | WT    | 11 | 1.766E <sup>7</sup> | 1.775E <sup>7</sup> |                    |
|              | C15-1 | 12 | 1.249E <sup>7</sup> | 1.258E <sup>7</sup> |                    |
|              | C15-2 | 13 | 1.297E <sup>7</sup> | 1.292E <sup>7</sup> |                    |
|              | 7-1   | 14 | 1.197E <sup>7</sup> | 1.168E <sup>7</sup> |                    |
|              | 7-2   | 15 | 1.264E <sup>7</sup> | 1.237E <sup>7</sup> |                    |
|              | 10-1  | 16 | 1.285E <sup>7</sup> | 1.296E <sup>7</sup> |                    |
|              | 10-2  | 17 | 1.321E <sup>7</sup> | 1.336E <sup>7</sup> |                    |
|              | 1-1   | 18 | 1.262E <sup>7</sup> | 1.234E <sup>7</sup> |                    |
|              | 1-2   | 19 | 1.358E <sup>7</sup> | 1.359E <sup>7</sup> |                    |
|              | Δ     | 20 | 8.712E <sup>6</sup> | 8.72E <sup>6</sup>  |                    |
| YPG          | WT    | 21 | 1.92E <sup>7</sup>  | 1.958E <sup>7</sup> |                    |
|              | C15-1 | 22 | 2.118E <sup>7</sup> | 2.138E <sup>7</sup> |                    |
|              | C15-2 | 23 | 1.946E <sup>7</sup> | 1.944E <sup>7</sup> |                    |
|              | 7-1   | 24 | 2.151E <sup>7</sup> | 2.119E <sup>7</sup> |                    |
|              | 7-2   | 25 | 1.98E <sup>7</sup>  | 1.966E <sup>7</sup> |                    |
|              | 10-1  | 26 | 1.849E <sup>7</sup> | 1.859E <sup>7</sup> |                    |
|              | 10-2  | 27 | 2.019E <sup>7</sup> | 2.006E <sup>7</sup> |                    |
|              | 1-1   | 28 | 1.9E <sup>7</sup>   | 1.866E <sup>7</sup> | 1.85E <sup>7</sup> |
|              | 1-2   | 29 | 1.877E <sup>7</sup> | 1.838E <sup>7</sup> |                    |
|              | Δ     | 30 | 8.912E <sup>6</sup> | 9.042E <sup>6</sup> |                    |
| Post Bkg     |       |    | 354000              | 298000              |                    |

TEST COUNTS (8:30 PM)

|             |                     |                     |
|-------------|---------------------|---------------------|
| Bkg         | 418000              | 1.018E <sup>6</sup> |
| WT - YPD    | 1.319E <sup>7</sup> | 1.314E <sup>7</sup> |
| C15-1 - YPD | 1.128E <sup>7</sup> | 1.052E <sup>7</sup> |
| WT - ALT    | 1.713E <sup>7</sup> | 1.724E <sup>7</sup> |
| C15-1 - ALT | 1.368E <sup>7</sup> | 1.345E <sup>7</sup> |
| WT - YPG    | 1.27E <sup>7</sup>  | 1.27E <sup>7</sup>  |
| C15-1 - YPG | 1.598E <sup>7</sup> | 1.602E <sup>7</sup> |
| Post Bkg    | 688000              | 248000              |

DILUTIONS  
@ 9pm

{ YPD: 20λ into YPD  
 { ALT: 20λ into YPD  
 { YPG: 100λ into YPG



# 2/25/09

2/25/09

COULTER COUNTS (9:45 PM)

|           | Bkg      | 40000               | 66000               |
|-----------|----------|---------------------|---------------------|
| YPD       | WT 1     | 1.691E <sup>7</sup> | 1.689E <sup>7</sup> |
|           | CIS-1 2  | 1.426E <sup>7</sup> | 1.459E <sup>7</sup> |
|           | CIS-2 3  | 1.507E <sup>7</sup> | 1.525E <sup>7</sup> |
|           | 7-1 4    | 1.6E <sup>7</sup>   | 1.58E <sup>7</sup>  |
|           | 7-2 5    | 1.548E <sup>7</sup> | 1.569E <sup>7</sup> |
|           | 10-1 6   | 1.492E <sup>7</sup> | 1.496E <sup>7</sup> |
|           | 10-2 7   | 1.514E <sup>7</sup> | 1.516E <sup>7</sup> |
|           | 1-1 8    | 1.556E <sup>7</sup> | 1.572E <sup>7</sup> |
|           | 1-2 9    | 1.589E <sup>7</sup> | 1.585E <sup>7</sup> |
|           | Δ 10     | 1.351E <sup>7</sup> | 1.304E <sup>7</sup> |
| ALT (YPG) | WT 11    | 1.998E <sup>7</sup> | 1.986E <sup>7</sup> |
|           | CIS-1 12 | 1.425E <sup>7</sup> | 1.39E <sup>7</sup>  |
|           | CIS-2 13 | 1.367E <sup>7</sup> | 1.341E <sup>7</sup> |
|           | 7-1 14   | 1.392E <sup>7</sup> | 1.381E <sup>7</sup> |
|           | 7-2 15   | 1.386E <sup>7</sup> | 1.417E <sup>7</sup> |
|           | 10-1 16  | 1.478E <sup>7</sup> | 1.448E <sup>7</sup> |
|           | 10-2 17  | 1.46E <sup>7</sup>  | 1.413E <sup>7</sup> |
|           | 1-1 18   | 1.379E <sup>7</sup> | 1.33E <sup>7</sup>  |
|           | 1-2 19   | 1.366E <sup>7</sup> | 1.323E <sup>7</sup> |
|           | Δ 20     | 9.874E <sup>6</sup> | 9.554E <sup>6</sup> |
| YPG       | WT 21    | 1.471E <sup>7</sup> | 1.445E <sup>7</sup> |
|           | CIS-1 22 | 1.884E <sup>7</sup> | 1.902E <sup>7</sup> |
|           | CIS-2 23 | 1.452E <sup>7</sup> | 1.457E <sup>7</sup> |
|           | 7-1 24   | 1.877E <sup>7</sup> | 1.852E <sup>7</sup> |
|           | 7-2 25   | 1.645E <sup>7</sup> | 1.666E <sup>7</sup> |
|           | 10-1 26  | 1.318E <sup>7</sup> | 1.355E <sup>7</sup> |
|           | 10-2 27  | 1.756E <sup>7</sup> | 1.746E <sup>7</sup> |
|           | 1-1 28   | 1.472E <sup>7</sup> | 1.458E <sup>7</sup> |
|           | 1-2 29   | 1.504E <sup>7</sup> | 1.457E <sup>7</sup> |
|           | Δ 30     | 6.504E <sup>6</sup> | 6.168E <sup>7</sup> |

Post Bkg 214000 178000

COULTER COUNTS (8:30 PM)

|           | Bkg      | 40000               | 66000               |
|-----------|----------|---------------------|---------------------|
| ALT (YPD) | WT 11    | 1.998E <sup>7</sup> | 1.986E <sup>7</sup> |
|           | CIS-1 12 | 1.425E <sup>7</sup> | 1.39E <sup>7</sup>  |
|           | CIS-2 13 | 1.367E <sup>7</sup> | 1.341E <sup>7</sup> |
|           | 7-1 14   | 1.392E <sup>7</sup> | 1.381E <sup>7</sup> |
|           | 7-2 15   | 1.386E <sup>7</sup> | 1.417E <sup>7</sup> |
|           | 10-1 16  | 1.478E <sup>7</sup> | 1.448E <sup>7</sup> |
|           | 10-2 17  | 1.46E <sup>7</sup>  | 1.413E <sup>7</sup> |
|           | 1-1 18   | 1.379E <sup>7</sup> | 1.33E <sup>7</sup>  |
|           | 1-2 19   | 1.366E <sup>7</sup> | 1.323E <sup>7</sup> |
|           | Δ 20     | 9.874E <sup>6</sup> | 9.554E <sup>6</sup> |
| YPG       | WT 21    | 1.471E <sup>7</sup> | 1.445E <sup>7</sup> |
|           | CIS-1 22 | 1.884E <sup>7</sup> | 1.902E <sup>7</sup> |
|           | CIS-2 23 | 1.452E <sup>7</sup> | 1.457E <sup>7</sup> |
|           | 7-1 24   | 1.877E <sup>7</sup> | 1.852E <sup>7</sup> |
|           | 7-2 25   | 1.645E <sup>7</sup> | 1.666E <sup>7</sup> |
|           | 10-1 26  | 1.318E <sup>7</sup> | 1.355E <sup>7</sup> |
|           | 10-2 27  | 1.756E <sup>7</sup> | 1.746E <sup>7</sup> |
|           | 1-1 28   | 1.472E <sup>7</sup> | 1.458E <sup>7</sup> |
|           | 1-2 29   | 1.504E <sup>7</sup> | 1.457E <sup>7</sup> |
|           | Δ 30     | 6.504E <sup>6</sup> | 6.168E <sup>7</sup> |

5



2/26/09

COULTER COUNTS (9:45 am)

|              | Bkg         | 30000      | 48000      |
|--------------|-------------|------------|------------|
| YPD          | WT 1        | $1.744E^7$ | $1.767E^7$ |
|              | CIS-1 2     | $1.483E^7$ | $1.437E^7$ |
|              | CIS-2 3     | $1.48E^7$  | $1.487E^7$ |
|              | 7-1 4       | $1.564E^7$ | $1.57E^7$  |
|              | 7-2 5       | $9.148E^6$ | $8.962E^6$ |
|              | 10-1 6      | $1.42E^7$  | $1.469E^7$ |
|              | 10-2 7      | $1.444E^7$ | $1.507E^7$ |
|              | 1-1 8       | $1.478E^7$ | $1.464E^7$ |
|              | 1-2 9       | $1.4E^7$   | $1.406E^7$ |
|              | $\Delta$ 10 | $1.259E^7$ | $1.24E^7$  |
| ALT<br>(YPD) | WT 11       | $1.624E^7$ | $1.631E^7$ |
|              | CIS-1 12    | $9.116E^6$ | $9.338E^6$ |
|              | CIS-2 13    | $8.976E^6$ | $8.844E^6$ |
|              | 7-1 14      | $8.534E^6$ | $8.5E^6$   |
|              | 7-2 15      | $9.278E^6$ | $9.596E^6$ |
|              | 10-1 16     | $9.796E^6$ | $9.69E^6$  |
|              | 10-2 17     | $1.019E^7$ | $9.914E^6$ |
|              | 1-1 18      | $8.982E^6$ | $8.736E^6$ |
|              | 1-2 19      | $8.482E^6$ | $8.852E^6$ |
|              | $\Delta$ 20 | $5.494E^6$ | $5.636E^6$ |
| YPC          | WT 21       | $1.147E^7$ | $1.124E^7$ |
|              | CIS-1 22    | $1.559E^7$ | $1.57E^7$  |
|              | CIS-2 23    | $1.154E^7$ | $1.127E^7$ |
|              | 7-1 24      | $1.594E^7$ | $1.596E^7$ |
|              | 7-2 25      | $1.336E^7$ | $1.284E^7$ |
|              | 10-1 26     | $9.522E^6$ | $9.59E^6$  |
|              | 10-2 27     | $1.523E^7$ | $1.471E^7$ |
|              | 1-1 28      | $1.178E^7$ | $1.157E^7$ |
|              | 1-2 29      | $1.108E^7$ | $1.121E^7$ |
|              | $\Delta$ 30 | $3.732E^6$ | $3.662E^6$ |
|              | Post Bkg    | 118000     | 92000      |

6



3/2/09

RESULTS

CELLS PER 10 ML CULTURE

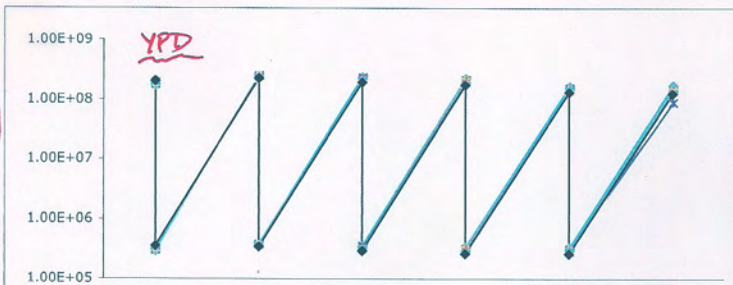

Cell Counts - YPD

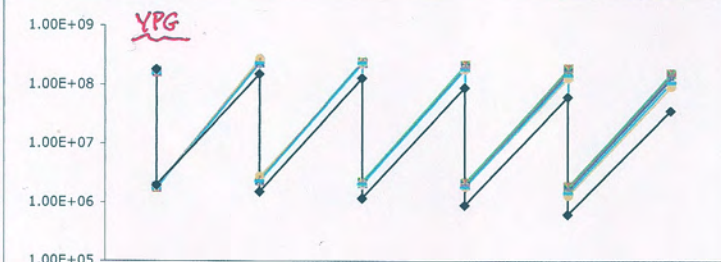

Cell Counts - YPG

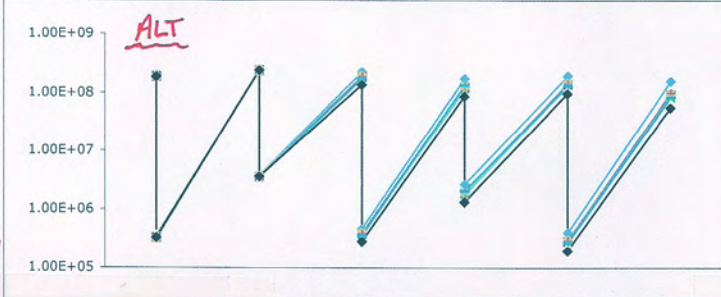

Cell Counts - ALT

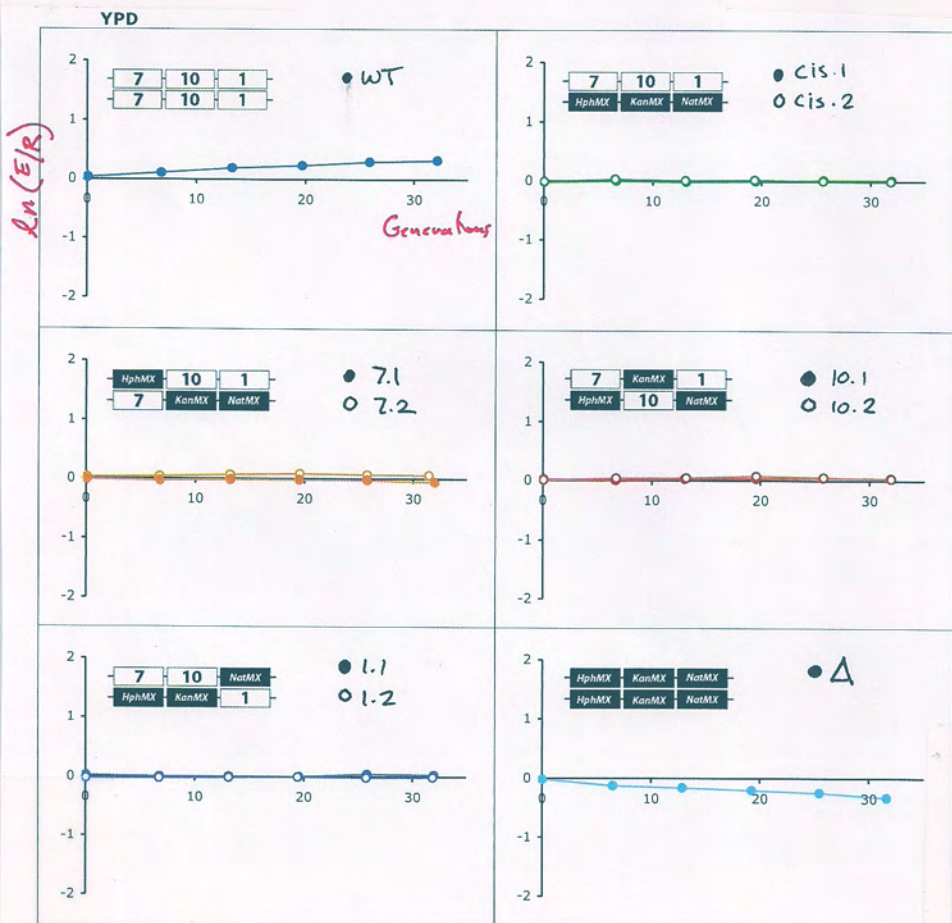

*[Faint handwritten notes and data tables on the right side of the page, including cell counts and media types.]*



3/2/09

ln(E/R)

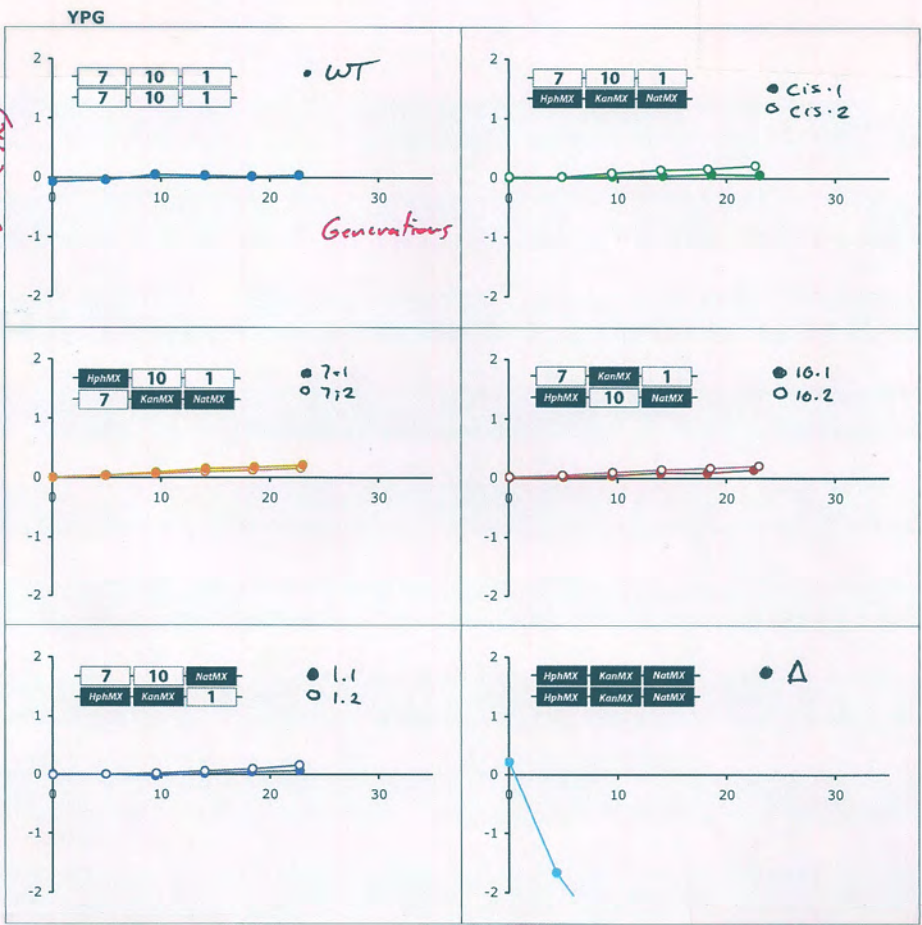

ln(E/R)

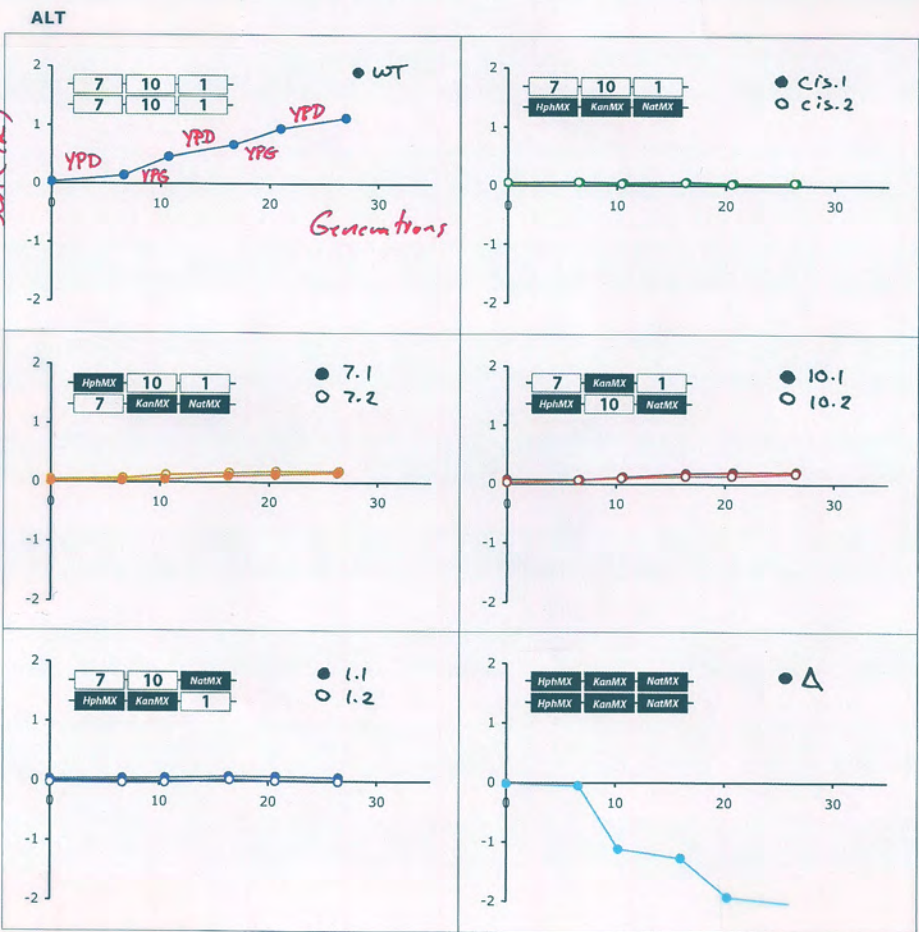



3/3/09

## NOTES AND ANALYSIS OF FITNESS ASSAYS

OVERALL: This is probably the best-looking data I have generated - I consider this experiment a big success; however, I got the null result: there is no difference between cis, 1-trans, 10-trans, and/or 7-trans in any of the tested environments. Interestingly, the WT is equivalent in fitness in YPD (if the drug cassettes are controlled for), YPG, but has a ~4.5% advantage in changing conditions.

COLTHER COUNTS: I did an excellent job w/ the dilutions, always diluting back when the cells were  $\sim 1-2 \times 10^7$  cells/ml - compare p. 84 w/ p. 59. I used the Coulter data to calculate generations for each dilution. I assume 10 ml cultures but to test this assumption I measured the vol (by weight) of 10 tubes of each YPD & YPG

|                      |                     |               |              |                                     |
|----------------------|---------------------|---------------|--------------|-------------------------------------|
| - YPD <sup>G</sup> - | 100.31 g / 10 tubes | $\Rightarrow$ | 10.0 ml/tube | } I am surprised this was right on. |
| - YPD <sup>D</sup> - | 100.09 g / 10 tubes | $\Rightarrow$ | 10.0 ml/tube |                                     |

YPD: In YPD I see no diff. for the 8 heterozygotes but an advantage for the WT and an equal-magnitude disadvantage for the het.  $\Delta$ . This is consistent w/ a ~1% disadvantage due to the drug markers.

YPG: As expected, the  $\Delta$  is terrible. No diff. in WT - this suggests (1) there is neg. feedback in GAL pathway and (2) the cost of the drug markers is mitigated because the GAL genes are highly expressed. There is a slight adv. (less than 0.5%) in the 8 heterozygotes - perhaps this reflects fitness cost in reporter (?)

ALT: As expected, the  $\Delta$  does poorly when shifted to ~~Y~~ YPG but is otherwise fine in YPD. There may be a slight advantage in 7-trans & 10-trans that is not seen in cis or 1-trans - I am not sure if that is significant or what to make of it. The WT has a v. strong advantage in the alternating conditions.



3/3/09

NOTES & ANALYSIS CONT.

FACS: To save time on FACS day I transferred the samples from microvolume tube to pre-chilled FACS tube the night before (2/26) and ran FACS last Friday (2/27). Unlike last time, there were no major issues w/ the LSRII (see pg. 57 & 62). The two-color expts were easily interpretable using one set of gates for YPD and another for YPG.

NEGATIVE FEEDBACK: That there is no difference in fitness between WT and the heterozygous reference suggests that there is sufficient negative feedback ~~in~~ to ensure that the proper amount of GAL1, 10, and 7. What is the nature of this feedback? Transcriptional? Translational? Post-translational? It may be useful to do averages on these strains growing in Gal.

DYNAMICS OF SWITCHING: The simplest explanation for the advantage of WT in alternating YPD-YPG is that the second copy of GAL1-10-7 allows the cells to reach steady state faster. What about 3 copies? 4 copies? Also, is this advantage only in the Glucose  $\rightarrow$  Galactose shift? Hard to tell from the plots because the actual shift probably occurs several generations (?) after transfer.



3/4/09

NEW STRAIN CONSTRUCTION: MOVING GAL1-10-7

- The previous experiment failed to show a difference between cis- and trans- configurations of the GAL genes. However this was not really a direct test of moving the GAL genes — in all cases the genes were still allelic (or nearly so).
- Instead, I want to actually move the GAL1-10-7 region to a different place in the genome and repeat the knockouts there. I have come up w/ a strategy that should work:
- Amy has a copy of the Yeast Genome Tiling plasmid collection. I obtained plasmid YPGM1114 which contains the GAL1-10-7 genomic region

YPGM1114 INSERT:

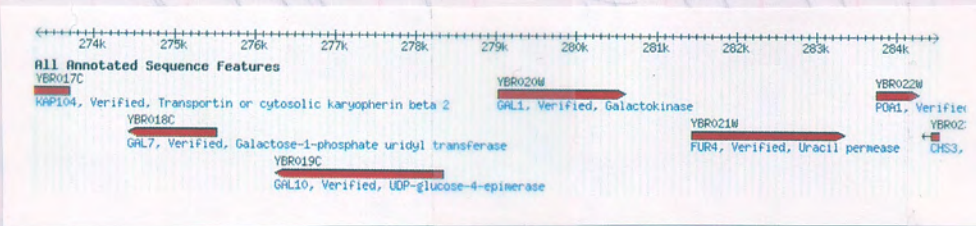

digested using NEB cutter to find RE sites

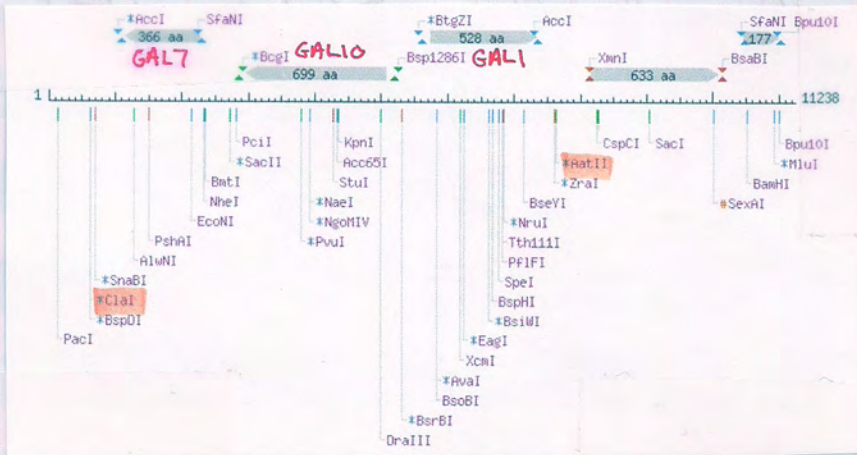

↪ AatII ~ 300 bp downstream of GAL1  
 ClaI ~ 500 bp downstream of GAL7



3/9/09

Strategy for integrating GAL1,10,7 @ YELO14C

YELO14C is a dubious ORF that does not overlap w/ any other CDS.  $\therefore$  it is a suitable site to integrate GAL1,10,7.

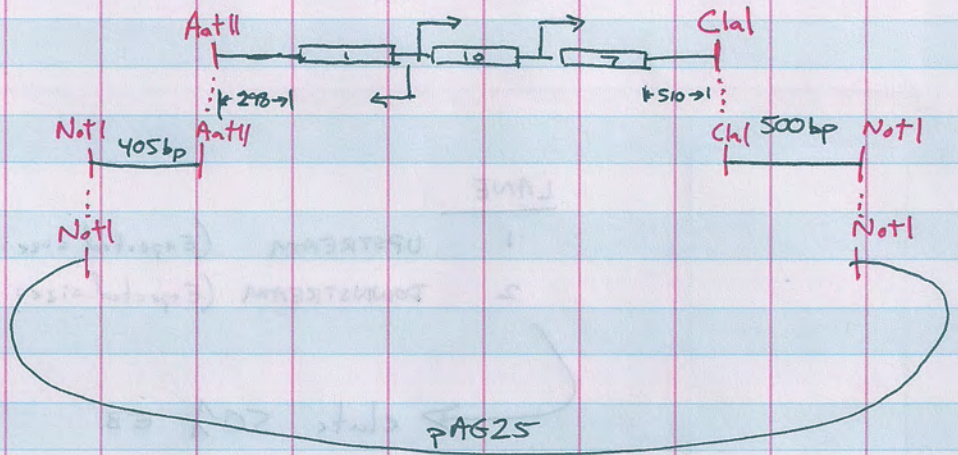

- ① Cut YPGM11114 w/ AatII  $\&$  ClaI
- ② Ligate 405bp upstream of YELO14C  $\&$  500bp downstream of YELO14C using AatII  $\&$  ClaI sites, respectively
- ③ Cut w/ NotI and integrate into NotI sites of pAG25

Over the weekend, I misinterpreted 4 clones each containing YPGM11114 or pAG25:

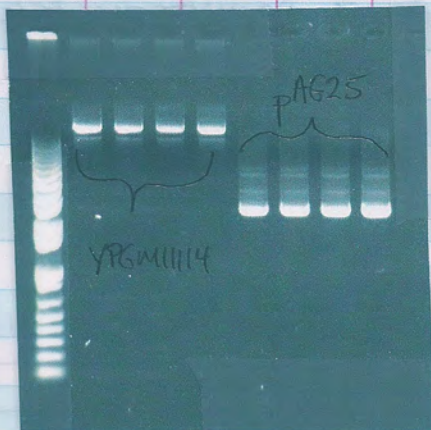

→ elute in 50% EB



3/9/09

PO/ME

PCR YEL014C UPSTREAM & DOWNSTREAM sequence using primers:

|         |                     |                                    |
|---------|---------------------|------------------------------------|
| OGIL125 | YEL014C_extF4_NotI  | GTGGATGCGGCCGCTGTAATAATATTAAGATGGG |
| OGIL130 | YEL014C_extR4_AatII | TAGTGCACGTCTGTGATCAAATTTTTGTGTG    |
| OGIL131 | YEL014C_extF6_ClaI  | TATCCAATCGATGCTAAAGTAATTCTTGGTTT   |
| OGIL132 | YEL014C_extR6_NotI  | ATAGTGCAGGGCCGCCATGCAGGGATATGACTG  |

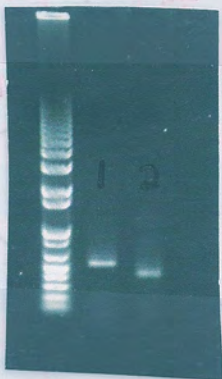

LANE

- 1 UPSTREAM (Expected size: 500 bp)
- 2 DOWNSTREAM (Expected size: 405 bp)

→ clone 50% EB

Clal & AatII DIGESTIONS

Digest the 4 YPGM1114 minipreps & the UPSTREAM & DOWNSTREAM PCRs

- add 5  $\mu$ l NEBuffer 4 to each tube
- add 0.5  $\mu$ l BSA to each
- add 0.5  $\mu$ l AatII to the minipreps & UPSTREAM PCR
- add 0.5  $\mu$ l Clal to the minipreps & DOWNSTREAM PCR
- 37° block ~ 5pm.

3/10/09

Run out digests (~10am)

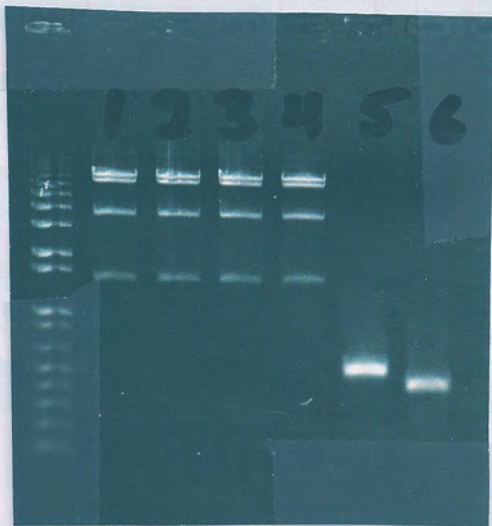

LANE

- 1 YPGM1114 A cut w/ AatII & Clal
- 2 ~~\_\_\_\_\_~~ B ~~\_\_\_\_\_~~
- 3 ~~\_\_\_\_\_~~ C ~~\_\_\_\_\_~~
- 4 ~~\_\_\_\_\_~~ D ~~\_\_\_\_\_~~
- 5 YEL014C UPSTREAM cut w/ AatII
- 6 YEL014C DOWNSTREAM cut w/ Clal



3/10/09

Expected sizes for AatII & Clal digest

The YPGM11114 insert could be in two orientations since it was cloned into one RE site.

ORIENTATION 1

| <u>w/o Methylation</u> | <u>w/ Dam Methylation</u> |
|------------------------|---------------------------|
| 3229 bp                | } 6254*                   |
| 3025                   |                           |
| 1506                   | 1506                      |
| 6989                   | 6989 ← GAL1,7,10          |
| 3653                   | 3653                      |

ORIENTATION 2

| <u>w/o Methylation</u> | <u>w/ Dam Methylation</u> |
|------------------------|---------------------------|
| 3229 bp                | } 6254*                   |
| 3025                   |                           |
| 4485                   | 4485                      |
| 6989                   | 6989                      |
| 674                    | 674                       |

\* one Clal site is subjected to Dam methylation

- The digest on p. 90 is consistent w/ Orientation 1 + methylation
  - The E. coli DH10B must be Dam-positive.
  - PCR purify the UPSTREAM & DOWNSTREAM digests
  - Gel purify the 6989 bp band
- ↳ I pooled the 4 YPGM11114 digests and ran them in 3 large lanes

→ NEXT PAGE

Overnight I attempted to PCR the GAL1,10,7 region from a WT FY4 strain (6m1A gDNA from freezer) and from the triple Δ (yGIL366 from benchtop). I used PrimeStar polymerase (previous run w/ Tag failed) and the following primers:

400downGALrevR: 5'AAAG66TTCTGCTAGAGTCC3' (from Sandy)

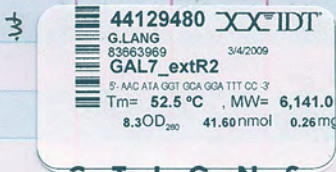

| <u>LANE</u> | <u>TEMPLATE</u>  |
|-------------|------------------|
| 1           | FY4 WT GAL1-10-7 |
| 2           | yGIL366          |

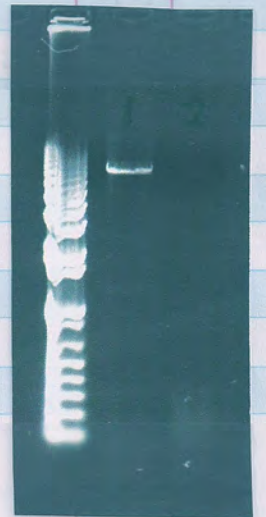



3/10/09

- Elute UPSTREAM & DOWNSTREAM into 30  $\lambda$  EB
- Gel purify and pool plasmid digest band 7kb.
- ↳ Elute in combined 30  $\lambda$

Check concentration by nanodrop:

UPSTREAM PCR 46.5 ng/ $\mu$ l  
 DOWNSTREAM PCR 30.4  
 GALI-10.7 12.0

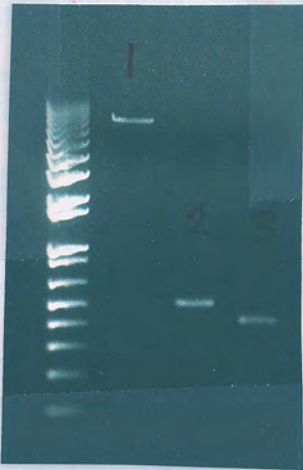

LANE

- 1 GALI-10.7, gel purified
- 2 UPSTREAM
- 3 DOWNSTREAM

Set up Ligation:

21.5  $\lambda$  GALI-10.7  
 2.0  $\lambda$  UPSTREAM  
 2.0  $\lambda$  DOWNSTREAM  
 3.0  $\lambda$  10x Ligase Buffer  
 1.5  $\lambda$  T4 DNA ligase  
 30.0  $\lambda$

RT Ligation @ 5:30pm

3/11/09

Run out ligation (1pm):

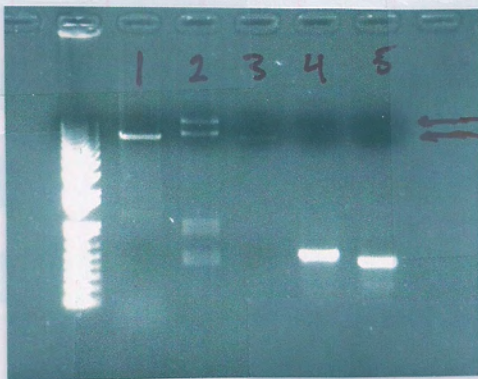

LANE

- 1 GALI-10.7 PCR (p. 91)
- 2 Ligation
- 3 GALI-10.7, gel purified
- 4 UPSTREAM
- 5 DOWNSTREAM

GAL-1.10.7 w/ ligated UPSTREAM/DOWNSTREAM ends

GAL-1.10.7



3/11/09

- Heat kill o/n ligation 10 min @ 65°
- PCR purify ligation → elute in 30  $\mu$ l
- Cut insert  $\pm$  pAG25 w/ NotI
  - 30  $\mu$ l pAG25 (A on p. 89, lane 1) or GAL1-10.7 ligation
  - 3  $\mu$ l NEBuffer 3
  - 0.3  $\mu$ l 100 $\times$  BSA
  - 0.3  $\mu$ l NotI
  - 33.6  $\mu$ l → 37° block @ 2:30
- At 5:45 - add 0.3  $\mu$ l CIP to pAG25
- CIP for 1 hour
- Inactivate NotI ~ 20 min @ 65°C
- Put in freezer

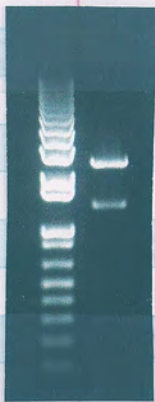

← 2390 bp  
← 1314 bp

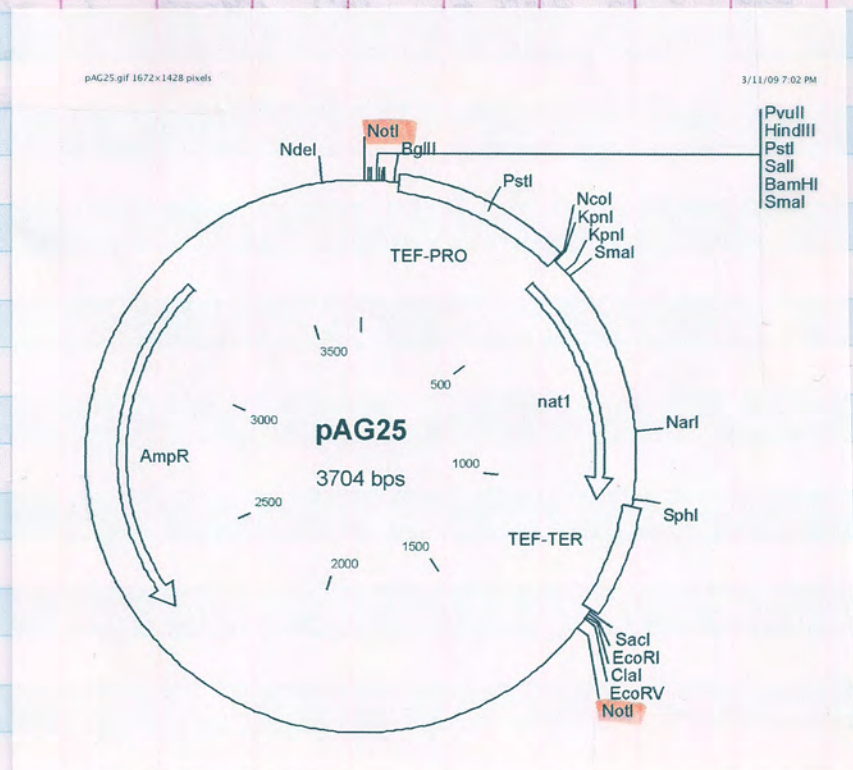



3/12/09

- Gel purify ligated GALI-10.7  $\pm$  YEC14C-sequence and pAG25 both cut w/ NotI  $\rightarrow$  elute in 30  $\mu$ l EB
- I also gel purified the band of GALI-10.7 w/o the YEC14C ends

Nanodrop to quantify:

vector - 44.4 ng/ $\mu$ l  
insert (GALI-10.7 w/ends) - 1.8  
GALI-10.7 w/o ends - 5.4

• Set up ligation:

|      |         |                           |               |         |
|------|---------|---------------------------|---------------|---------|
| 16.5 | $\mu$ l | Insert (GALI-10.7 w/ends) | $\rightarrow$ | 29.7 ng |
| 0.5  | $\mu$ l | Vector                    | $\rightarrow$ | 22.2 ng |
| 2.0  | $\mu$ l | 10x ligase buffer         |               |         |
| 1.0  | $\mu$ l | T4 DNA ligase             |               |         |
| 20.0 | $\mu$ l |                           |               |         |

$\hookrightarrow$  ligate RT 20 min.  $\rightarrow$  transform 5  $\mu$ l into duplicate DH5 $\alpha$

3/13/09

- Transformation efficiency was poor - only 3 colonies on Plate 1 and 5 on plate 2. This morning I picked all 8 and inoculated 2.5 mL LB+Amp (10am) - I am concerned they may all be empty vector.

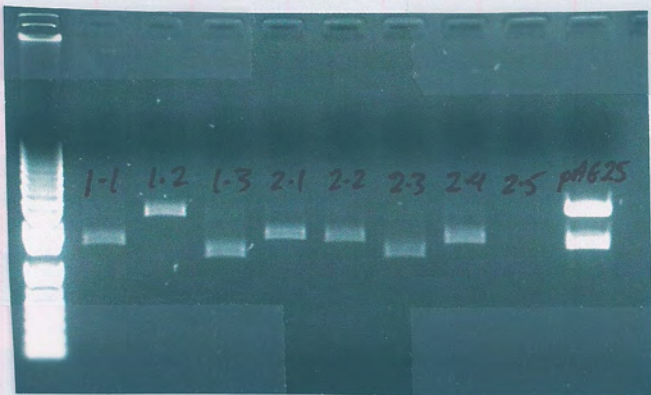

$\rightarrow$  NotI digested minipreps



3/24/09

SECOND ATTEMPT AT MOVING GAL1-10-7

Last week I made midi-preps of 2 clones each of YPGM11114 and pAG25 according to QIAGEN's instructions.

↳ Nanodrop to quantify

|                        |   |       |       |
|------------------------|---|-------|-------|
| YPGM11114              | A | 261.2 | Ag/μl |
| "                      | B | 257.6 |       |
| pAG25                  | A | 515.9 |       |
| "                      | B | 525.3 |       |
| pAG25 midi-prep (p.89) |   | 88.1  |       |

• Digest YPGM11114

|      |   |                        |
|------|---|------------------------|
| 43.5 | λ | midi-prep of YPGM11114 |
| 5.0  |   | NEBuffer 4             |
| 0.5  |   | BSA                    |
| 0.5  |   | AatII                  |
| 0.5  |   | ClaI                   |
| 50   | λ |                        |

Digest ~3h; heat inactivate enzymes @ 65° for 20min

• PCR upstream & Downstream linkers

↳ same as p.90 but 5, 100λ PCR

• PCR cleanup pooled PCRs → elute 30λ EB

• Digest - add 3λ NEBuffer 4, 0.3λ BSA, & 0.3λ enzyme

↳ AatII - upstream  
ClaI - downstream

• Digest ~3 h, heat inactivate @ 65° 20min.

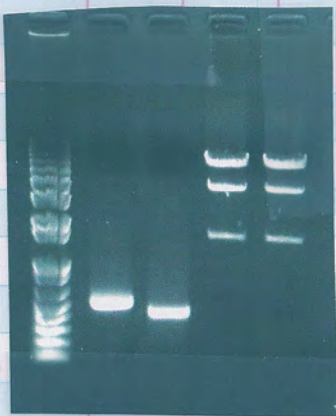

Lane

|   |                 |
|---|-----------------|
| 1 | Upstream cut    |
| 2 | Downstream cut  |
| 3 | YPGM11114 A cut |
| 4 | " B cut         |

the two ↑ MW bands can be destroyed if the gel is run out longer.

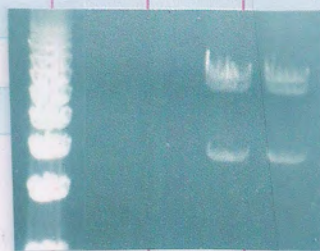



3/24/09

3/24/09

• Ligate linkers and cut plasmid

- 50  $\mu$ l YPGM11114 A cut w/ *NotI* & *ClaI*
  - 30  $\mu$ l Upstream linker cut w/ *NotI*
  - 30  $\mu$ l Downstream linker cut w/ *ClaI*
  - 13  $\mu$ l 10x Ligase Buffer
  - 6.5  $\mu$ l T4 DNA ligase
- 
- $\approx 130 \mu$ l

↳ Ligate  $\approx 1$  h @ RT

• P/C, ethanol precipitate ligated plasmid

- bring vol up to 200  $\mu$ l w/ TE
- add 200  $\mu$ l P/C, vortex, spin 5 min
- transfer to new tube
- add 25  $\mu$ l 3M NaOAc
- add 225  $\mu$ l Isopropanol
- ppt @ RT for 35h
- spin 10 min; aspirate
- wash w/ 500  $\mu$ l 70% EtOH; spin 2 min; ~~aspirate~~; speed Vac
- resuspend 50  $\mu$ l TE
- Nanodrop: 406.8 ng/ $\mu$ l

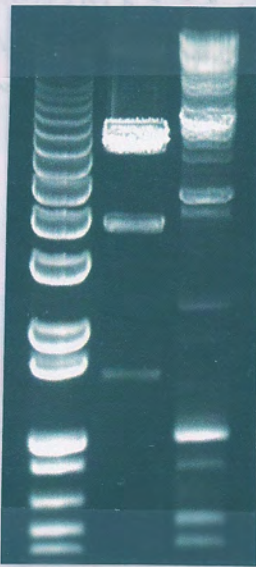



3/24/09

Transform yGIL413 & yGIL414 w/ ligaton

- Yesterday I started o/n cultures of yGIL413 & yGIL414
- This morning I diluted the cultures 1:100 into 10 ml YPD
- Counter Count (2:30 pm)

|          |         |         |
|----------|---------|---------|
| Bkg      | 246000  | 146000  |
| yGIL413  | 2.587E7 | 2.618E7 |
| yGIL414  | 2.537E7 | 2.544E7 |
| Post Bkg | 914000  | 670000  |

- Start transformations ~ 2:45 pm

3/25/09

~~Replica plate~~ Yesterday I transformed both yGIL413 & yGIL414 with 10  $\mu$ l of the ligaton on p. 96. As usual this was done in duplicate  $\rightarrow$  one was plated onto YPD and the other onto YPD + ClonNat, G418, & Hyg. Today I see growth on both plates, with less growth near the center of the drug plate.

- Replica plate the 4 plates to minimal Galactose.

3/27/09

There are a large # of colonies on all 4 plates ~ probably between 500-1000 colonies. It is hard to tell if there are more colonies on the plates that were replica plated from YPD compared to the ones from YPD+drug.

I picked 16 colonies off of the yGIL413 & yGIL414 plates (from drug) ~~onto~~  $\rightarrow$  and restreaked onto YPD.

I overlaid drug onto YPD plates

|         |                            |                          |
|---------|----------------------------|--------------------------|
| G418    | 60 $\mu$ l + 40 $\mu$ l    |                          |
| ClonNat | 30 $\mu$ l + 70 $\mu$ l    |                          |
| Hyg.    | 7.8 $\mu$ l + 90.2 $\mu$ l | (new stock ~ 1140 mg/ml) |
|         | $\uparrow$                 | $\uparrow$               |
|         | Drug                       | H <sub>2</sub> O         |



3/30/09

VERIFYING TRANSFORMANTS

- On Sunday (3/29), I picked a single colony off of each of the 32 restreaked plates and inoculated 3 ml YPD.
- Yesterday I transferred 200  $\mu$ l of each ~~and restreaked~~ into a 96 well plate and pin transferred to YPD, YPGal, minimal Gal, G418, Hyg,  $\dagger$  CloNat

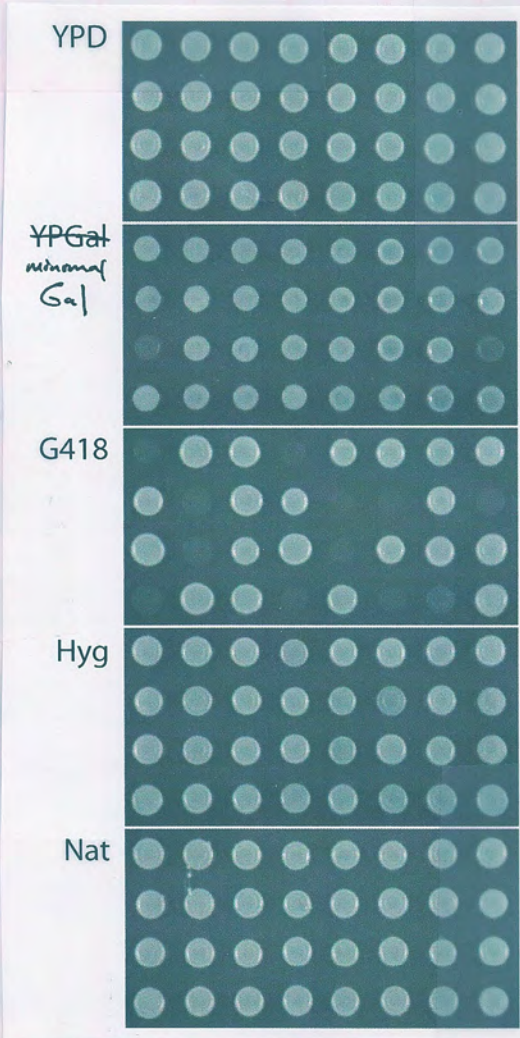

} putative yGIL413 transformants A  $\rightarrow$  H  
I  $\rightarrow$  P

} putative yGIL413 transformants A  $\rightarrow$  H  
I  $\rightarrow$  P

Notes

- As expected everything grows on YPD and YPD + CloNat (Nat also marks the fluorophore)
- Two strains do not grow on GAL (<sup>414</sup> A & 414 H)
- 12 of the 32 putative transformants do not grow on YPD + G418 suggesting that GAL1.10.7 has integrated at its endogenous locus, thus replacing the drug cassettes.
- I expected the YPD + Hyg plate to look like the YPD + G418 plate, but everything grows  $\rightarrow$  two possibilities

- (1) not enough drug - this is the 1st time I used this Hyg. I should streak a sensitive strain onto this plate.
- (2) These strains contain a duplication in the GAL1.10.7 region which duplicates the Hyg<sup>R</sup> cassette. This could also explain my inability to generate a PCR product over this region (p. 91). I hope this is not the case.

4/2/09

I streaked two Hyg<sup>S</sup> strains, yGIL213 & yGIL220 onto the Hyg plate  $\rightarrow$  both grew  
 $\therefore$  Not enough drug.



3/31/09

I wanted to PCR verify that the GAL1-10.7 region integrated into YELO14C using the following primers

44504448 XX-IDT  
 G.LANG  
 84023920 3/25/2009  
 YELO14C\_extF7 135  
 5'-TAT TAA CGG CCA AAT TAC CC-3'  
 Tm= 50.3 °C, MW= 6,045.0  
 8.6OD<sub>260</sub> 42.70nmol 0.26mg

44504449 XX-IDT  
 G.LANG  
 84023921 3/25/2009  
 YELO14C\_extR7 136  
 5'-CAA AAT GAA CTA CAG GAT TCC-3'  
 Tm= 49.1 °C, MW= 6,407.2  
 8.6OD<sub>260</sub> 40.40nmol 0.26mg

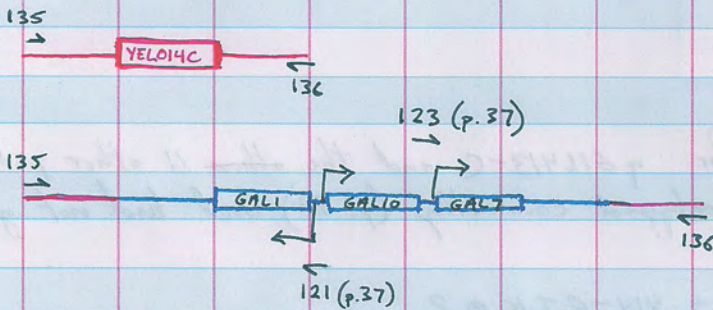

- I made gDNA preps of 12 putative transformants 413A-F & 414A-F
  - PCR using:
    - YELO14C\_extF7 / GAL1\_extF3
    - YELO14C\_extR7 / GAL7\_extF3
    - YELO14C\_extF7 / YELO14C\_extR7
- } 3m. extension

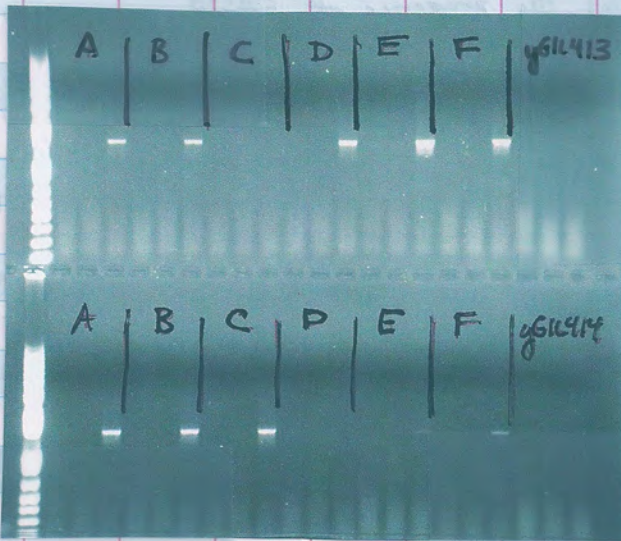

→ In each putative transformant, the three rows correspond to the three PCRs

NOTES

- Of these 12 strains, 7 phenotyped correctly (p 98).
- Only for 413C & 414D did I not get a PCR product for intact YELO14C
- I did not get any PCRs off of the parental gDNA preps
- I did not get PCR products w/ the check primers

- Rerun PCR using 413C & 414D as template and using primers GAL1\_extF2 and GAL7\_extF2 in place of GAL1\_extF3 & GAL7\_extF3 (p.25) #113 (p.25) #117



4/2/09

- For the two gDNA preps (413-C & 414-D) where I did not get any PCR products, I reran the PCRs:

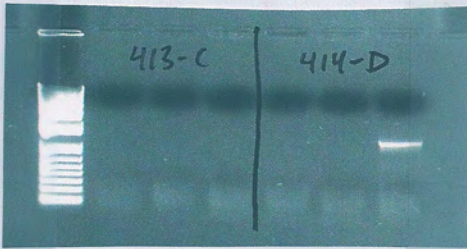

still nothing for 413-C, but 414-D is negative (lanes same as p. 99)

- I made gDNA preps for yGIL413-C and the other 11 other putative transformants that phenotyped correctly (p. 98) and had not yet been genotyped:

413 - G, H, I, K, L, O & 414 - G, J, K, M, P

- PCR using primer pairs:

LANE 1 135 & 113

" 2 117 & 136

" 3 135 & 136

" 4 115 & 116 (p 25)

} same as before

- verifies the presence of GAL10

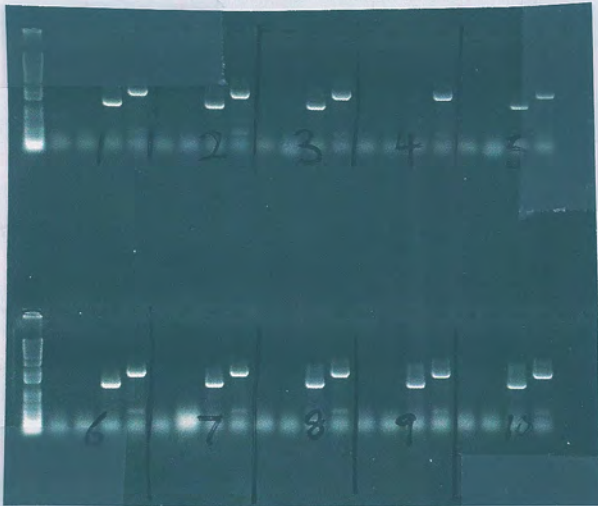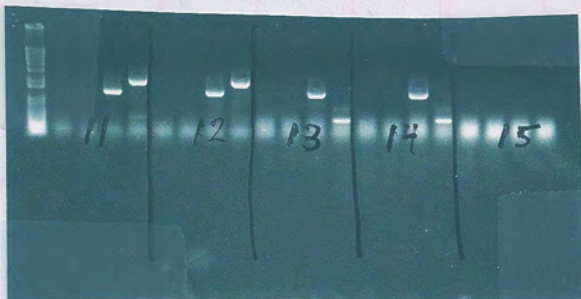

TEMPLATE

1 413-C

2 G

3 H

4 I

5 K

6 L

7 O

8 414-G

9 J

10 K

11 M

12 P

13 yGIL366

14 " 413

15 " 414

NOTES

• Perhaps still too much template DNA in yGIL414.

• As expected, no GAL10 in yGIL366 or yGIL413

• GAL10 present in empty else

• WT YEL014C in all strains (but ambiguous in 413-I)

→ will redo PCR on 413-I



4/2/09

### CROSSING PHENOTYPICALLY CORRECT PUTATIVE TRANSFORMANTS

- 18 putative transformants are phenotypically correct:  
413-B, C, E, F, G, H, I, K, L, O & 414-C, D, F, G, J, K, M, P  
↳ none genotyped correctly (413-I is still ambiguous)

Possibilities:

- I may have put YPGM11114 (or something like it) back together and the GAL-1.10.7 region is maintained as a 2 micron.  
↳ there are a number of high MW bands on p. 963
- Other homology could have targeted GAL-1.10.7 to either LEU2 or regions adjacent to the endogenous GAL-1.10.7
- successful transformants could have resulted from duplication of the drug-marked region in these strains.
- To sort out the above possibilities, I crossed the above putative transformants to y61L405 or y61L407 depending on mating type. These strains have a WT GAL10 and are G418<sup>S</sup>, but lack GAL1 and GAL7 therefore cannot use galactose.  
↳ a useable strain will segregate G418<sup>R</sup> and Gal<sup>+</sup> 2:2 and independently

4/5/09

- On Wednesday evening (4/3) I picked a single diploid and inoculated 3 ml YPD.
- Today I took ~1.5 ml of the saturated culture, spun, washed w/ H<sub>2</sub>O and resuspended in 4 ml 2% KAc.
- Since I am concerned that most of my putative transformants contain a plasmid I have been attempting to cure the plasmid by replica plating the triph-dip plates or the Gal plates (replica plated from the 3 day) on YPD. I replica plated each twice to YPD (on 4/3 and 4/4). Today I replica plated to minimal Gal.
